# Supplementary material
Source: Research Square preprint supplement (doi:10.21203/rs.3.rs-5336506/v1)
Supplement: Supplementary file 1 [file 428f2a64d2395ecef6dc4079.docx]

**Contents**

**ⅠDetailed materials and methods**

**ⅡSupplemental figures**

**Figure S1** Quality control for scRNASeq and volcano plots of DEGs.

**Figure S2** Identification of DEGs.

**Figure S3** Seventy-nine candidate genes.

**Figure S4** Meshwork and expression levels of hub genes.

**Figure S5** Cell distribution of four hub genes between DFUs and controls.

III **Supplemental tables**

**Table S1** Primer sequences

**Table S2-S3** Detailed content of GO (S2) and KEGG enrichment analysis (S3)

**Table S4** Influence of SNP mutations on miRNA hub genes

**Table S5** Details of molecular docking

**ⅠMaterials and methods**

**Data extraction**

The following DFU-associated datasets were obtained from Gene Expression Omnibus (GEO) (https://www.ncbi.nlm.nih.gov/): GSE165816, GSE80178, and GSE134431. GSE165816 was a single-cell sequencing dataset of 11 foot skin tissue samples from patients with DFUs and 10 foot skin tissue samples from controls. GSE80178, a training set, included nine DFU tissue samples and three controls. GSE134431 was a validation set incorporating 13 DFU tissue samples and eight controls. Other cuproptosis-associated genes (CRGs), including ATP7A, ATP7B, CDKN2A, DBT, DLAT, DLD, DLST, DLTA, FDX1, GCSH, GLRX5, GLS, GSS, ISCA2, LIAS, LIPT1, MTF1, NDUFA1, NDUFB2, NDUFC1, NFE2L2, PDHA1, PDHB, SLC31A1, and TIMMDC1, were identified from previous literature.

**Identification of candidate genes**

The Seurat package (version 4.1.0) was chosen to filter low-quality cells (parameters: minimum cells = 3, minimum features = 200) and integrate and normalize data. With respect to quality control, the following conditions were required to be satisfied: mitochondrial DNA proportion (mtDNA%): < 5%; number of genes tested per cell: 100–6000. The top 2000 highly variable genes (HVGs) were then selected with the FindVariableFeatures function. After principal component analysis and uniform manifold approximation and projection (UMAP), clustering analysis was performed. Cell subpopulations were subsequently annotated with the SingleR package (version 1.831) to identify dissimilar cell types. Marker genes were obtained with the FindAllMarkers function for each cell type, and various analyses were performed to identify differentially expressed genes (DEGs) with the Wilcoxon rank sum test, which were denoted DEGs1. Thereafter, with the GSVA package (version 1.42.0), single sample gene set enrichment analysis (ssGSEA) was performed to analyze various cell types and calculate CRGs scores. According to the median CRGs score, the cells were divided into high and low CRG groups. Differences were identified with the Wilcoxon rank sum test (|avg-log2FC| > 0.25 and adj. *P* < 0.05). All DEGs from diverse cell types were aggregated as a union set, and duplicates were removed; these DEGs were denoted DEGs2.

GSE80178 was analyzed, and DEGs between the DFUs and controls were identified with the limma package (version 3.50.1) with a threshold of *P* < 0.05 and |log2FC| > 1; these DEGs were denoted DEGs3. Subsequently, an intersection of DEGs1, DEGs2, and DEGs3 was generated; these genes were considered candidate genes. The clusterProfiler package (version 4.6.0) was then used to perform enrichment analysis for candidate genes, including Gene Ontology (GO) and Kyoto Encyclopedia of Genes and Genomes (KEGG).

**Screening of hub genes**

The STRING database (http://string.embl.de/) was used to create a protein-protein interaction (PPI) network, after which the top ten genes were detected independently by seven algorithms: Closeness, MCC, Degree, MNC, Radiality, Stress, and EPC on the cytohubba platform. Crucial genes were determined from the intersection of genes via the seven algorithms. Additionally, sequence information was obtained from NCBI (https://www.ncbi.nlm.nih.gov/), and subcellular information was obtained from mRNALocater (http://bio-bigdata.cn/mRNALocater/).

**Enrichment analysis**

GeneMANIA (http://genemania.org/search/) was used to present the genetic interaction between hub genes and co-expression genes. Samples in GSE80178 were assigned to high- and low-expression groups to determine which biological processes were associated with hub genes, according to the median expression of each hub gene. Furthermore, all samples were prepared for GSEA. Next, full genes were ranked according to log2FC, and c2.cp.kegg.v7.5.1.symbols.gmt served a reference gene set. Similarly, ingenuity pathway analysis was performed to determine which signaling pathways were associated with hub genes. The standard settings were as follows: a Z-score >0 indicated that the pathway was activated, and vice versa. Ultimately, the enrichplot package (version 1.18.0) was used for gene set variation analysis.

**Creation of a regulatory network**

To further probe the underlying mechanisms through which crux genes participate in DFUs, TF-gene, competing endogenous RNA (ceRNA), and miRNA-single nucleotide polymorphisms (SNP)-mRNA networks were built. The KnockTF (http://www.licpathway.net/KnockTF/index.html) was used to predict TFs. Additionally, miRNAs regulating the hub genes were predicted by miRTarBase (https://mirtarbase.cuhk.edu.cn/) and TargetScan (<http://www.targetscan.org>). After the results were intersected, mutual miRNAs were identified to create the ceRNA network. The MiRNet 2.0 network (https://www.mirnet.ca) was used to elucidate interactions between miRNAs and lncRNAs. Notably, to construct the ceRNA network, core lncRNAs were identified as those regulating more than five miRNAs simultaneously. Eventually, miRNASNP (https://bio.tools/mirnasnp-v3#!) was used to predict SNPs in the seed regions of joint miRNAs, and the binding effects of SNP mutations in seed regions for target genes was evaluated with the Cytoscape platform.

**Drug and disease prediction**

The Drug-gene Interaction (DGIdb, https://www.dgidb.org) and Comparative Toxicogenomics (CTD, <http://ctd.mdibl.org>) databases were used to predict drugs and diseases correlated with hub genes. Only endocrine system diseases with a relevant score > 5 were selected via Cytoscape.

**Single cell trajectory analysis**

Initially, cell types were annotated with UMAP for dimensionality reduction. The monocle2 package (version 2.26.0) was used to analyze the pseudotime trajectory and cell distributions for four hub genes. The Differentialgenetest function was used to explore gene dynamics in cell differentiation.

**Immune infiltration and cell-cell communication**

Immune infiltration was assessed with the psych (version 2.1.6) and ggcorrplot packages (version 0.1.4). The ggplot2 package (version 3.3.5) was used to visualize plots. Spearman's correlation coefficient was used at *P* < 0.05 to detect significant differences between controls and DFUs. A nomogram was established with the rms package (version 6.5.0). The CellChat package (version 1.6.1) was used to analyze concealed signaling interactions.

**Drug sensitivity analysis and molecular docking**

The molecular structures were obtained from the PubChem (https://pubchem.ncbi.nlm.nih.gov). CB-Dock (http://cao.labshare.cn/cb-dock/) was used to perform protein–ligand docking. PyMOL (version 3.0.3; Schrodinger, New York, NY, USA) and LigPlus (version 2.2.8; EMBL-EBI, Cambridge, UK) software were used for exteriorization. The potential drug responses were predicted with the pRRophetic package (version 0.5).

**Verification of hub gene expression**

A difference analysis of hub gene expression was performed between controls and DFUs in the validation set to confirm our findings.

**Code availability**

Entire R codes were available from the corresponding author on reasonable request.

**Creation of the DM model**

The sample size was determined according to preliminary experiments. In addition, the 3R principle for laboratory animals (reduction, replacement, and refinement) was followed. Eighteen male Wistar rats (approximately 4 weeks old and weighing 230–250 g) were purchased from Jinan Pengyue Experimental Animal Breeding Ltd. (license ID, SCXK2022-0006; Jinan, China) and raised in a specific-pathogen-free animal facility (temperature, 25–27°C; humidity, 40%–70%) with three rats per cage under 12 h light-dark cycles. The rats were fed a standard rat chow diet and water *ad libitum*, and acclimated 1 week before the experiments. The rats were randomly split into two groups in a blinded manner according to a random number table, as follows: control group (n = 6, reared with standard food); and DM group (n = 12, nursed with a high-fat diet). Before model establishment, Wistar rats were given free access to water and fasted for 12 h. On the day of diabetic rat model establishment, baseline weight was assessed, and blood glucose (BG) was detected with a glucometer (VQPET; Hangzhou, China) from the posterior tail vein. Streptozotocin (STZ) (GlpBio, Montclair, CA, USA) was dissolved in sodium citrate buffer (Solarbio, Beijing, China) at pH 4.2–4.5, to a concentration of 0.1–0.2 mol/L. A 1% STZ solution was injected intraperitoneally into experimental rats to induce DM at a dosage of 45 mg/kg, whereas the same volume of citrate buffer was injected intraperitoneally into controls. Blood samples were obtained from the tail vein. Rats with a persistent fasting blood glucose level >16.7 mmol/L for 3 days, and representative symptoms of polydipsia, polyuria, hyperphagia, and weight loss, were considered to be type 2 diabetes (T2DM) models and subjected to the following experiments. Rat BG levels and weights were monitored weekly. Insulin was injected subcutaneously to maintain a BG range of 20–25 mmol/L.

**Construction of the DFU model**

Rats with T2DM were anesthetized with 10% chloral hydrate (0.3 mL/100 g intraperitoneal; Sigma, St. Louis, MO, USA) 1 week after the diabetic model was established. The DFU model was formed by removal of a layer of skin from the foot instep (a rectangular-shaped area of 3 ×7 mm) with a plastic template (DFU group, n = 12). Normally fed rats underwent sham operation (non-diabetic foot ulcers; NFU group, n = 6). All study personnel were blinded to group allocations for animal operations. One week after establishing the DFU model, the following indicators were documented with digital camera photography (Canon, Tokyo, Japan) to monitor DFU status: metal status; food intake; BG level; fasting weight; mortality; and wound healing status. The rats were sacrificed through irreversible euthanasia with 100% CO2 for at least 12.5 min at 30%–70% volume displacement/min; the chest was subsequently opened bilaterally, as an assistive physical execution to ensure that the animals were deceased before carcass disposal. A 3 cm × 3 cm full layer section of skin tissue containing healthy skin surrounding the wound was excised from the DFU group, whereas a duplicate full-thickness skin tissue specimen was excised from the same site in the NFU group. After the cut tissue was rinsed with physiologic saline (Solarbio), the tissues were randomly divided into two groups according to a random number table in a 1:1 ratio. One set of specimens (n = 6) was stored at -80°C for PCR and western blotting (WB), whereas the other specimens (n = 6) were fixed in 4% polyformaldehyde (Solarbio) and cut into 4.0-μm thick sections in preparation for paraffin embedding and pathologic staining, and stored at room temperature.

**Observation of wound images and the healing process**

The wound region was measured in ImageJ software (NIH, Bethesda, MD, USA) at 0, 3, 5, 7, and 9 days, and assessed with the following formula: wound healing percentage = [(premier wound part - wound part at measurement day)/incipient wound part] × 100%.

**Hematoxylin and eosin staining**

A hematoxylin and eosin staining kit was purchased from Solarbio. Tissues were dewaxed with xylene (Sinopharm Chemical Reagent Co., Ltd., Shanghai, China). Subsequently, the samples were hydrated with a graded alcohol series (100%, 90%, 80%, and 70%; Hangzhou Hongda Chemical & Instrument Co., Ltd., Hangzhou, China) and distilled water, then stained with hematoxylin for 3–5 min and with eosin for 2–5 min. Subsequently, the slices were dehydrated via a graded alcohol series (90% and 100%), rinsed with tap water, cleared three times with xylene for 2 min each, sealed with neutral gum (Sinopharm Chemical Reagent Co., Ltd., Beijing, China), and observed under a microscope (Nikon, Tokyo, Japan).

**Masson’s trichrome staining**

Wound tissue specimens were fixed, dehydrated, embedded, and sectioned. A Masson’s trichome staining kit was purchased from Solarbio. Paraffin-embedded sections were deparaffinized with xylene, stained in Weigert’s hematoxylin and Masson’s Ponceau-acid for 5–10 min each, placed in 1% phosphomolybdic-phosphotungstic acid solution for 1–2 min and 2% aniline blue for 1–2 min, then differentiated with 1% acetic acid solution for 1 min. Subsequently, the slices were quickly dehydrated in 95% ethyl alcohol (Shanghai Suyi Chemical Reagent Co., Ltd, Shanghai, China), cleared in xylene, and sealed with neutral gum.

**Immunohistochemistry**

The tissues were dewaxed twice in xylene for 8 min, and incubated in a graded ethanol series (100%, 85%, and 75%) for 5 min at each concentration, then washed three times independently in distilled water and phosphate buffered saline (PBS) (Haokebio Technology Co., Ltd., Hangzhou, China) for 3 min. Antigen retrieval was performed in Tris-EDTA buffer (pH 9.0; Haokebio Technology Co., Ltd.). Endogenous peroxidase activity was eliminated through incubation in 3% H2O2 solution at room temperature for 10 min, after which the slices were blocked with 3% BSA (Haokebio Technology Co., Ltd.) for 30 min at room temperature. The tissue slices were then incubated with the following primary antibodies: polyclonal rabbit anti-CXCL12 (1:100; Zen-Bioscience, Chengdu, China) and polyclonal rabbit anti-IGF1 (1:200; Affinity Biosciences, Changzhou, China) overnight at 4°C. The tissue slices were washed with PBS and incubated with secondary antibodies from a Mouse/Rabbit Enhanced Polymer Detection System (ZSGB-Bio; Beijing, China) for 50 min at room temperature. The sections were washed three times with PBS, incubated with 3,3´-diaminobenzidine for 5 min, and inspected under a microscope (Nikon). Stained areas were detected in ImageJ software.

**RT-qPCR**

Whole RNA was extracted from podal skin tissue with TRIzol (Biosharp, Hefei, China), with 1 mL reagent per 10–30 mg tissue. RNA purity and concentration were assessed with an ultraviolet spectrophotometer (Implen, Munich, Germany). The tissue was mixed with 0.2 mL of chloroform (Sinopharm Chemical Reagent Co., Ltd.), then centrifuged at 12,000 g for 15 min at 4℃. The top aqueous phase was collected and added to 500 μL isopropanol (Sinopharm Chemical Reagent Co., Ltd.) to precipitate RNA, after which the RNA was dissolved in 10–30 mL RNA enzyme-free water. Complete RNA was reverse transcribed into cDNA with a Hifair II 1st Strand cDNA Synthesis Kit (Yeasen Biotechnology Co., Ltd., Shanghai, China). RT-qPCR was applied to detect mRNA expression of target genes with SYBR Green qPCR Mix (Biosharp, Hefei, China). Relative mRNA levels were evaluated with the 2-△△Ct method with β-actin for normalization. RT-qPCR was performed with the primer sequences listed in Table S1.

**WB**

Tissue protein from wound tissues was isolated with radio immunoprecipitation assay buffer (Beyotime, Shanghai, China) including protease and phosphatase inhibitors, then centrifuged at 12,000 g for 10 min. The supernatant was transferred to a fresh tube. The topmost layer of lipid was removed, and a BCA Protein Assay Kit (Beyotime) was applied to determine protein concentrations. Nearly 30 μg protein lysate was loaded on a 10% SDS-PAGE gel, transferred to PVDF membranes, and blocked with 5% skim milk powder (Yili, Hohhot City, China) for 1 h. Next, primary antibodies comprised of anti-CXCL12 (1:1000; Zen-Bioscience), anti-IGF1 (1:500; Affinity Biosciences), and anti-β-actin (1:1000; Wanleibio, ShenYang, China) were incubated with the membrane at 4°C overnight, and washed three times with PBST (Biosharp), separated from primary antibody for 15 min. Secondary antibodies, goat anti-rabbit IgG H&L [HRP] (1:10000; ZSGB-Bio), were incubated with the membrane for 2 h at room temperature. Finally, the band intensities were determined in ImageJ software and visualized with a ChemiDoc XRS+ System (Bio-Rad, Hercules, CA, USA) and compared with β-actin expression.

**Statistical analysis**

Computations were performed by two researchers in a double-blinded manner. R software (version 4.2.2) and SPSS 25.0 (IBM, Chicago, IL, USA) were used for statistical analysis. Graphs were plotted in GraphPad Prism 9.2.0 (GraphPad Software, San Diego, CA, USA). The Kolmogorov-Smirnov or Shapiro-Wilk test was used to verify whether data followed a Gaussian distribution, according to sample size. Quantitative data meeting the requirements for normal distribution are expressed as mean ± standard deviation of three separate experimental outcomes. Differences between two groups were compared with two independent sample *t*-tests if the data for two samples were distributed normally, were independent, and had equal variance. Differences between the two groups were assayed with the Wilcoxon rank-sum test when the distribution of two samples was skewed. Fold-change (FC) = E1/E2, where E1 and E2 represent the arithmetic mean of the DFUs and NFUs, respectively. The mean optical density (MOD) = sum integrated optical density/sum area, which was determined in Image Pro Plus 6.0 (Media Cybernetics, Rockville Pike, MD, USA). A two-tailed *P* < 0.05 indicated a statistically significant difference.

**ⅡSupplemental figures**


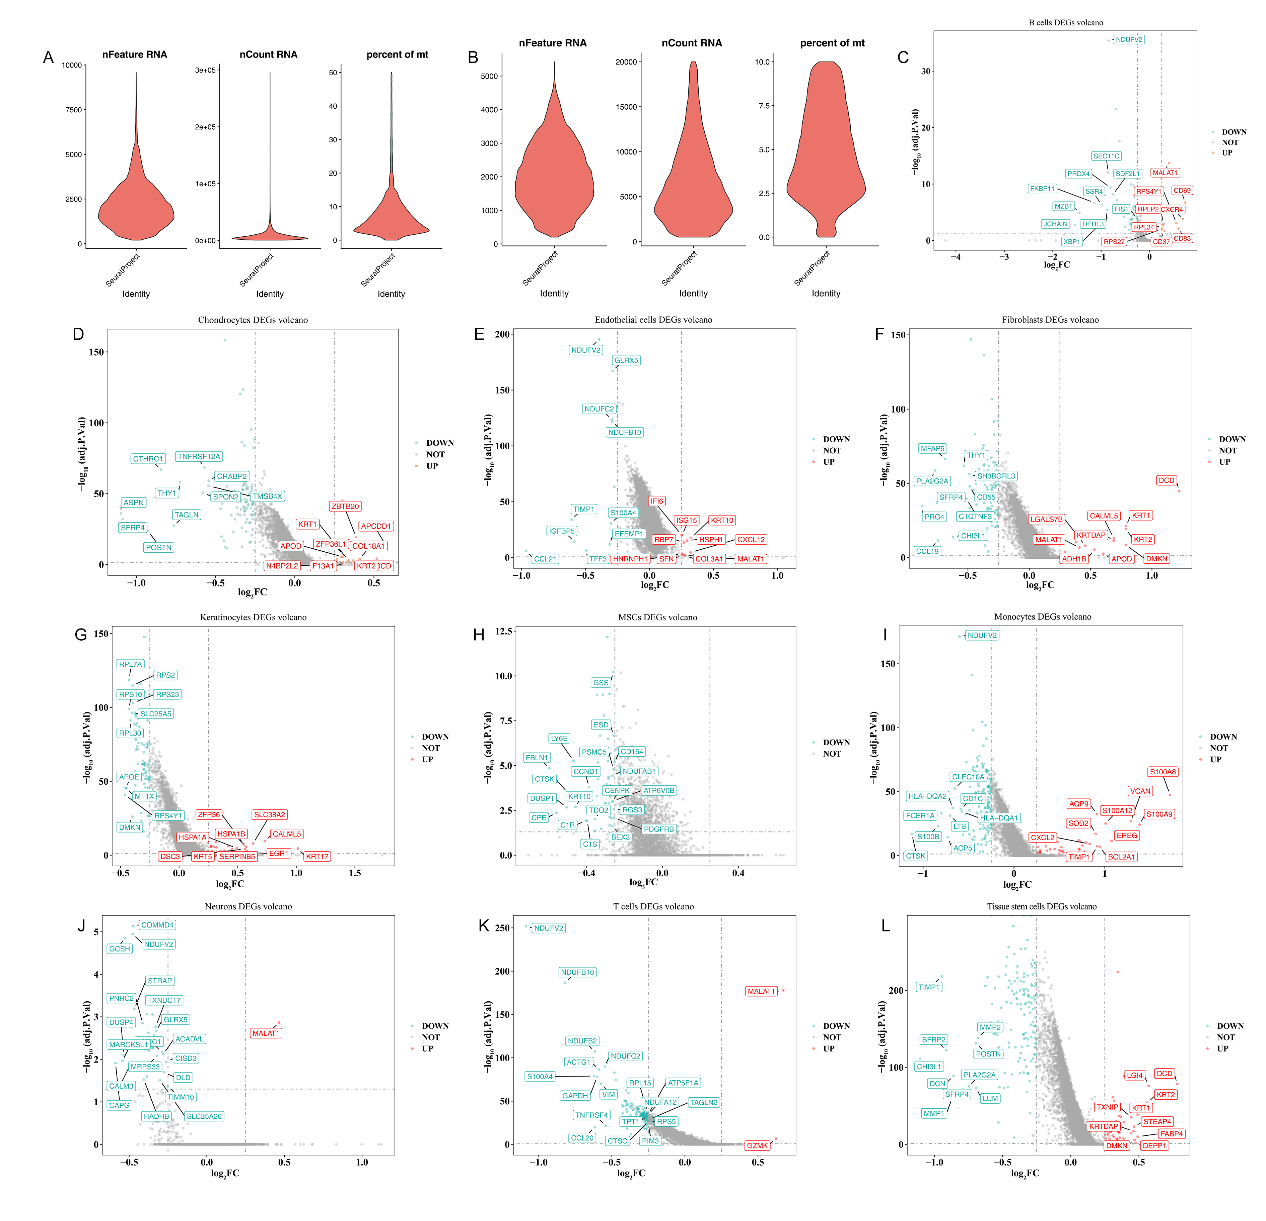


**Figure S1** Quality control for scRNASeq and volcano plots of DEGs.

A-B Before (A) and after (B) quality control. C-L Volcano plots of DEGs of B cells (C), chondrocytes (D), endothelial cells (E), fibroblasts (F), keratinocytes (G), MSCs (H), monocytes (I), neurons (J), T cells (K), and tissue stem cells (L).


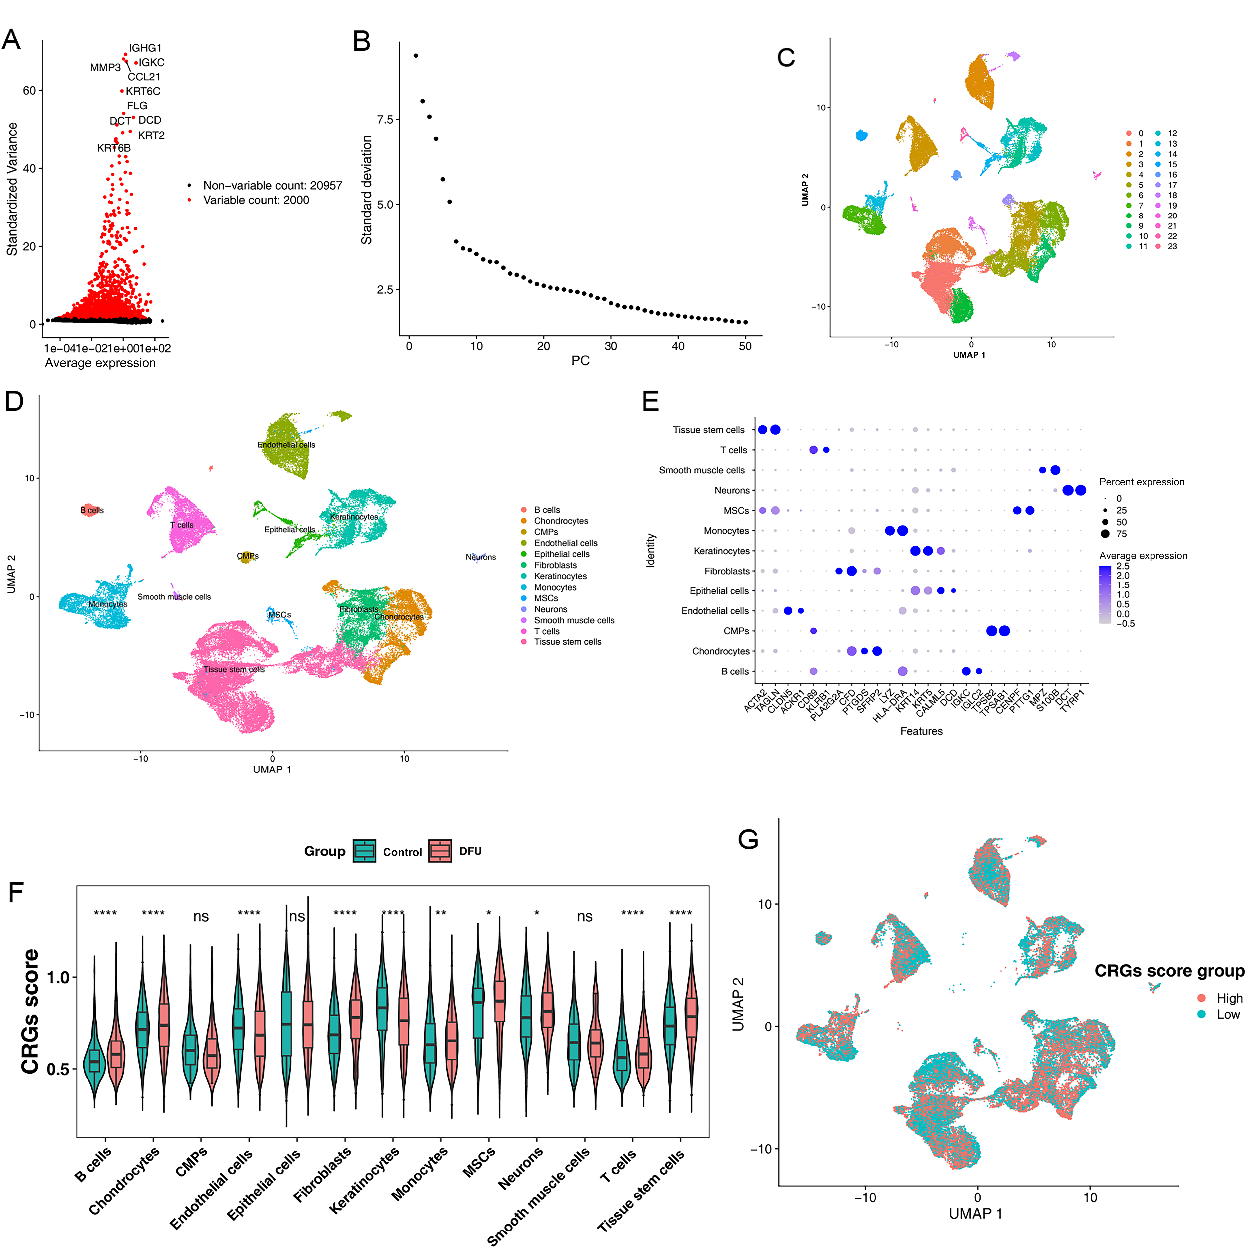


**Figure S2** Identification of DEGs.

**(**A) The top 2000 highly variable genes. (B) Scree plot of principal component analysis. (C) UMAP plot. (D) Annotation of single-cell transcriptomic maps. E-F Marker gene expression (E) and divergent analysis of CRG scores in diacritical cell types (F). (G) Cell distribution according to CRG score.


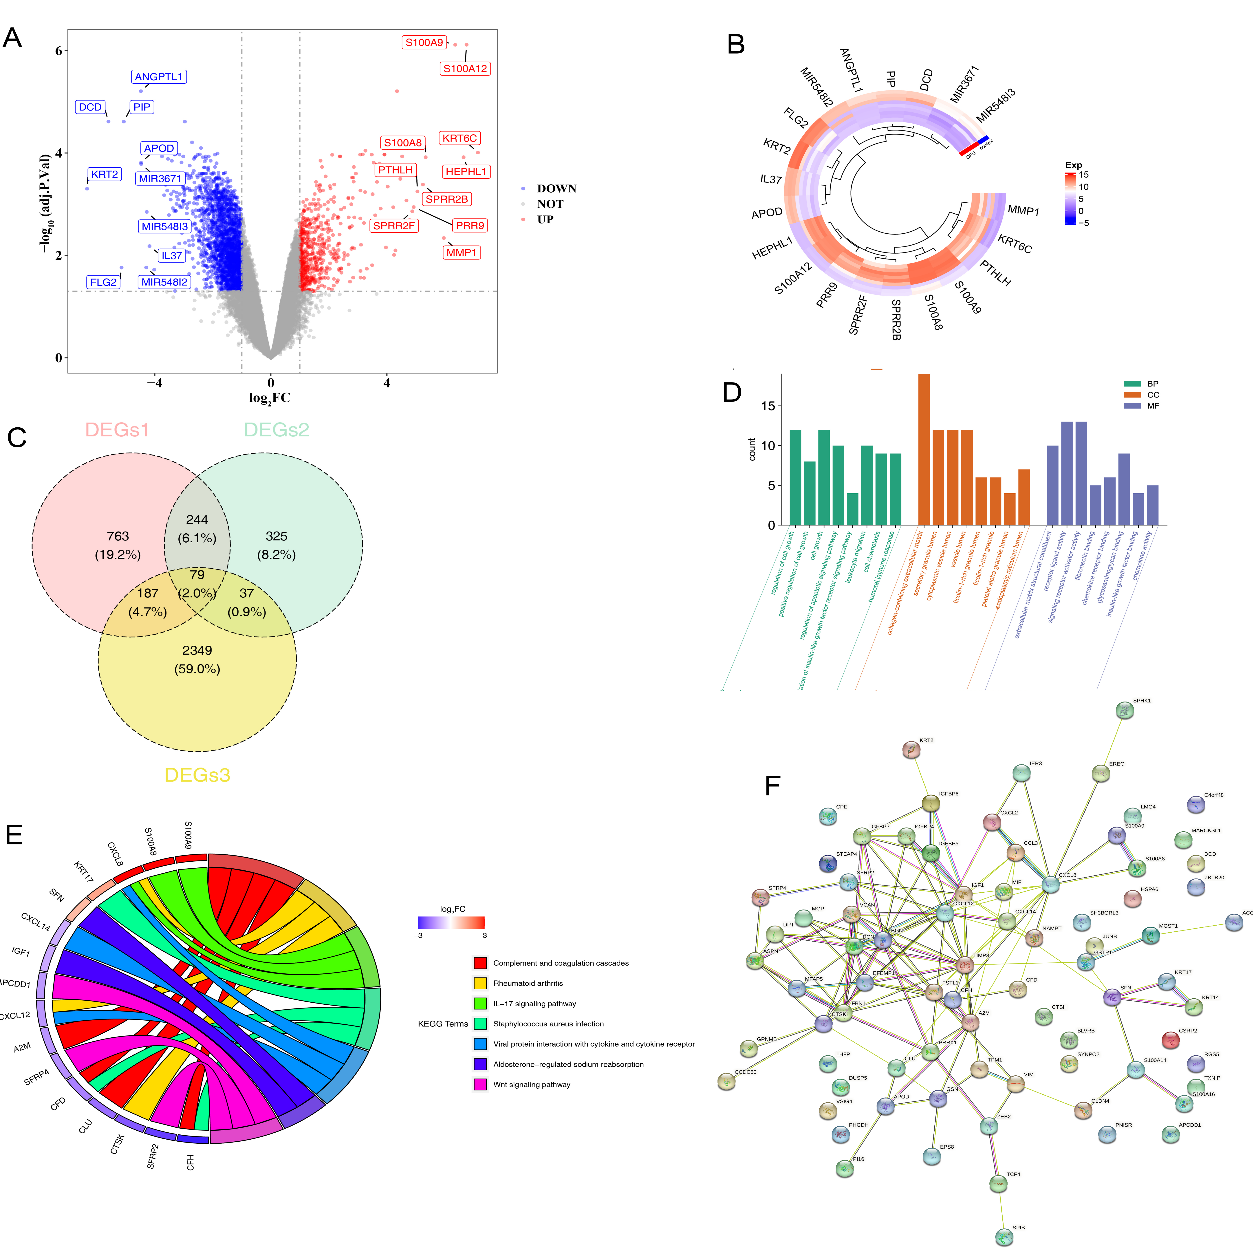


**Figure S3** Seventy-nine candidate genes.

A-C Volcano plot (A), circular heatmap (B), and Venn diagram (C). D-F GO (D) and KEGG (E) enrichment analyses, and (F) PPI network.


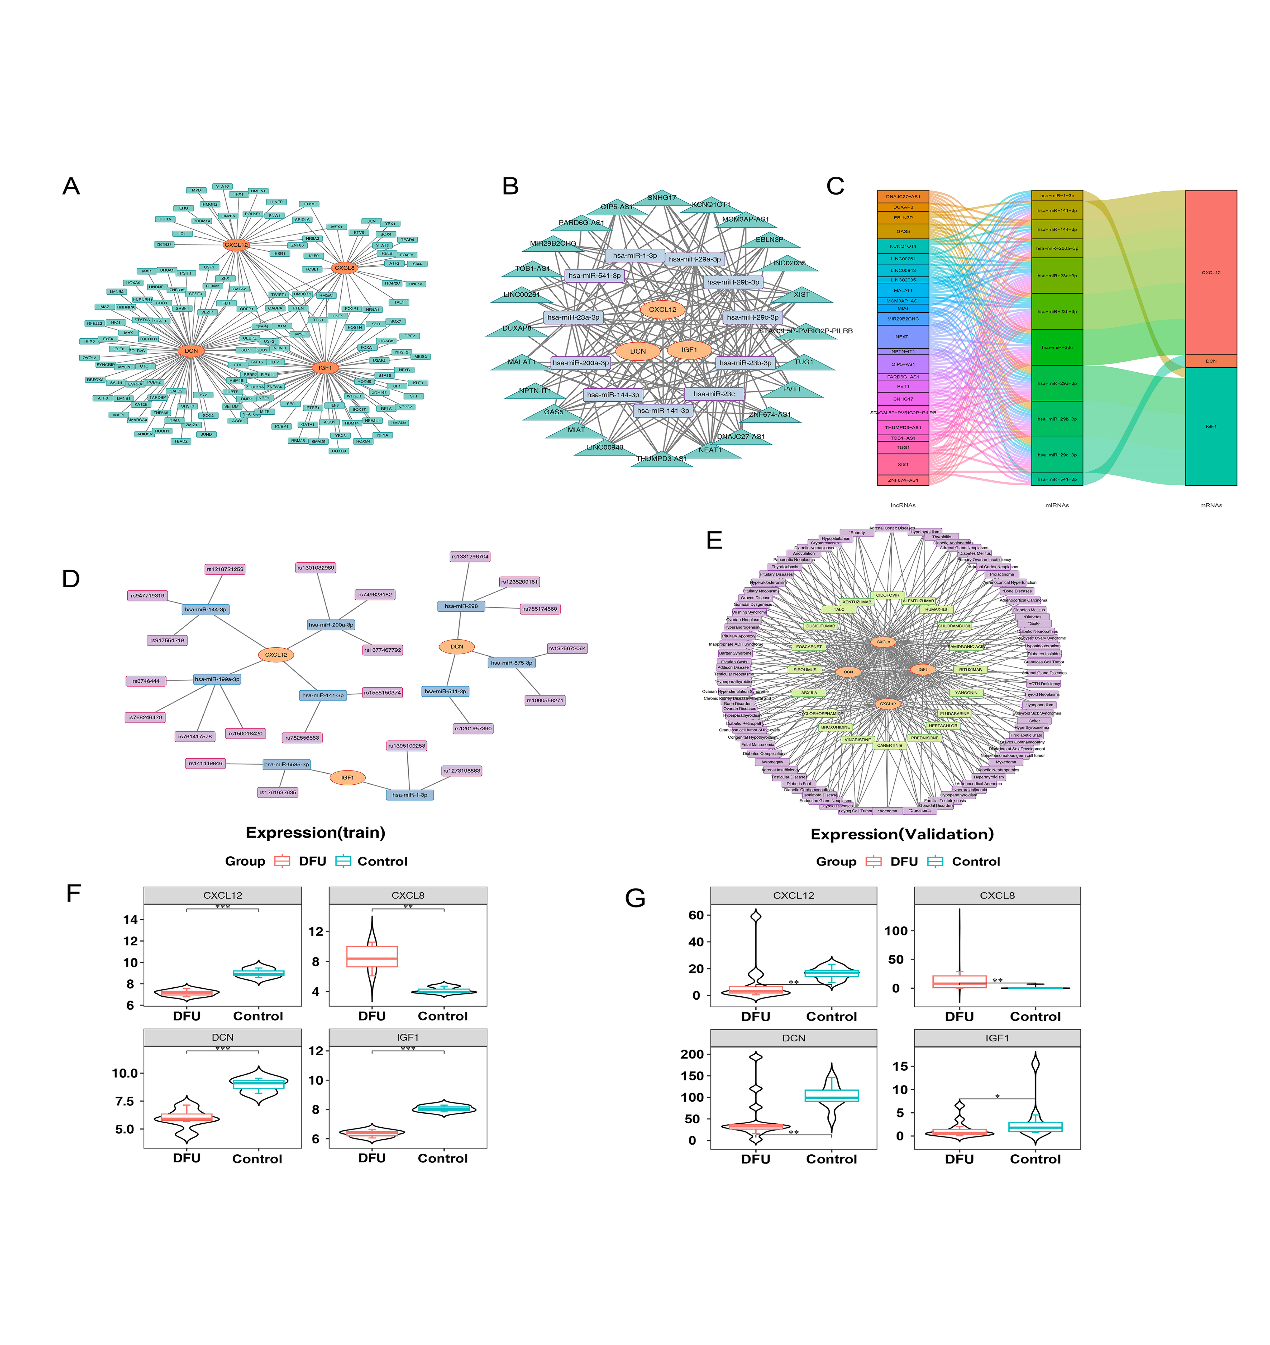
**Figure S4** Meshwork and expression levels of hub genes.

A-E TF (A), ceRNA (B-C), miRNA-SNP (D), and medication-malady network (E). Expression levels of hub genes in the training (F) and validation sets (G). * *P* < 0.05, ** *P* < 0.01, *** *P* < 0.001 vs. control.


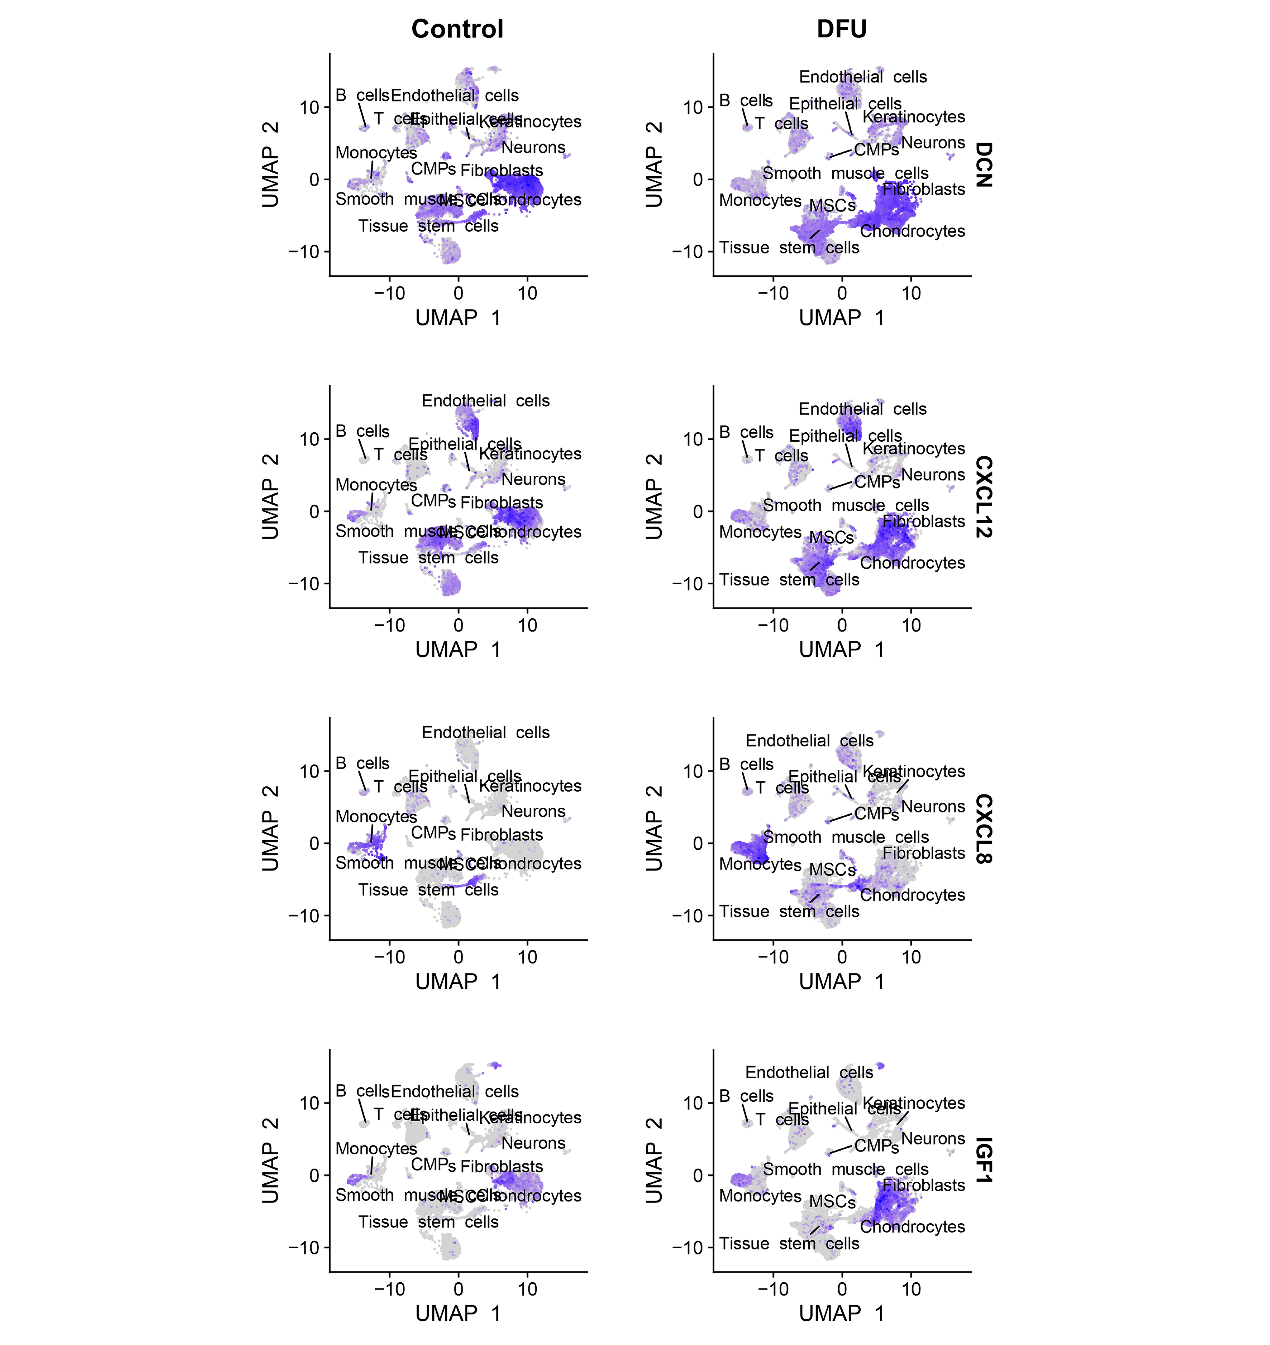


**Figure S5** Cell distribution of four hub genes between DFUs and controls.

III **Supplemental Tables**

**Table S1** Primer sequence

| Gene | Forward 5’–3’ | Reverse 5’–3’ |
| --- | --- | --- |
| Rat-β-actin | CTTCCTGGGTATGGAATCCT | TCTTTACGGATGTCAACGTC |
| Rat-CXCL8 | TGTGCCCTTCAGATTGTTGC | GCCCTTCCCTAACACTGACT |
| Rat-CXCL12 | TGCAGTGTTCTGATCTGGGT | AATGCCTCTGGGCTGATCTT |
| Rat-DCN | GGAAGCTGCAAAGGAGAAGG | ATTTGGCAGGTGTTCCGATG |
| Rat-IGF1 | TTTCAGAGACAGCAGAGCACACAA | CACACAGAGCTGCAGAAATCAGG |

| Table S2 GO enrichment analysis | | | | |  | | |  | |  | | |  | |  |  | |  | |  |  |
| --- | --- | --- | --- | --- | --- | --- | --- | --- | --- | --- | --- | --- | --- | --- | --- | --- | --- | --- | --- | --- | --- |
|  | | |  |  |  | | |  | |  | | |  | |  |  | |  | |  |  |
| ONTOLOGY | ID | Description | | | | GeneRatio | BgRatio | | *P* | | *Padj* | q-value | | geneID | | | Count | |
| BP | GO:0001558 | regulation of cell growth | | | | 12/75 | 422/18903 | | 9.62E-08 | | 0.00019 | 0.000143 | | S100A9/S100A8/IGF1/CXCL12/SFRP2/IGFBP5/KRT17/SFN/SPHK1/IGFBP4/PI16/IGFBP7 | | | 12 | |
| BP | GO:0030307 | positive regulation of cell growth | | | | 8/75 | 167/18903 | | 3.20E-07 | | 0.000316 | 0.000239 | | S100A9/S100A8/IGF1/CXCL12/SFRP2/KRT17/SFN/SPHK1 | | | 8 | |
| BP | GO:0016049 | cell growth | | | | 12/75 | 493/18903 | | 5.09E-07 | | 0.000335 | 0.000253 | | S100A9/S100A8/IGF1/CXCL12/SFRP2/IGFBP5/KRT17/SFN/SPHK1/IGFBP4/PI16/IGFBP7 | | | 12 | |
| BP | GO:2001233 | regulation of apoptotic signaling pathway | | | | 10/75 | 374/18903 | | 2.15E-06 | | 0.000952 | 0.00072 | | S100A9/S100A8/IGF1/CXCL12/SFRP2/GSTP1/MIF/CLU/TIMP3/CTSH | | | 10 | |
| BP | GO:0043567 | regulation of insulin-like growth factor receptor signaling pathway | | | | 4/75 | 25/18903 | | 2.71E-06 | | 0.000952 | 0.00072 | | IGF1/IGFBP5/IGFBP6/IGFBP4 | | | 4 | |
| BP | GO:0050900 | leukocyte migration | | | | 10/75 | 398/18903 | | 3.75E-06 | | 0.000952 | 0.00072 | | S100A9/S100A8/APOD/EPS8/CXCL12/S100A14/MIF/CXCL8/CXCL2/CCL3 | | | 10 | |
| BP | GO:0060326 | cell chemotaxis | | | | 9/75 | 319/18903 | | 4.69E-06 | | 0.000952 | 0.00072 | | S100A9/S100A8/CXCL12/S100A14/MIF/CXCL8/CXCL2/CXCL14/CCL3 | | | 9 | |
| BP | GO:0006959 | humoral immune response | | | | 9/75 | 320/18903 | | 4.81E-06 | | 0.000952 | 0.00072 | | S100A9/CFH/CLU/CXCL8/CXCL2/CFD/A2M/CXCL14/VSIG4 | | | 9 | |
| BP | GO:0030595 | leukocyte chemotaxis | | | | 8/75 | 240/18903 | | 4.87E-06 | | 0.000952 | 0.00072 | | S100A9/S100A8/CXCL12/S100A14/MIF/CXCL8/CXCL2/CCL3 | | | 8 | |
| BP | GO:0097529 | myeloid leukocyte migration | | | | 8/75 | 242/18903 | | 5.18E-06 | | 0.000952 | 0.00072 | | S100A9/S100A8/CXCL12/S100A14/MIF/CXCL8/CXCL2/CCL3 | | | 8 | |
| BP | GO:0050918 | positive chemotaxis | | | | 5/75 | 64/18903 | | 5.46E-06 | | 0.000952 | 0.00072 | | CXCL12/MIF/CXCL8/CCL3/GPNMB | | | 5 | |
| BP | GO:1902230 | negative regulation of intrinsic apoptotic signaling pathway in response to DNA damage | | | | 4/75 | 30/18903 | | 5.79E-06 | | 0.000952 | 0.00072 | | CXCL12/SFRP2/MIF/CLU | | | 4 | |
| BP | GO:0032496 | response to lipopolysaccharide | | | | 9/75 | 339/18903 | | 7.66E-06 | | 0.001095 | 0.000828 | | S100A9/S100A8/S100A14/GSTP1/MIF/CXCL8/CXCL2/VIM/CCL3 | | | 9 | |
| BP | GO:0032640 | tumor necrosis factor production | | | | 7/75 | 184/18903 | | 8.39E-06 | | 0.001095 | 0.000828 | | ZBTB20/IGF1/GSTP1/MIF/CLU/CCL3/GPNMB | | | 7 | |
| BP | GO:0032680 | regulation of tumor necrosis factor production | | | | 7/75 | 184/18903 | | 8.39E-06 | | 0.001095 | 0.000828 | | ZBTB20/IGF1/GSTP1/MIF/CLU/CCL3/GPNMB | | | 7 | |
| BP | GO:0045927 | positive regulation of growth | | | | 8/75 | 261/18903 | | 9.01E-06 | | 0.001095 | 0.000828 | | S100A9/S100A8/IGF1/CXCL12/SFRP2/KRT17/SFN/SPHK1 | | | 8 | |
| BP | GO:0071706 | tumor necrosis factor superfamily cytokine production | | | | 7/75 | 189/18903 | | 9.99E-06 | | 0.001095 | 0.000828 | | ZBTB20/IGF1/GSTP1/MIF/CLU/CCL3/GPNMB | | | 7 | |
| BP | GO:1903555 | regulation of tumor necrosis factor superfamily cytokine production | | | | 7/75 | 189/18903 | | 9.99E-06 | | 0.001095 | 0.000828 | | ZBTB20/IGF1/GSTP1/MIF/CLU/CCL3/GPNMB | | | 7 | |
| BP | GO:0002237 | response to molecule of bacterial origin | | | | 9/75 | 360/18903 | | 1.24E-05 | | 0.001171 | 0.000885 | | S100A9/S100A8/S100A14/GSTP1/MIF/CXCL8/CXCL2/VIM/CCL3 | | | 9 | |
| BP | GO:0071621 | granulocyte chemotaxis | | | | 6/75 | 130/18903 | | 1.29E-05 | | 0.001171 | 0.000885 | | S100A9/S100A8/S100A14/CXCL8/CXCL2/CCL3 | | | 6 | |
| BP | GO:0008544 | epidermis development | | | | 9/75 | 362/18903 | | 1.29E-05 | | 0.001171 | 0.000885 | | KRT2/IGFBP5/EREG/KRT17/TXNIP/KRT14/SFN/APCDD1/SFRP4 | | | 9 | |
| BP | GO:0052547 | regulation of peptidase activity | | | | 10/75 | 459/18903 | | 1.31E-05 | | 0.001171 | 0.000885 | | S100A9/S100A8/CLDN4/SFRP2/SFN/A2M/TIMP3/CTSH/GSN/PI16 | | | 10 | |
| BP | GO:0048009 | insulin-like growth factor receptor signaling pathway | | | | 4/75 | 38/18903 | | 1.52E-05 | | 0.001251 | 0.000947 | | IGF1/IGFBP5/IGFBP6/IGFBP4 | | | 4 | |
| BP | GO:1902229 | regulation of intrinsic apoptotic signaling pathway in response to DNA damage | | | | 4/75 | 38/18903 | | 1.52E-05 | | 0.001251 | 0.000947 | | CXCL12/SFRP2/MIF/CLU | | | 4 | |
| BP | GO:0043568 | positive regulation of insulin-like growth factor receptor signaling pathway | | | | 3/75 | 13/18903 | | 1.67E-05 | | 0.001315 | 0.000995 | | IGF1/IGFBP5/IGFBP4 | | | 3 | |
| BP | GO:0048145 | regulation of fibroblast proliferation | | | | 5/75 | 87/18903 | | 2.46E-05 | | 0.001868 | 0.001413 | | IGF1/GSTP1/EREG/MIF/SPHK1 | | | 5 | |
| BP | GO:0043588 | skin development | | | | 8/75 | 302/18903 | | 2.58E-05 | | 0.001884 | 0.001425 | | KRT2/CLDN4/IGFBP5/EREG/KRT17/TXNIP/SFN/APCDD1 | | | 8 | |
| BP | GO:0097530 | granulocyte migration | | | | 6/75 | 158/18903 | | 3.88E-05 | | 0.002732 | 0.002067 | | S100A9/S100A8/S100A14/CXCL8/CXCL2/CCL3 | | | 6 | |
| BP | GO:0006957 | complement activation, alternative pathway | | | | 3/75 | 18/18903 | | 4.69E-05 | | 0.003189 | 0.002412 | | CFH/CFD/VSIG4 | | | 3 | |
| BP | GO:0001503 | ossification | | | | 9/75 | 429/18903 | | 4.90E-05 | | 0.003223 | 0.002438 | | IGF1/MGP/SFRP2/IGFBP5/JUNB/CTSK/VCAN/CCL3/ASPN | | | 9 | |
| BP | GO:0008630 | intrinsic apoptotic signaling pathway in response to DNA damage | | | | 5/75 | 102/18903 | | 5.30E-05 | | 0.003373 | 0.002551 | | CXCL12/SFRP2/MIF/CLU/SFN | | | 5 | |
| BP | GO:0048144 | fibroblast proliferation | | | | 5/75 | 103/18903 | | 5.56E-05 | | 0.003423 | 0.002589 | | IGF1/GSTP1/EREG/MIF/SPHK1 | | | 5 | |
| BP | GO:0048146 | positive regulation of fibroblast proliferation | | | | 4/75 | 53/18903 | | 5.78E-05 | | 0.003452 | 0.002611 | | IGF1/EREG/MIF/SPHK1 | | | 4 | |
| BP | GO:0070371 | ERK1 and ERK2 cascade | | | | 8/75 | 340/18903 | | 5.97E-05 | | 0.003461 | 0.002618 | | IGF1/GSTP1/MIF/DUSP5/TIMP3/CTSH/CCL3/GPNMB | | | 8 | |
| BP | GO:2001242 | regulation of intrinsic apoptotic signaling pathway | | | | 6/75 | 172/18903 | | 6.23E-05 | | 0.00349 | 0.00264 | | S100A9/S100A8/CXCL12/SFRP2/MIF/CLU | | | 6 | |
| BP | GO:0030593 | neutrophil chemotaxis | | | | 5/75 | 106/18903 | | 6.37E-05 | | 0.00349 | 0.00264 | | S100A9/S100A8/CXCL8/CXCL2/CCL3 | | | 5 | |
| BP | GO:0042116 | macrophage activation | | | | 5/75 | 109/18903 | | 7.28E-05 | | 0.003879 | 0.002934 | | MIF/CLU/SPHK1/VSIG4/CCL3 | | | 5 | |
| BP | GO:0071216 | cellular response to biotic stimulus | | | | 7/75 | 261/18903 | | 7.87E-05 | | 0.004085 | 0.00309 | | GSTP1/TXNIP/MIF/CXCL8/CXCL2/VIM/CCL3 | | | 7 | |
| BP | GO:0030449 | regulation of complement activation | | | | 3/75 | 22/18903 | | 8.75E-05 | | 0.004425 | 0.003347 | | CFH/A2M/VSIG4 | | | 3 | |
| BP | GO:0021782 | glial cell development | | | | 5/75 | 117/18903 | | 0.000102 | | 0.005021 | 0.003798 | | S100A9/S100A8/CLU/VIM/PHGDH | | | 5 | |
| BP | GO:0043030 | regulation of macrophage activation | | | | 4/75 | 62/18903 | | 0.000107 | | 0.005152 | 0.003897 | | MIF/SPHK1/VSIG4/CCL3 | | | 4 | |
| BP | GO:0010952 | positive regulation of peptidase activity | | | | 6/75 | 194/18903 | | 0.000121 | | 0.005679 | 0.004296 | | S100A9/S100A8/CLDN4/SFRP2/CTSH/GSN | | | 6 | |
| BP | GO:0051216 | cartilage development | | | | 6/75 | 201/18903 | | 0.000147 | | 0.006716 | 0.00508 | | MGP/SFRP2/PRRX1/CTSK/BGN/EFEMP1 | | | 6 | |
| BP | GO:0002688 | regulation of leukocyte chemotaxis | | | | 5/75 | 127/18903 | | 0.00015 | | 0.006716 | 0.00508 | | CXCL12/S100A14/MIF/CXCL8/CCL3 | | | 5 | |
| BP | GO:0045109 | intermediate filament organization | | | | 4/75 | 69/18903 | | 0.000163 | | 0.007005 | 0.005299 | | KRT2/KRT17/KRT14/VIM | | | 4 | |
| BP | GO:0043281 | regulation of cysteine-type endopeptidase activity involved in apoptotic process | | | | 6/75 | 205/18903 | | 0.000163 | | 0.007005 | 0.005299 | | S100A9/S100A8/SFRP2/SFN/CTSH/GSN | | | 6 | |
| BP | GO:1990266 | neutrophil migration | | | | 5/75 | 130/18903 | | 0.000167 | | 0.007014 | 0.005305 | | S100A9/S100A8/CXCL8/CXCL2/CCL3 | | | 5 | |
| BP | GO:0097193 | intrinsic apoptotic signaling pathway | | | | 7/75 | 298/18903 | | 0.000179 | | 0.007226 | 0.005465 | | S100A9/S100A8/CXCL12/SFRP2/MIF/CLU/SFN | | | 7 | |
| BP | GO:0006956 | complement activation | | | | 5/75 | 132/18903 | | 0.00018 | | 0.007226 | 0.005465 | | CFH/CLU/CFD/A2M/VSIG4 | | | 5 | |
| BP | GO:0150076 | neuroinflammatory response | | | | 4/75 | 73/18903 | | 0.000202 | | 0.007976 | 0.006033 | | IGF1/CLU/SPHK1/CCL3 | | | 4 | |
| BP | GO:0042063 | gliogenesis | | | | 7/75 | 310/18903 | | 0.000228 | | 0.008814 | 0.006666 | | S100A9/S100A8/CLU/VIM/APCDD1/PHGDH/CCL3 | | | 7 | |
| BP | GO:0071222 | cellular response to lipopolysaccharide | | | | 6/75 | 222/18903 | | 0.000251 | | 0.009533 | 0.007211 | | GSTP1/MIF/CXCL8/CXCL2/VIM/CCL3 | | | 6 | |
| BP | GO:0052548 | regulation of endopeptidase activity | | | | 8/75 | 428/18903 | | 0.00029 | | 0.010785 | 0.008157 | | S100A9/S100A8/SFRP2/SFN/A2M/TIMP3/CTSH/GSN | | | 8 | |
| BP | GO:0045684 | positive regulation of epidermis development | | | | 3/75 | 33/18903 | | 0.0003 | | 0.010821 | 0.008185 | | KRT2/SFN/SFRP4 | | | 3 | |
| BP | GO:0061844 | antimicrobial humoral immune response mediated by antimicrobial peptide | | | | 4/75 | 81/18903 | | 0.000302 | | 0.010821 | 0.008185 | | S100A9/CXCL8/CXCL2/CXCL14 | | | 4 | |
| BP | GO:0002685 | regulation of leukocyte migration | | | | 6/75 | 231/18903 | | 0.000311 | | 0.010944 | 0.008278 | | APOD/CXCL12/S100A14/MIF/CXCL8/CCL3 | | | 6 | |
| BP | GO:2001021 | negative regulation of response to DNA damage stimulus | | | | 4/75 | 82/18903 | | 0.000316 | | 0.010944 | 0.008278 | | CXCL12/SFRP2/MIF/CLU | | | 4 | |
| BP | GO:2001234 | negative regulation of apoptotic signaling pathway | | | | 6/75 | 233/18903 | | 0.000326 | | 0.011022 | 0.008337 | | IGF1/CXCL12/SFRP2/GSTP1/MIF/CLU | | | 6 | |
| BP | GO:0071219 | cellular response to molecule of bacterial origin | | | | 6/75 | 234/18903 | | 0.000333 | | 0.011022 | 0.008337 | | GSTP1/MIF/CXCL8/CXCL2/VIM/CCL3 | | | 6 | |
| BP | GO:0009913 | epidermal cell differentiation | | | | 6/75 | 235/18903 | | 0.000341 | | 0.011022 | 0.008337 | | KRT2/EREG/KRT17/TXNIP/SFN/SFRP4 | | | 6 | |
| BP | GO:2000116 | regulation of cysteine-type endopeptidase activity | | | | 6/75 | 235/18903 | | 0.000341 | | 0.011022 | 0.008337 | | S100A9/S100A8/SFRP2/SFN/CTSH/GSN | | | 6 | |
| BP | GO:0002274 | myeloid leukocyte activation | | | | 6/75 | 237/18903 | | 0.000357 | | 0.011218 | 0.008485 | | MIF/CLU/CXCL8/SPHK1/VSIG4/CCL3 | | | 6 | |
| BP | GO:0048048 | embryonic eye morphogenesis | | | | 3/75 | 35/18903 | | 0.000358 | | 0.011218 | 0.008485 | | FBN1/MFAP5/EFEMP1 | | | 3 | |
| BP | GO:0090287 | regulation of cellular response to growth factor stimulus | | | | 7/75 | 338/18903 | | 0.000385 | | 0.011827 | 0.008946 | | ZEB2/FBN1/SFRP2/DCN/FSTL1/SFRP4/ASPN | | | 7 | |
| BP | GO:0018149 | peptide cross-linking | | | | 3/75 | 36/18903 | | 0.00039 | | 0.011827 | 0.008946 | | KRT2/DCN/BGN | | | 3 | |
| BP | GO:0002683 | negative regulation of immune system process | | | | 8/75 | 449/18903 | | 0.000399 | | 0.011926 | 0.00902 | | APOD/CXCL12/FBN1/MIF/A2M/VSIG4/CCL3/GPNMB | | | 8 | |
| BP | GO:0045104 | intermediate filament cytoskeleton organization | | | | 4/75 | 89/18903 | | 0.000432 | | 0.012608 | 0.009536 | | KRT2/KRT17/KRT14/VIM | | | 4 | |
| BP | GO:0001649 | osteoblast differentiation | | | | 6/75 | 246/18903 | | 0.000435 | | 0.012608 | 0.009536 | | IGF1/SFRP2/IGFBP5/JUNB/VCAN/CCL3 | | | 6 | |
| BP | GO:0045103 | intermediate filament-based process | | | | 4/75 | 90/18903 | | 0.000451 | | 0.012711 | 0.009614 | | KRT2/KRT17/KRT14/VIM | | | 4 | |
| BP | GO:0070098 | chemokine-mediated signaling pathway | | | | 4/75 | 90/18903 | | 0.000451 | | 0.012711 | 0.009614 | | CXCL12/CXCL8/CXCL2/CCL3 | | | 4 | |
| BP | GO:0070661 | leukocyte proliferation | | | | 7/75 | 348/18903 | | 0.000458 | | 0.012716 | 0.009618 | | IGF1/GSTP1/JUNB/MIF/CLU/VSIG4/GPNMB | | | 7 | |
| BP | GO:0032103 | positive regulation of response to external stimulus | | | | 8/75 | 464/18903 | | 0.000496 | | 0.013589 | 0.010278 | | S100A9/S100A8/CXCL12/S100A14/EREG/MIF/CXCL8/CCL3 | | | 8 | |
| BP | GO:0097305 | response to alcohol | | | | 6/75 | 253/18903 | | 0.000504 | | 0.013621 | 0.010303 | | S100A8/EPS8/CTSK/A2M/CCL3/IGFBP7 | | | 6 | |
| BP | GO:0150077 | regulation of neuroinflammatory response | | | | 3/75 | 41/18903 | | 0.000574 | | 0.015144 | 0.011455 | | IGF1/SPHK1/CCL3 | | | 3 | |
| BP | GO:0030216 | keratinocyte differentiation | | | | 5/75 | 170/18903 | | 0.000576 | | 0.015144 | 0.011455 | | KRT2/EREG/KRT17/TXNIP/SFN | | | 5 | |
| BP | GO:0002690 | positive regulation of leukocyte chemotaxis | | | | 4/75 | 97/18903 | | 0.000599 | | 0.015205 | 0.011501 | | CXCL12/S100A14/CXCL8/CCL3 | | | 4 | |
| BP | GO:0014002 | astrocyte development | | | | 3/75 | 42/18903 | | 0.000616 | | 0.015205 | 0.011501 | | S100A9/S100A8/VIM | | | 3 | |
| BP | GO:1990868 | response to chemokine | | | | 4/75 | 98/18903 | | 0.000623 | | 0.015205 | 0.011501 | | CXCL12/CXCL8/CXCL2/CCL3 | | | 4 | |
| BP | GO:1990869 | cellular response to chemokine | | | | 4/75 | 98/18903 | | 0.000623 | | 0.015205 | 0.011501 | | CXCL12/CXCL8/CXCL2/CCL3 | | | 4 | |
| BP | GO:0050673 | epithelial cell proliferation | | | | 8/75 | 481/18903 | | 0.000628 | | 0.015205 | 0.011501 | | IGF1/KRT2/CXCL12/SFRP2/IGFBP5/EREG/SFN/IGFBP4 | | | 8 | |
| BP | GO:0030336 | negative regulation of cell migration | | | | 7/75 | 368/18903 | | 0.000638 | | 0.015205 | 0.011501 | | APOD/CXCL12/TPM1/SFRP2/IGFBP5/DCN/MIF | | | 7 | |
| BP | GO:0010950 | positive regulation of endopeptidase activity | | | | 5/75 | 174/18903 | | 0.00064 | | 0.015205 | 0.011501 | | S100A9/S100A8/SFRP2/CTSH/GSN | | | 5 | |
| BP | GO:0030178 | negative regulation of Wnt signaling pathway | | | | 5/75 | 174/18903 | | 0.00064 | | 0.015205 | 0.011501 | | SFRP2/IGFBP6/IGFBP4/APCDD1/SFRP4 | | | 5 | |
| BP | GO:0048660 | regulation of smooth muscle cell proliferation | | | | 5/75 | 175/18903 | | 0.000657 | | 0.015419 | 0.011663 | | APOD/IGF1/TPM1/IGFBP5/EREG | | | 5 | |
| BP | GO:0045862 | positive regulation of proteolysis | | | | 7/75 | 372/18903 | | 0.00068 | | 0.015772 | 0.01193 | | S100A9/S100A8/CLDN4/SFRP2/CLU/CTSH/GSN | | | 7 | |
| BP | GO:2001243 | negative regulation of intrinsic apoptotic signaling pathway | | | | 4/75 | 101/18903 | | 0.000698 | | 0.015998 | 0.0121 | | CXCL12/SFRP2/MIF/CLU | | | 4 | |
| BP | GO:0045840 | positive regulation of mitotic nuclear division | | | | 3/75 | 44/18903 | | 0.000707 | | 0.016022 | 0.012118 | | IGF1/EREG/SPHK1 | | | 3 | |
| BP | GO:0048659 | smooth muscle cell proliferation | | | | 5/75 | 179/18903 | | 0.000727 | | 0.016299 | 0.012328 | | APOD/IGF1/TPM1/IGFBP5/EREG | | | 5 | |
| BP | GO:0061448 | connective tissue development | | | | 6/75 | 274/18903 | | 0.000766 | | 0.016964 | 0.012831 | | MGP/SFRP2/PRRX1/CTSK/BGN/EFEMP1 | | | 6 | |
| BP | GO:0002920 | regulation of humoral immune response | | | | 3/75 | 46/18903 | | 0.000806 | | 0.017301 | 0.013086 | | CFH/A2M/VSIG4 | | | 3 | |
| BP | GO:2000146 | negative regulation of cell motility | | | | 7/75 | 383/18903 | | 0.000807 | | 0.017301 | 0.013086 | | APOD/CXCL12/TPM1/SFRP2/IGFBP5/DCN/MIF | | | 7 | |
| BP | GO:0032760 | positive regulation of tumor necrosis factor production | | | | 4/75 | 105/18903 | | 0.000807 | | 0.017301 | 0.013086 | | ZBTB20/MIF/CLU/CCL3 | | | 4 | |
| BP | GO:0048563 | post-embryonic animal organ morphogenesis | | | | 2/75 | 11/18903 | | 0.000835 | | 0.0177 | 0.013388 | | FBN1/EFEMP1 | | | 2 | |
| BP | GO:0001774 | microglial cell activation | | | | 3/75 | 47/18903 | | 0.000858 | | 0.018001 | 0.013615 | | CLU/SPHK1/CCL3 | | | 3 | |
| BP | GO:0007178 | transmembrane receptor protein serine/threonine kinase signaling pathway | | | | 7/75 | 390/18903 | | 0.000897 | | 0.018614 | 0.014079 | | ZEB2/FBN1/SFRP2/FSTL1/VIM/SFRP4/ASPN | | | 7 | |
| BP | GO:1903557 | positive regulation of tumor necrosis factor superfamily cytokine production | | | | 4/75 | 109/18903 | | 0.000928 | | 0.019067 | 0.014422 | | ZBTB20/MIF/CLU/CCL3 | | | 4 | |
| BP | GO:0030510 | regulation of BMP signaling pathway | | | | 4/75 | 111/18903 | | 0.000993 | | 0.019786 | 0.014965 | | FBN1/SFRP2/FSTL1/SFRP4 | | | 4 | |
| BP | GO:0032611 | interleukin-1 beta production | | | | 4/75 | 111/18903 | | 0.000993 | | 0.019786 | 0.014965 | | IGF1/GSTP1/SPHK1/CCL3 | | | 4 | |
| BP | GO:0032651 | regulation of interleukin-1 beta production | | | | 4/75 | 111/18903 | | 0.000993 | | 0.019786 | 0.014965 | | IGF1/GSTP1/SPHK1/CCL3 | | | 4 | |
| BP | GO:0090092 | regulation of transmembrane receptor protein serine/threonine kinase signaling pathway | | | | 6/75 | 290/18903 | | 0.001027 | | 0.020079 | 0.015187 | | ZEB2/FBN1/SFRP2/FSTL1/SFRP4/ASPN | | | 6 | |
| BP | GO:0002269 | leukocyte activation involved in inflammatory response | | | | 3/75 | 50/18903 | | 0.001028 | | 0.020079 | 0.015187 | | CLU/SPHK1/CCL3 | | | 3 | |
| BP | GO:0009408 | response to heat | | | | 4/75 | 114/18903 | | 0.001097 | | 0.021206 | 0.01604 | | IGF1/CXCL12/HSPA6/IGFBP7 | | | 4 | |
| BP | GO:0042303 | molting cycle | | | | 4/75 | 115/18903 | | 0.001133 | | 0.021484 | 0.01625 | | IGFBP5/KRT17/KRT14/APCDD1 | | | 4 | |
| BP | GO:0042633 | hair cycle | | | | 4/75 | 115/18903 | | 0.001133 | | 0.021484 | 0.01625 | | IGFBP5/KRT17/KRT14/APCDD1 | | | 4 | |
| BP | GO:0003334 | keratinocyte development | | | | 2/75 | 13/18903 | | 0.001178 | | 0.021706 | 0.016418 | | KRT2/SFN | | | 2 | |
| BP | GO:0045916 | negative regulation of complement activation | | | | 2/75 | 13/18903 | | 0.001178 | | 0.021706 | 0.016418 | | A2M/VSIG4 | | | 2 | |
| BP | GO:0070486 | leukocyte aggregation | | | | 2/75 | 13/18903 | | 0.001178 | | 0.021706 | 0.016418 | | S100A9/S100A8 | | | 2 | |
| BP | GO:0061900 | glial cell activation | | | | 3/75 | 54/18903 | | 0.001287 | | 0.023494 | 0.017771 | | CLU/SPHK1/CCL3 | | | 3 | |
| BP | GO:0000302 | response to reactive oxygen species | | | | 5/75 | 204/18903 | | 0.001304 | | 0.023598 | 0.017849 | | APOD/TPM1/GSTP1/TXNIP/SPHK1 | | | 5 | |
| BP | GO:0002686 | negative regulation of leukocyte migration | | | | 3/75 | 55/18903 | | 0.001357 | | 0.023707 | 0.017932 | | APOD/CXCL12/MIF | | | 3 | |
| BP | GO:0043616 | keratinocyte proliferation | | | | 3/75 | 55/18903 | | 0.001357 | | 0.023707 | 0.017932 | | KRT2/EREG/SFN | | | 3 | |
| BP | GO:0040013 | negative regulation of locomotion | | | | 7/75 | 419/18903 | | 0.001358 | | 0.023707 | 0.017932 | | APOD/CXCL12/TPM1/SFRP2/IGFBP5/DCN/MIF | | | 7 | |
| BP | GO:0071674 | mononuclear cell migration | | | | 5/75 | 206/18903 | | 0.001362 | | 0.023707 | 0.017932 | | APOD/EPS8/CXCL12/S100A14/CCL3 | | | 5 | |
| BP | GO:0050930 | induction of positive chemotaxis | | | | 2/75 | 14/18903 | | 0.001371 | | 0.023707 | 0.017932 | | CXCL12/CXCL8 | | | 2 | |
| BP | GO:0043500 | muscle adaptation | | | | 4/75 | 122/18903 | | 0.00141 | | 0.024075 | 0.01821 | | IGF1/IGFBP5/GSN/PI16 | | | 4 | |
| BP | GO:0001836 | release of cytochrome c from mitochondria | | | | 3/75 | 56/18903 | | 0.00143 | | 0.024075 | 0.01821 | | IGF1/CLU/SFN | | | 3 | |
| BP | GO:0050832 | defense response to fungus | | | | 3/75 | 56/18903 | | 0.00143 | | 0.024075 | 0.01821 | | S100A9/DCD/S100A8 | | | 3 | |
| BP | GO:0030282 | bone mineralization | | | | 4/75 | 123/18903 | | 0.001453 | | 0.024075 | 0.01821 | | IGF1/MGP/CCL3/ASPN | | | 4 | |
| BP | GO:0071675 | regulation of mononuclear cell migration | | | | 4/75 | 123/18903 | | 0.001453 | | 0.024075 | 0.01821 | | APOD/CXCL12/S100A14/CCL3 | | | 4 | |
| BP | GO:0019730 | antimicrobial humoral response | | | | 4/75 | 125/18903 | | 0.001542 | | 0.02465 | 0.018645 | | S100A9/CXCL8/CXCL2/CXCL14 | | | 4 | |
| BP | GO:0043280 | positive regulation of cysteine-type endopeptidase activity involved in apoptotic process | | | | 4/75 | 125/18903 | | 0.001542 | | 0.02465 | 0.018645 | | S100A9/S100A8/CTSH/GSN | | | 4 | |
| BP | GO:0070372 | regulation of ERK1 and ERK2 cascade | | | | 6/75 | 315/18903 | | 0.001567 | | 0.02465 | 0.018645 | | IGF1/GSTP1/MIF/TIMP3/CCL3/GPNMB | | | 6 | |
| BP | GO:0003214 | cardiac left ventricle morphogenesis | | | | 2/75 | 15/18903 | | 0.001577 | | 0.02465 | 0.018645 | | SFRP2/CPE | | | 2 | |
| BP | GO:0009886 | post-embryonic animal morphogenesis | | | | 2/75 | 15/18903 | | 0.001577 | | 0.02465 | 0.018645 | | FBN1/EFEMP1 | | | 2 | |
| BP | GO:0070207 | protein homotrimerization | | | | 2/75 | 15/18903 | | 0.001577 | | 0.02465 | 0.018645 | | MIF/STEAP4 | | | 2 | |
| BP | GO:0090280 | positive regulation of calcium ion import | | | | 2/75 | 15/18903 | | 0.001577 | | 0.02465 | 0.018645 | | CXCL12/CCL3 | | | 2 | |
| BP | GO:0003231 | cardiac ventricle development | | | | 4/75 | 126/18903 | | 0.001587 | | 0.02465 | 0.018645 | | TPM1/SFRP2/CPE/LMO4 | | | 4 | |
| BP | GO:0051785 | positive regulation of nuclear division | | | | 3/75 | 59/18903 | | 0.001663 | | 0.025615 | 0.019375 | | IGF1/EREG/SPHK1 | | | 3 | |
| BP | GO:0032612 | interleukin-1 production | | | | 4/75 | 130/18903 | | 0.00178 | | 0.026861 | 0.020317 | | IGF1/GSTP1/SPHK1/CCL3 | | | 4 | |
| BP | GO:0032652 | regulation of interleukin-1 production | | | | 4/75 | 130/18903 | | 0.00178 | | 0.026861 | 0.020317 | | IGF1/GSTP1/SPHK1/CCL3 | | | 4 | |
| BP | GO:0043508 | negative regulation of JUN kinase activity | | | | 2/75 | 16/18903 | | 0.001798 | | 0.026861 | 0.020317 | | SFRP2/GSTP1 | | | 2 | |
| BP | GO:0061684 | chaperone-mediated autophagy | | | | 2/75 | 16/18903 | | 0.001798 | | 0.026861 | 0.020317 | | SYNPO2/CLU | | | 2 | |
| BP | GO:0048568 | embryonic organ development | | | | 7/75 | 449/18903 | | 0.002012 | | 0.029198 | 0.022085 | | FBN1/JUNB/PRRX1/CXCL8/A2M/MFAP5/EFEMP1 | | | 7 | |
| BP | GO:0002921 | negative regulation of humoral immune response | | | | 2/75 | 17/18903 | | 0.002033 | | 0.029198 | 0.022085 | | A2M/VSIG4 | | | 2 | |
| BP | GO:0017014 | protein nitrosylation | | | | 2/75 | 17/18903 | | 0.002033 | | 0.029198 | 0.022085 | | S100A9/S100A8 | | | 2 | |
| BP | GO:0018119 | peptidyl-cysteine S-nitrosylation | | | | 2/75 | 17/18903 | | 0.002033 | | 0.029198 | 0.022085 | | S100A9/S100A8 | | | 2 | |
| BP | GO:0070206 | protein trimerization | | | | 2/75 | 17/18903 | | 0.002033 | | 0.029198 | 0.022085 | | MIF/STEAP4 | | | 2 | |
| BP | GO:2001235 | positive regulation of apoptotic signaling pathway | | | | 4/75 | 135/18903 | | 0.002043 | | 0.029198 | 0.022085 | | S100A9/S100A8/TIMP3/CTSH | | | 4 | |
| BP | GO:0010001 | glial cell differentiation | | | | 5/75 | 227/18903 | | 0.002085 | | 0.029574 | 0.022369 | | S100A9/S100A8/CLU/VIM/PHGDH | | | 5 | |
| BP | GO:0030111 | regulation of Wnt signaling pathway | | | | 6/75 | 336/18903 | | 0.002169 | | 0.030553 | 0.023109 | | ZEB2/SFRP2/IGFBP6/IGFBP4/APCDD1/SFRP4 | | | 6 | |
| BP | GO:0016055 | Wnt signaling pathway | | | | 7/75 | 456/18903 | | 0.002195 | | 0.030649 | 0.023182 | | ZEB2/SFRP2/IGFBP6/IGFBP4/APCDD1/SFRP4/CPE | | | 7 | |
| BP | GO:0050920 | regulation of chemotaxis | | | | 5/75 | 230/18903 | | 0.002207 | | 0.030649 | 0.023182 | | CXCL12/S100A14/MIF/CXCL8/CCL3 | | | 5 | |
| BP | GO:0198738 | cell-cell signaling by wnt | | | | 7/75 | 458/18903 | | 0.002249 | | 0.03102 | 0.023463 | | ZEB2/SFRP2/IGFBP6/IGFBP4/APCDD1/SFRP4/CPE | | | 7 | |
| BP | GO:0048569 | post-embryonic animal organ development | | | | 2/75 | 18/18903 | | 0.002281 | | 0.031203 | 0.023602 | | FBN1/EFEMP1 | | | 2 | |
| BP | GO:0045682 | regulation of epidermis development | | | | 3/75 | 66/18903 | | 0.002294 | | 0.031203 | 0.023602 | | KRT2/SFN/SFRP4 | | | 3 | |
| BP | GO:0071356 | cellular response to tumor necrosis factor | | | | 5/75 | 234/18903 | | 0.002378 | | 0.031913 | 0.024139 | | GSTP1/CTSK/CXCL8/SPHK1/CCL3 | | | 5 | |
| BP | GO:0090090 | negative regulation of canonical Wnt signaling pathway | | | | 4/75 | 141/18903 | | 0.002393 | | 0.031913 | 0.024139 | | SFRP2/IGFBP6/IGFBP4/SFRP4 | | | 4 | |
| BP | GO:0009620 | response to fungus | | | | 3/75 | 67/18903 | | 0.002395 | | 0.031913 | 0.024139 | | S100A9/DCD/S100A8 | | | 3 | |
| BP | GO:2001056 | positive regulation of cysteine-type endopeptidase activity | | | | 4/75 | 143/18903 | | 0.002518 | | 0.033204 | 0.025115 | | S100A9/S100A8/CTSH/GSN | | | 4 | |
| BP | GO:0002523 | leukocyte migration involved in inflammatory response | | | | 2/75 | 19/18903 | | 0.002542 | | 0.033204 | 0.025115 | | S100A9/S100A8 | | | 2 | |
| BP | GO:0002544 | chronic inflammatory response | | | | 2/75 | 19/18903 | | 0.002542 | | 0.033204 | 0.025115 | | S100A9/S100A8 | | | 2 | |
| BP | GO:0050921 | positive regulation of chemotaxis | | | | 4/75 | 144/18903 | | 0.002583 | | 0.033505 | 0.025343 | | CXCL12/S100A14/CXCL8/CCL3 | | | 4 | |
| BP | GO:2000401 | regulation of lymphocyte migration | | | | 3/75 | 69/18903 | | 0.002605 | | 0.033556 | 0.025381 | | APOD/CXCL12/CCL3 | | | 3 | |
| BP | GO:0045765 | regulation of angiogenesis | | | | 6/75 | 349/18903 | | 0.002621 | | 0.033556 | 0.025381 | | SFRP2/DCN/CXCL8/SPHK1/CTSH/GPNMB | | | 6 | |
| BP | GO:0031333 | negative regulation of protein-containing complex assembly | | | | 4/75 | 146/18903 | | 0.002714 | | 0.034535 | 0.026121 | | EPS8/CLU/GSN/LMO4 | | | 4 | |
| BP | GO:1903978 | regulation of microglial cell activation | | | | 2/75 | 20/18903 | | 0.002818 | | 0.035142 | 0.026581 | | SPHK1/CCL3 | | | 2 | |
| BP | GO:0002548 | monocyte chemotaxis | | | | 3/75 | 71/18903 | | 0.002825 | | 0.035142 | 0.026581 | | CXCL12/S100A14/CCL3 | | | 3 | |
| BP | GO:0003208 | cardiac ventricle morphogenesis | | | | 3/75 | 71/18903 | | 0.002825 | | 0.035142 | 0.026581 | | TPM1/SFRP2/CPE | | | 3 | |
| BP | GO:0002687 | positive regulation of leukocyte migration | | | | 4/75 | 148/18903 | | 0.002851 | | 0.035142 | 0.026581 | | CXCL12/S100A14/CXCL8/CCL3 | | | 4 | |
| BP | GO:1901342 | regulation of vasculature development | | | | 6/75 | 355/18903 | | 0.002851 | | 0.035142 | 0.026581 | | SFRP2/DCN/CXCL8/SPHK1/CTSH/GPNMB | | | 6 | |
| BP | GO:0014743 | regulation of muscle hypertrophy | | | | 3/75 | 72/18903 | | 0.00294 | | 0.036009 | 0.027237 | | IGF1/IGFBP5/PI16 | | | 3 | |
| BP | GO:0033002 | muscle cell proliferation | | | | 5/75 | 247/18903 | | 0.003002 | | 0.036034 | 0.027255 | | APOD/IGF1/TPM1/IGFBP5/EREG | | | 5 | |
| BP | GO:0071677 | positive regulation of mononuclear cell migration | | | | 3/75 | 73/18903 | | 0.003057 | | 0.036034 | 0.027255 | | CXCL12/S100A14/CCL3 | | | 3 | |
| BP | GO:0072678 | T cell migration | | | | 3/75 | 73/18903 | | 0.003057 | | 0.036034 | 0.027255 | | APOD/CXCL12/CCL3 | | | 3 | |
| BP | GO:0045821 | positive regulation of glycolytic process | | | | 2/75 | 21/18903 | | 0.003106 | | 0.036034 | 0.027255 | | ZBTB20/IGF1 | | | 2 | |
| BP | GO:0061050 | regulation of cell growth involved in cardiac muscle cell development | | | | 2/75 | 21/18903 | | 0.003106 | | 0.036034 | 0.027255 | | IGF1/PI16 | | | 2 | |
| BP | GO:0071605 | monocyte chemotactic protein-1 production | | | | 2/75 | 21/18903 | | 0.003106 | | 0.036034 | 0.027255 | | APOD/GSTP1 | | | 2 | |
| BP | GO:0071637 | regulation of monocyte chemotactic protein-1 production | | | | 2/75 | 21/18903 | | 0.003106 | | 0.036034 | 0.027255 | | APOD/GSTP1 | | | 2 | |
| BP | GO:0090026 | positive regulation of monocyte chemotaxis | | | | 2/75 | 21/18903 | | 0.003106 | | 0.036034 | 0.027255 | | CXCL12/S100A14 | | | 2 | |
| BP | GO:0090201 | negative regulation of release of cytochrome c from mitochondria | | | | 2/75 | 21/18903 | | 0.003106 | | 0.036034 | 0.027255 | | IGF1/CLU | | | 2 | |
| BP | GO:0048662 | negative regulation of smooth muscle cell proliferation | | | | 3/75 | 74/18903 | | 0.003177 | | 0.036642 | 0.027716 | | APOD/TPM1/IGFBP5 | | | 3 | |
| BP | GO:0051092 | positive regulation of NF-kappaB transcription factor activity | | | | 4/75 | 154/18903 | | 0.003288 | | 0.037701 | 0.028516 | | S100A9/S100A8/CLU/SPHK1 | | | 4 | |
| BP | GO:2001236 | regulation of extrinsic apoptotic signaling pathway | | | | 4/75 | 155/18903 | | 0.003365 | | 0.038188 | 0.028885 | | IGF1/SFRP2/GSTP1/TIMP3 | | | 4 | |
| BP | GO:0034612 | response to tumor necrosis factor | | | | 5/75 | 254/18903 | | 0.003383 | | 0.038188 | 0.028885 | | GSTP1/CTSK/CXCL8/SPHK1/CCL3 | | | 5 | |
| BP | GO:0051767 | nitric-oxide synthase biosynthetic process | | | | 2/75 | 22/18903 | | 0.003408 | | 0.038188 | 0.028885 | | GSTP1/NAMPT | | | 2 | |
| BP | GO:0051769 | regulation of nitric-oxide synthase biosynthetic process | | | | 2/75 | 22/18903 | | 0.003408 | | 0.038188 | 0.028885 | | GSTP1/NAMPT | | | 2 | |
| BP | GO:0090257 | regulation of muscle system process | | | | 5/75 | 256/18903 | | 0.003498 | | 0.038569 | 0.029173 | | IGF1/TPM1/IGFBP5/SPHK1/PI16 | | | 5 | |
| BP | GO:0019221 | cytokine-mediated signaling pathway | | | | 7/75 | 496/18903 | | 0.003501 | | 0.038569 | 0.029173 | | CXCL12/GSTP1/EREG/CXCL8/SPHK1/CXCL2/CCL3 | | | 7 | |
| BP | GO:0043410 | positive regulation of MAPK cascade | | | | 7/75 | 496/18903 | | 0.003501 | | 0.038569 | 0.029173 | | IGF1/MIF/SPHK1/IGFBP6/IGFBP4/CCL3/GPNMB | | | 7 | |
| BP | GO:0006919 | activation of cysteine-type endopeptidase activity involved in apoptotic process | | | | 3/75 | 77/18903 | | 0.003555 | | 0.038734 | 0.029298 | | S100A9/S100A8/CTSH | | | 3 | |
| BP | GO:0032720 | negative regulation of tumor necrosis factor production | | | | 3/75 | 77/18903 | | 0.003555 | | 0.038734 | 0.029298 | | IGF1/GSTP1/GPNMB | | | 3 | |
| BP | GO:0060828 | regulation of canonical Wnt signaling pathway | | | | 5/75 | 260/18903 | | 0.003736 | | 0.040484 | 0.030621 | | ZEB2/SFRP2/IGFBP6/IGFBP4/SFRP4 | | | 5 | |
| BP | GO:1903556 | negative regulation of tumor necrosis factor superfamily cytokine production | | | | 3/75 | 79/18903 | | 0.003822 | | 0.041182 | 0.03115 | | IGF1/GSTP1/GPNMB | | | 3 | |
| BP | GO:0010466 | negative regulation of peptidase activity | | | | 5/75 | 263/18903 | | 0.003923 | | 0.042041 | 0.031799 | | SFRP2/SFN/A2M/TIMP3/PI16 | | | 5 | |
| BP | GO:1902903 | regulation of supramolecular fiber organization | | | | 6/75 | 384/18903 | | 0.004188 | | 0.04464 | 0.033765 | | SYNPO2/EPS8/CXCL12/TPM1/CLU/GSN | | | 6 | |
| BP | GO:0048708 | astrocyte differentiation | | | | 3/75 | 82/18903 | | 0.004244 | | 0.044993 | 0.034032 | | S100A9/S100A8/VIM | | | 3 | |
| BP | GO:0070663 | regulation of leukocyte proliferation | | | | 5/75 | 269/18903 | | 0.004315 | | 0.04535 | 0.034302 | | IGF1/GSTP1/MIF/VSIG4/GPNMB | | | 5 | |
| BP | GO:0003205 | cardiac chamber development | | | | 4/75 | 167/18903 | | 0.004389 | | 0.04535 | 0.034302 | | TPM1/SFRP2/CPE/LMO4 | | | 4 | |
| BP | GO:0030509 | BMP signaling pathway | | | | 4/75 | 167/18903 | | 0.004389 | | 0.04535 | 0.034302 | | FBN1/SFRP2/FSTL1/SFRP4 | | | 4 | |
| BP | GO:0042659 | regulation of cell fate specification | | | | 2/75 | 25/18903 | | 0.004392 | | 0.04535 | 0.034302 | | SFRP2/LMO4 | | | 2 | |
| BP | GO:0050927 | positive regulation of positive chemotaxis | | | | 2/75 | 25/18903 | | 0.004392 | | 0.04535 | 0.034302 | | CXCL12/CXCL8 | | | 2 | |
| BP | GO:0031424 | keratinization | | | | 3/75 | 84/18903 | | 0.00454 | | 0.046632 | 0.035271 | | KRT2/KRT17/SFN | | | 3 | |
| BP | GO:0050926 | regulation of positive chemotaxis | | | | 2/75 | 26/18903 | | 0.004746 | | 0.047511 | 0.035936 | | CXCL12/CXCL8 | | | 2 | |
| BP | GO:0051016 | barbed-end actin filament capping | | | | 2/75 | 26/18903 | | 0.004746 | | 0.047511 | 0.035936 | | EPS8/GSN | | | 2 | |
| BP | GO:0051238 | sequestering of metal ion | | | | 2/75 | 26/18903 | | 0.004746 | | 0.047511 | 0.035936 | | S100A9/S100A8 | | | 2 | |
| BP | GO:1905048 | regulation of metallopeptidase activity | | | | 2/75 | 26/18903 | | 0.004746 | | 0.047511 | 0.035936 | | CLDN4/TIMP3 | | | 2 | |
| BP | GO:2000050 | regulation of non-canonical Wnt signaling pathway | | | | 2/75 | 26/18903 | | 0.004746 | | 0.047511 | 0.035936 | | SFRP2/SFRP4 | | | 2 | |
| BP | GO:0110053 | regulation of actin filament organization | | | | 5/75 | 278/18903 | | 0.004955 | | 0.049353 | 0.03733 | | SYNPO2/EPS8/CXCL12/TPM1/GSN | | | 5 | |
| BP | GO:0014910 | regulation of smooth muscle cell migration | | | | 3/75 | 87/18903 | | 0.005008 | | 0.049627 | 0.037537 | | IGF1/TPM1/IGFBP5 | | | 3 | |
| BP | GO:0031214 | biomineral tissue development | | | | 4/75 | 174/18903 | | 0.005073 | | 0.049668 | 0.037568 | | IGF1/MGP/CCL3/ASPN | | | 4 | |
| BP | GO:0032682 | negative regulation of chemokine production | | | | 2/75 | 27/18903 | | 0.005113 | | 0.049668 | 0.037568 | | APOD/GSTP1 | | | 2 | |
| BP | GO:0044342 | type B pancreatic cell proliferation | | | | 2/75 | 27/18903 | | 0.005113 | | 0.049668 | 0.037568 | | IGFBP5/IGFBP4 | | | 2 | |
| BP | GO:0061436 | establishment of skin barrier | | | | 2/75 | 27/18903 | | 0.005113 | | 0.049668 | 0.037568 | | CLDN4/SFN | | | 2 | |
| CC | GO:0062023 | collagen-containing extracellular matrix | | | | 19/79 | 433/19869 | | 4.82E-15 | | 7.42E-13 | 6.34E-13 | | S100A9/S100A8/MGP/CXCL12/FBN1/CCDC80/SFRP2/DCN/DPT/CLU/A2M/VCAN/BGN/TIMP3/CTSH/MFAP5/EFEMP1/ASPN/IGFBP7 | | | 19 | |
| CC | GO:0034774 | secretory granule lumen | | | | 12/79 | 322/19869 | | 5.19E-09 | | 2.37E-07 | 2.03E-07 | | S100A9/S100A8/IGF1/GSTP1/MIF/CLU/CFD/A2M/TIMP3/HSPA6/CTSH/GSN | | | 12 | |
| CC | GO:0060205 | cytoplasmic vesicle lumen | | | | 12/79 | 325/19869 | | 5.76E-09 | | 2.37E-07 | 2.03E-07 | | S100A9/S100A8/IGF1/GSTP1/MIF/CLU/CFD/A2M/TIMP3/HSPA6/CTSH/GSN | | | 12 | |
| CC | GO:0031983 | vesicle lumen | | | | 12/79 | 327/19869 | | 6.17E-09 | | 2.37E-07 | 2.03E-07 | | S100A9/S100A8/IGF1/GSTP1/MIF/CLU/CFD/A2M/TIMP3/HSPA6/CTSH/GSN | | | 12 | |
| CC | GO:1904813 | ficolin-1-rich granule lumen | | | | 6/79 | 124/19869 | | 1.00E-05 | | 0.000309 | 0.000264 | | GSTP1/MIF/CFD/HSPA6/CTSH/GSN | | | 6 | |
| CC | GO:0101002 | ficolin-1-rich granule | | | | 6/79 | 185/19869 | | 9.51E-05 | | 0.00244 | 0.002085 | | GSTP1/MIF/CFD/HSPA6/CTSH/GSN | | | 6 | |
| CC | GO:0031093 | platelet alpha granule lumen | | | | 4/79 | 67/19869 | | 0.000147 | | 0.003227 | 0.002757 | | IGF1/CLU/CFD/A2M | | | 4 | |
| CC | GO:0005788 | endoplasmic reticulum lumen | | | | 7/79 | 312/19869 | | 0.000243 | | 0.00467 | 0.00399 | | FBN1/IGFBP5/FSTL1/CLU/VCAN/IGFBP4/IGFBP7 | | | 7 | |
| CC | GO:0072562 | blood microparticle | | | | 5/79 | 145/19869 | | 0.000282 | | 0.004827 | 0.004124 | | CFH/CLU/A2M/HSPA6/GSN | | | 5 | |
| CC | GO:0031091 | platelet alpha granule | | | | 4/79 | 91/19869 | | 0.000476 | | 0.007329 | 0.006262 | | IGF1/CLU/CFD/A2M | | | 4 | |
| CC | GO:0043202 | lysosomal lumen | | | | 4/79 | 98/19869 | | 0.00063 | | 0.008818 | 0.007534 | | DCN/CTSK/VCAN/BGN | | | 4 | |
| CC | GO:0001527 | microfibril | | | | 2/79 | 13/19869 | | 0.001183 | | 0.015187 | 0.012976 | | FBN1/MFAP5 | | | 2 | |
| CC | GO:0045111 | intermediate filament cytoskeleton | | | | 5/79 | 253/19869 | | 0.003372 | | 0.039942 | 0.034127 | | S100A8/KRT2/KRT17/KRT14/VIM | | | 5 | |
| MF | GO:0005201 | extracellular matrix structural constituent | | | | 10/77 | 173/18432 | | 2.61E-09 | | 6.05E-07 | 4.75E-07 | | MGP/FBN1/DCN/DPT/VCAN/BGN/MFAP5/EFEMP1/ASPN/IGFBP7 | | | 10 | |
| MF | GO:0048018 | receptor ligand activity | | | | 13/77 | 491/18432 | | 1.13E-07 | | 1.01E-05 | 7.92E-06 | | IGF1/CXCL12/FBN1/SFRP2/EREG/MIF/CXCL8/CXCL2/CXCL14/NAMPT/EFEMP1/CCL3/GPNMB | | | 13 | |
| MF | GO:0030546 | signaling receptor activator activity | | | | 13/77 | 498/18432 | | 1.33E-07 | | 1.01E-05 | 7.92E-06 | | IGF1/CXCL12/FBN1/SFRP2/EREG/MIF/CXCL8/CXCL2/CXCL14/NAMPT/EFEMP1/CCL3/GPNMB | | | 13 | |
| MF | GO:0001968 | fibronectin binding | | | | 5/77 | 31/18432 | | 1.74E-07 | | 1.01E-05 | 7.92E-06 | | CCDC80/SFRP2/IGFBP5/CTSK/IGFBP6 | | | 5 | |
| MF | GO:0042379 | chemokine receptor binding | | | | 6/77 | 71/18432 | | 5.03E-07 | | 2.34E-05 | 1.83E-05 | | CXCL12/S100A14/CXCL8/CXCL2/CXCL14/CCL3 | | | 6 | |
| MF | GO:0005539 | glycosaminoglycan binding | | | | 9/77 | 237/18432 | | 6.23E-07 | | 2.41E-05 | 1.89E-05 | | CFH/FBN1/CCDC80/DCN/FSTL1/CXCL8/VCAN/BGN/GPNMB | | | 9 | |
| MF | GO:0005520 | insulin-like growth factor binding | | | | 4/77 | 19/18432 | | 1.04E-06 | | 3.45E-05 | 2.71E-05 | | IGFBP5/IGFBP6/IGFBP4/IGFBP7 | | | 4 | |
| MF | GO:0008009 | chemokine activity | | | | 5/77 | 49/18432 | | 1.84E-06 | | 5.01E-05 | 3.94E-05 | | CXCL12/CXCL8/CXCL2/CXCL14/CCL3 | | | 5 | |
| MF | GO:0030021 | extracellular matrix structural constituent conferring compression resistance | | | | 4/77 | 22/18432 | | 1.94E-06 | | 5.01E-05 | 3.94E-05 | | DCN/VCAN/BGN/ASPN | | | 4 | |
| MF | GO:1901681 | sulfur compound binding | | | | 8/77 | 270/18432 | | 1.68E-05 | | 0.000389 | 0.000306 | | CFH/FBN1/CCDC80/ACOT7/GSTP1/FSTL1/CXCL8/GPNMB | | | 8 | |
| MF | GO:0031994 | insulin-like growth factor I binding | | | | 3/77 | 13/18432 | | 1.95E-05 | | 0.00041 | 0.000322 | | IGFBP5/IGFBP6/IGFBP4 | | | 3 | |
| MF | GO:0048306 | calcium-dependent protein binding | | | | 5/77 | 81/18432 | | 2.23E-05 | | 0.000431 | 0.000339 | | S100A9/S100A8/S100A14/S100A16/A2M | | | 5 | |
| MF | GO:0045236 | CXCR chemokine receptor binding | | | | 3/77 | 18/18432 | | 5.47E-05 | | 0.000976 | 0.000766 | | CXCL12/CXCL8/CXCL2 | | | 3 | |
| MF | GO:0005125 | cytokine activity | | | | 7/77 | 237/18432 | | 5.95E-05 | | 0.000986 | 0.000774 | | CXCL12/MIF/CXCL8/CXCL2/CXCL14/NAMPT/CCL3 | | | 7 | |
| MF | GO:0008201 | heparin binding | | | | 6/77 | 171/18432 | | 8.03E-05 | | 0.001242 | 0.000975 | | CFH/FBN1/CCDC80/FSTL1/CXCL8/GPNMB | | | 6 | |
| MF | GO:0005126 | cytokine receptor binding | | | | 7/77 | 273/18432 | | 0.000144 | | 0.002085 | 0.001637 | | CXCL12/S100A14/MIF/CXCL8/CXCL2/CXCL14/CCL3 | | | 7 | |
| MF | GO:0019838 | growth factor binding | | | | 5/77 | 132/18432 | | 0.000228 | | 0.003115 | 0.002445 | | IGFBP5/IGFBP6/A2M/IGFBP4/IGFBP7 | | | 5 | |
| MF | GO:0017147 | Wnt-protein binding | | | | 3/77 | 30/18432 | | 0.000262 | | 0.003382 | 0.002655 | | SFRP2/APCDD1/SFRP4 | | | 3 | |
| MF | GO:0042056 | chemoattractant activity | | | | 3/77 | 36/18432 | | 0.000453 | | 0.005257 | 0.004127 | | MIF/CCL3/GPNMB | | | 3 | |
| MF | GO:0043394 | proteoglycan binding | | | | 3/77 | 36/18432 | | 0.000453 | | 0.005257 | 0.004127 | | CFH/CTSK/GPNMB | | | 3 | |
| MF | GO:0005178 | integrin binding | | | | 5/77 | 156/18432 | | 0.000493 | | 0.005443 | 0.004272 | | IGF1/CXCL12/FBN1/SFRP2/GPNMB | | | 5 | |
| MF | GO:0050786 | RAGE receptor binding | | | | 2/77 | 10/18432 | | 0.000759 | | 0.007999 | 0.006279 | | S100A9/S100A8 | | | 2 | |
| MF | GO:0001851 | complement component C3b binding | | | | 2/77 | 11/18432 | | 0.000925 | | 0.009326 | 0.00732 | | CFH/VSIG4 | | | 2 | |
| MF | GO:0005200 | structural constituent of cytoskeleton | | | | 4/77 | 107/18432 | | 0.001049 | | 0.010036 | 0.007878 | | KRT2/TPM1/KRT14/VIM | | | 4 | |
| MF | GO:0035325 | Toll-like receptor binding | | | | 2/77 | 12/18432 | | 0.001106 | | 0.010036 | 0.007878 | | S100A9/S100A8 | | | 2 | |
| MF | GO:0005504 | fatty acid binding | | | | 3/77 | 49/18432 | | 0.001125 | | 0.010036 | 0.007878 | | S100A9/S100A8/GSTP1 | | | 3 | |
| MF | GO:0019215 | intermediate filament binding | | | | 2/77 | 13/18432 | | 0.001304 | | 0.01091 | 0.008564 | | KRT14/VIM | | | 2 | |
| MF | GO:0001664 | G protein-coupled receptor binding | | | | 6/77 | 289/18432 | | 0.001317 | | 0.01091 | 0.008564 | | CXCL12/S100A14/CXCL8/CXCL2/CXCL14/CCL3 | | | 6 | |
| MF | GO:0036041 | long-chain fatty acid binding | | | | 2/77 | 15/18432 | | 0.001746 | | 0.013969 | 0.010964 | | S100A9/S100A8 | | | 2 | |
| MF | GO:0061134 | peptidase regulator activity | | | | 5/77 | 232/18432 | | 0.002865 | | 0.022156 | 0.017391 | | SFRP2/A2M/TIMP3/CTSH/PI16 | | | 5 | |
| MF | GO:0005518 | collagen binding | | | | 3/77 | 69/18432 | | 0.003013 | | 0.022549 | 0.0177 | | DCN/CTSK/ASPN | | | 3 | |
| MF | GO:0001846 | opsonin binding | | | | 2/77 | 21/18432 | | 0.003436 | | 0.024911 | 0.019553 | | CFH/VSIG4 | | | 2 | |
| MF | GO:0004602 | glutathione peroxidase activity | | | | 2/77 | 22/18432 | | 0.003769 | | 0.0265 | 0.020801 | | GSTP1/MGST1 | | | 2 | |
| MF | GO:0008083 | growth factor activity | | | | 4/77 | 162/18432 | | 0.00473 | | 0.03138 | 0.024632 | | IGF1/CXCL12/EREG/EFEMP1 | | | 4 | |
| MF | GO:0033293 | monocarboxylic acid binding | | | | 3/77 | 81/18432 | | 0.004734 | | 0.03138 | 0.024632 | | S100A9/S100A8/GSTP1 | | | 3 | |
| MF | GO:0001848 | complement binding | | | | 2/77 | 26/18432 | | 0.005246 | | 0.032895 | 0.025821 | | CFH/VSIG4 | | | 2 | |
| MF | GO:0004364 | glutathione transferase activity | | | | 2/77 | 26/18432 | | 0.005246 | | 0.032895 | 0.025821 | | GSTP1/MGST1 | | | 2 | |
| MF | GO:0016209 | antioxidant activity | | | | 3/77 | 85/18432 | | 0.005416 | | 0.033063 | 0.025953 | | S100A9/GSTP1/MGST1 | | | 3 | |
| MF | GO:0051787 | misfolded protein binding | | | | 2/77 | 29/18432 | | 0.006501 | | 0.038672 | 0.030355 | | CLU/HSPA6 | | | 2 | |
| MF | GO:0005154 | epidermal growth factor receptor binding | | | | 2/77 | 33/18432 | | 0.008364 | | 0.048511 | 0.038078 | | EREG/EFEMP1 | | | 2 | |

**Table S3** KEGG enrichment analysis

| ID | Description | GeneRatio | BgRatio | pvalue | p.adjust | qvalue | geneID | Count |
| --- | --- | --- | --- | --- | --- | --- | --- | --- |
| hsa04610 | Complement and coagulation cascades | 4/27 | 86/8386 | 0.000151 | 0.000151 | 0.012091 | CFH/CFD/CLU/A2M | 4 |
| hsa05323 | Rheumatoid arthritis | 3/27 | 93/8386 | 0.003185 | 0.003185 | 0.062556 | CXCL12/CTSK/CXCL8 | 3 |
| hsa04657 | IL-17 signaling pathway | 3/27 | 94/8386 | 0.003283 | 0.003283 | 0.062556 | S100A8/S100A9/CXCL8 | 3 |
| hsa05150 | Staphylococcus aureus infection | 3/27 | 96/8386 | 0.003484 | 0.003484 | 0.062556 | CFH/CFD/KRT17 | 3 |
| hsa04061 | Viral protein interaction with cytokine and cytokine receptor | 3/27 | 100/8386 | 0.00391 | 0.00391 | 0.062556 | CXCL12/CXCL14/CXCL8 | 3 |
| hsa04960 | Aldosterone-regulated sodium reabsorption | 2/27 | 37/8386 | 0.006203 | 0.006203 | 0.082704 | SFN/IGF1 | 2 |
| hsa04310 | Wnt signaling pathway | 3/27 | 170/8386 | 0.016752 | 0.016752 | 0.191454 | SFRP4/SFRP2/APCDD1 | 3 |
| hsa04115 | p53 signaling pathway | 2/27 | 73/8386 | 0.022798 | 0.022798 | 0.205136 | SFN/IGF1 | 2 |
| hsa04062 | Chemokine signaling pathway | 3/27 | 192/8386 | 0.023078 | 0.023078 | 0.205136 | CXCL12/CXCL14/CXCL8 | 3 |
| hsa05205 | Proteoglycans in cancer | 3/27 | 205/8386 | 0.027352 | 0.027352 | 0.218818 | DCN/LUM/IGF1 | 3 |
| hsa04350 | TGF-beta signaling pathway | 2/27 | 98/8386 | 0.039259 | 0.039259 | 0.269065 | FBN1/DCN | 2 |
| hsa04064 | NF-kappa B signaling pathway | 2/27 | 104/8386 | 0.043723 | 0.043723 | 0.269065 | CXCL12/CXCL8 | 2 |
| hsa04620 | Toll-like receptor signaling pathway | 2/27 | 104/8386 | 0.043723 | 0.043723 | 0.269065 | CTSK/CXCL8 | 2 |

**Table S4** MiRNAs-SNP network

| **mRNA** | **Mature miRNA** | **SNP ID** | **Position** | **Ref/Alt** | **Ref freq./Alt freq.** | **Gain** | **Loss** |
| --- | --- | --- | --- | --- | --- | --- | --- |
| IGF1 | [hsa-miR-1-3p](http://bioinfo.life.hust.edu.cn/miRNASNP/#!/mirna?mirna_id=hsa-miR-1-3p&one='1') | [rs1395109253](http://bioinfo.life.hust.edu.cn/miRNASNP/#!/snp?snp_id=rs1395109253&location=Seed&one=1) | chr18:21829034 | C/A | 1.0/- | [1,460](http://bioinfo.life.hust.edu.cn/miRNASNP/#!/snp?snp_id=rs1395109253&location=Seed&two='1') | [3,507](http://bioinfo.life.hust.edu.cn/miRNASNP/#!/snp?snp_id=rs1395109253&location=Seed&three='1') |
| IGF1 | [hsa-miR-1-3p](http://bioinfo.life.hust.edu.cn/miRNASNP/#!/mirna?mirna_id=hsa-miR-1-3p&one='1') | [rs1273198863](http://bioinfo.life.hust.edu.cn/miRNASNP/#!/snp?snp_id=rs1273198863&location=Seed&one=1) | chr18:21829035 | C/T | -/- | [3,353](http://bioinfo.life.hust.edu.cn/miRNASNP/#!/snp?snp_id=rs1273198863&location=Seed&two='1') | [2,169](http://bioinfo.life.hust.edu.cn/miRNASNP/#!/snp?snp_id=rs1273198863&location=Seed&three='1') |
| CXCL12 | [hsa-miR-141-3p](http://bioinfo.life.hust.edu.cn/miRNASNP/#!/mirna?mirna_id=hsa-miR-141-3p&one='1') | [rs1555150374](http://bioinfo.life.hust.edu.cn/miRNASNP/#!/snp?snp_id=rs1555150374&location=Seed&one=1) | chr12:6964158 | C/T | -/- | [2,331](http://bioinfo.life.hust.edu.cn/miRNASNP/#!/snp?snp_id=rs1555150374&location=Seed&two='1') | [983](http://bioinfo.life.hust.edu.cn/miRNASNP/#!/snp?snp_id=rs1555150374&location=Seed&three='1') |
| CXCL12 | [hsa-miR-141-3p](http://bioinfo.life.hust.edu.cn/miRNASNP/#!/mirna?mirna_id=hsa-miR-141-3p&one='1') | [rs1555150374](http://bioinfo.life.hust.edu.cn/miRNASNP/#!/snp?snp_id=rs1555150374&location=Seed&one=1) | chr12:6964158 | C/A | -/- | [3,438](http://bioinfo.life.hust.edu.cn/miRNASNP/#!/snp?snp_id=rs1555150374&location=Seed&two='1') | [462](http://bioinfo.life.hust.edu.cn/miRNASNP/#!/snp?snp_id=rs1555150374&location=Seed&three='1') |
| CXCL12 | [hsa-miR-141-3p](http://bioinfo.life.hust.edu.cn/miRNASNP/#!/mirna?mirna_id=hsa-miR-141-3p&one='1') | [rs782556563](http://bioinfo.life.hust.edu.cn/miRNASNP/#!/snp?snp_id=rs782556563&location=Seed&one=1) | chr12:6964159 | ACTGT/A | -/- | - | - |
| CXCL12 | [hsa-miR-144-3p](http://bioinfo.life.hust.edu.cn/miRNASNP/#!/mirna?mirna_id=hsa-miR-144-3p&one='1') | [rs1218721253](http://bioinfo.life.hust.edu.cn/miRNASNP/#!/snp?snp_id=rs1218721253&location=Seed&one=1) | chr17:28861562 | A/G | -/- | [3,619](http://bioinfo.life.hust.edu.cn/miRNASNP/#!/snp?snp_id=rs1218721253&location=Seed&two='1') | [2,048](http://bioinfo.life.hust.edu.cn/miRNASNP/#!/snp?snp_id=rs1218721253&location=Seed&three='1') |
| CXCL12 | [hsa-miR-144-3p](http://bioinfo.life.hust.edu.cn/miRNASNP/#!/mirna?mirna_id=hsa-miR-144-3p&one='1') | [rs917554219](http://bioinfo.life.hust.edu.cn/miRNASNP/#!/snp?snp_id=rs917554219&location=Seed&one=1) | chr17:28861563 | C/T | 1.0/- | [2,303](http://bioinfo.life.hust.edu.cn/miRNASNP/#!/snp?snp_id=rs917554219&location=Seed&two='1') | [2,425](http://bioinfo.life.hust.edu.cn/miRNASNP/#!/snp?snp_id=rs917554219&location=Seed&three='1') |
| CXCL12 | [hsa-miR-144-3p](http://bioinfo.life.hust.edu.cn/miRNASNP/#!/mirna?mirna_id=hsa-miR-144-3p&one='1') | [rs947719319](http://bioinfo.life.hust.edu.cn/miRNASNP/#!/snp?snp_id=rs947719319&location=Seed&one=1) | chr17:28861564 | T/G | -/- | [247](http://bioinfo.life.hust.edu.cn/miRNASNP/#!/snp?snp_id=rs947719319&location=Seed&two='1') | [5,582](http://bioinfo.life.hust.edu.cn/miRNASNP/#!/snp?snp_id=rs947719319&location=Seed&three='1') |
| CXCL12 | [hsa-miR-200a-3p](http://bioinfo.life.hust.edu.cn/miRNASNP/#!/mirna?mirna_id=hsa-miR-200a-3p&one='1') | [rs1377467792](http://bioinfo.life.hust.edu.cn/miRNASNP/#!/snp?snp_id=rs1377467792&location=Seed&one=1) | chr1:1167920 | A/G | 1.0/- | [426](http://bioinfo.life.hust.edu.cn/miRNASNP/#!/snp?snp_id=rs1377467792&location=Seed&two='1') | [5,725](http://bioinfo.life.hust.edu.cn/miRNASNP/#!/snp?snp_id=rs1377467792&location=Seed&three='1') |
| CXCL12 | [hsa-miR-200a-3p](http://bioinfo.life.hust.edu.cn/miRNASNP/#!/mirna?mirna_id=hsa-miR-200a-3p&one='1') | [rs749623182](http://bioinfo.life.hust.edu.cn/miRNASNP/#!/snp?snp_id=rs749623182&location=Seed&one=1) | chr1:1167920 | ACTGT/A | -/- | - | - |
| CXCL12 | [hsa-miR-200a-3p](http://bioinfo.life.hust.edu.cn/miRNASNP/#!/mirna?mirna_id=hsa-miR-200a-3p&one='1') | [rs1301032989](http://bioinfo.life.hust.edu.cn/miRNASNP/#!/snp?snp_id=rs1301032989&location=Seed&one=1) | chr1:1167923 | G/T | -/- | 0 | 0 |
| DCN | [hsa-miR-298](http://bioinfo.life.hust.edu.cn/miRNASNP/#!/mirna?mirna_id=hsa-miR-298&one='1') | [rs755174560](http://bioinfo.life.hust.edu.cn/miRNASNP/#!/snp?snp_id=rs755174560&location=Seed&one=1) | chr20:58818297 | T/C | -/- | [2,956](http://bioinfo.life.hust.edu.cn/miRNASNP/#!/snp?snp_id=rs755174560&location=Seed&two='1') | [2,718](http://bioinfo.life.hust.edu.cn/miRNASNP/#!/snp?snp_id=rs755174560&location=Seed&three='1') |
| DCN | [hsa-miR-298](http://bioinfo.life.hust.edu.cn/miRNASNP/#!/mirna?mirna_id=hsa-miR-298&one='1') | [rs1331296704](http://bioinfo.life.hust.edu.cn/miRNASNP/#!/snp?snp_id=rs1331296704&location=Seed&one=1) | chr20:58818298 | T/C | -/- | [2,946](http://bioinfo.life.hust.edu.cn/miRNASNP/#!/snp?snp_id=rs1331296704&location=Seed&two='1') | [2,803](http://bioinfo.life.hust.edu.cn/miRNASNP/#!/snp?snp_id=rs1331296704&location=Seed&three='1') |
| DCN | [hsa-miR-298](http://bioinfo.life.hust.edu.cn/miRNASNP/#!/mirna?mirna_id=hsa-miR-298&one='1') | [rs1235209161](http://bioinfo.life.hust.edu.cn/miRNASNP/#!/snp?snp_id=rs1235209161&location=Seed&one=1) | chr20:58818299 | C/T | -/- | [2,889](http://bioinfo.life.hust.edu.cn/miRNASNP/#!/snp?snp_id=rs1235209161&location=Seed&two='1') | [2,719](http://bioinfo.life.hust.edu.cn/miRNASNP/#!/snp?snp_id=rs1235209161&location=Seed&three='1') |
| CXCL12 | [hsa-miR-499a-3p](http://bioinfo.life.hust.edu.cn/miRNASNP/#!/mirna?mirna_id=hsa-miR-499a-3p&one='1') | [rs768246420](http://bioinfo.life.hust.edu.cn/miRNASNP/#!/snp?snp_id=rs768246420&location=Seed&one=1) | chr20:34990447 | C/T | -/- | [2,070](http://bioinfo.life.hust.edu.cn/miRNASNP/#!/snp?snp_id=rs768246420&location=Seed&two='1') | [3,153](http://bioinfo.life.hust.edu.cn/miRNASNP/#!/snp?snp_id=rs768246420&location=Seed&three='1') |
| CXCL12 | [hsa-miR-499a-3p](http://bioinfo.life.hust.edu.cn/miRNASNP/#!/mirna?mirna_id=hsa-miR-499a-3p&one='1') | [rs3746444](http://bioinfo.life.hust.edu.cn/miRNASNP/#!/snp?snp_id=rs3746444&location=Seed&one=1) | chr20:34990448 | A/G | 0.8171/0.1829 | [573](http://bioinfo.life.hust.edu.cn/miRNASNP/#!/snp?snp_id=rs3746444&location=Seed&two='1') | [5,392](http://bioinfo.life.hust.edu.cn/miRNASNP/#!/snp?snp_id=rs3746444&location=Seed&three='1') |
| CXCL12 | [hsa-miR-499a-3p](http://bioinfo.life.hust.edu.cn/miRNASNP/#!/mirna?mirna_id=hsa-miR-499a-3p&one='1') | [rs761417578](http://bioinfo.life.hust.edu.cn/miRNASNP/#!/snp?snp_id=rs761417578&location=Seed&one=1) | chr20:34990450 | C/A | -/- | [2,847](http://bioinfo.life.hust.edu.cn/miRNASNP/#!/snp?snp_id=rs761417578&location=Seed&two='1') | [2,496](http://bioinfo.life.hust.edu.cn/miRNASNP/#!/snp?snp_id=rs761417578&location=Seed&three='1') |
| CXCL12 | [hsa-miR-499a-3p](http://bioinfo.life.hust.edu.cn/miRNASNP/#!/mirna?mirna_id=hsa-miR-499a-3p&one='1') | [rs150018420](http://bioinfo.life.hust.edu.cn/miRNASNP/#!/snp?snp_id=rs150018420&location=Seed&one=1) | chr20:34990452 | C/T | 0.9995/0.0005 | 0 | 0 |
| DCN | [hsa-miR-541-3p](http://bioinfo.life.hust.edu.cn/miRNASNP/#!/mirna?mirna_id=hsa-miR-541-3p&one='1') | [rs1201957390](http://bioinfo.life.hust.edu.cn/miRNASNP/#!/snp?snp_id=rs1201957390&location=Seed&one=1) | chr14:101064549 | G/A | 1.0/- | [1,970](http://bioinfo.life.hust.edu.cn/miRNASNP/#!/snp?snp_id=rs1201957390&location=Seed&two='1') | [3,364](http://bioinfo.life.hust.edu.cn/miRNASNP/#!/snp?snp_id=rs1201957390&location=Seed&three='1') |
| IGF1 | [hsa-miR-5585-3p](http://bioinfo.life.hust.edu.cn/miRNASNP/#!/mirna?mirna_id=hsa-miR-5585-3p&one='1') | [rs1261632635](http://bioinfo.life.hust.edu.cn/miRNASNP/#!/snp?snp_id=rs1261632635&location=Seed&one=1) | chr1:32086988 | G/A | 1.0/- | [3,818](http://bioinfo.life.hust.edu.cn/miRNASNP/#!/snp?snp_id=rs1261632635&location=Seed&two='1') | [1,320](http://bioinfo.life.hust.edu.cn/miRNASNP/#!/snp?snp_id=rs1261632635&location=Seed&three='1') |
| IGF1 | [hsa-miR-5585-3p](http://bioinfo.life.hust.edu.cn/miRNASNP/#!/mirna?mirna_id=hsa-miR-5585-3p&one='1') | [rs141449846](http://bioinfo.life.hust.edu.cn/miRNASNP/#!/snp?snp_id=rs141449846&location=Seed&one=1) | chr1:32086991 | T/C | 0.9977/- | [2,889](http://bioinfo.life.hust.edu.cn/miRNASNP/#!/snp?snp_id=rs141449846&location=Seed&two='1') | [1,034](http://bioinfo.life.hust.edu.cn/miRNASNP/#!/snp?snp_id=rs141449846&location=Seed&three='1') |
| IGF1 | [hsa-miR-5585-3p](http://bioinfo.life.hust.edu.cn/miRNASNP/#!/mirna?mirna_id=hsa-miR-5585-3p&one='1') | [rs141449846](http://bioinfo.life.hust.edu.cn/miRNASNP/#!/snp?snp_id=rs141449846&location=Seed&one=1) | chr1:32086991 | T/G | 0.9977/0.0023 | [3,280](http://bioinfo.life.hust.edu.cn/miRNASNP/#!/snp?snp_id=rs141449846&location=Seed&two='1') | [681](http://bioinfo.life.hust.edu.cn/miRNASNP/#!/snp?snp_id=rs141449846&location=Seed&three='1') |
| DCN | [hsa-miR-875-3p](http://bioinfo.life.hust.edu.cn/miRNASNP/#!/mirna?mirna_id=hsa-miR-875-3p&one='1') | [rs1000558271](http://bioinfo.life.hust.edu.cn/miRNASNP/#!/snp?snp_id=rs1000558271&location=Seed&one=1) | chr8:99536812 | T/A | -/- | [1,355](http://bioinfo.life.hust.edu.cn/miRNASNP/#!/snp?snp_id=rs1000558271&location=Seed&two='1') | [4,743](http://bioinfo.life.hust.edu.cn/miRNASNP/#!/snp?snp_id=rs1000558271&location=Seed&three='1') |
| DCN | [hsa-miR-875-3p](http://bioinfo.life.hust.edu.cn/miRNASNP/#!/mirna?mirna_id=hsa-miR-875-3p&one='1') | [rs1325672064](http://bioinfo.life.hust.edu.cn/miRNASNP/#!/snp?snp_id=rs1325672064&location=Seed&one=1) | chr8:99536813 | C/T | -/- | [2,977](http://bioinfo.life.hust.edu.cn/miRNASNP/#!/snp?snp_id=rs1325672064&location=Seed&two='1') | [2,669](http://bioinfo.life.hust.edu.cn/miRNASNP/#!/snp?snp_id=rs1325672064&location=Seed&three='1') |

**Table S5** Molecule docking

| Gene symbol | Protein | PDB ID | Molecular name | Minimum binding free energy (kcal/mol) |
| --- | --- | --- | --- | --- |
| CXCL8 | IL-8 | 1ICW | foscarnet | -4.0 |
| CXCL12 | SDF 1 | 1A15 | chlorambucil | -5.2 |
| DCN | Decorin | AF-P07585-F1 | sirolimus | -7.5 |
