# Supplementary material
Source: Research Square preprint supplement (doi:10.21203/rs.3.rs-5336506/v1)
Supplement: Supplementary file 2 [file 53c226b8d05f8af4ab8704ee.docx]

| Gene | Forward 5’–3’ | Reverse 5’–3’ |
| --- | --- | --- |
| Rat-β-actin | CTTCCTGGGTATGGAATCCT | TCTTTACGGATGTCAACGTC |
| Rat-CXCL8 | TGTGCCCTTCAGATTGTTGC | GCCCTTCCCTAACACTGACT |
| Rat-CXCL12 | TGCAGTGTTCTGATCTGGGT | AATGCCTCTGGGCTGATCTT |
| Rat-DCN | GGAAGCTGCAAAGGAGAAGG | ATTTGGCAGGTGTTCCGATG |
| Rat-IGF1 | TTTCAGAGACAGCAGAGCACACAA | CACACAGAGCTGCAGAAATCAGG |

**Table S1** Primer sequence
