# Supplementary material
Source: Research Square preprint supplement (doi:10.21203/rs.3.rs-5336506/v1)
Supplement: Supplementary file 3 [file 5eca83ef26cdf1febc7ef847.docx]

**Table S4** Influence of SNP mutations on miRNA hub genes

| **mRNA** | **Mature miRNA** | **SNP ID** | **Position** | **Ref/Alt** | **Ref freq./Alt freq.** | **Gain** | **Loss** |
| --- | --- | --- | --- | --- | --- | --- | --- |
| IGF1 | [hsa-miR-1-3p](http://bioinfo.life.hust.edu.cn/miRNASNP/#!/mirna?mirna_id=hsa-miR-1-3p&one='1') | [rs1395109253](http://bioinfo.life.hust.edu.cn/miRNASNP/#!/snp?snp_id=rs1395109253&location=Seed&one=1) | chr18:21829034 | C/A | 1.0/- | [1,460](http://bioinfo.life.hust.edu.cn/miRNASNP/#!/snp?snp_id=rs1395109253&location=Seed&two='1') | [3,507](http://bioinfo.life.hust.edu.cn/miRNASNP/#!/snp?snp_id=rs1395109253&location=Seed&three='1') |
| IGF1 | [hsa-miR-1-3p](http://bioinfo.life.hust.edu.cn/miRNASNP/#!/mirna?mirna_id=hsa-miR-1-3p&one='1') | [rs1273198863](http://bioinfo.life.hust.edu.cn/miRNASNP/#!/snp?snp_id=rs1273198863&location=Seed&one=1) | chr18:21829035 | C/T | -/- | [3,353](http://bioinfo.life.hust.edu.cn/miRNASNP/#!/snp?snp_id=rs1273198863&location=Seed&two='1') | [2,169](http://bioinfo.life.hust.edu.cn/miRNASNP/#!/snp?snp_id=rs1273198863&location=Seed&three='1') |
| CXCL12 | [hsa-miR-141-3p](http://bioinfo.life.hust.edu.cn/miRNASNP/#!/mirna?mirna_id=hsa-miR-141-3p&one='1') | [rs1555150374](http://bioinfo.life.hust.edu.cn/miRNASNP/#!/snp?snp_id=rs1555150374&location=Seed&one=1) | chr12:6964158 | C/T | -/- | [2,331](http://bioinfo.life.hust.edu.cn/miRNASNP/#!/snp?snp_id=rs1555150374&location=Seed&two='1') | [983](http://bioinfo.life.hust.edu.cn/miRNASNP/#!/snp?snp_id=rs1555150374&location=Seed&three='1') |
| CXCL12 | [hsa-miR-141-3p](http://bioinfo.life.hust.edu.cn/miRNASNP/#!/mirna?mirna_id=hsa-miR-141-3p&one='1') | [rs1555150374](http://bioinfo.life.hust.edu.cn/miRNASNP/#!/snp?snp_id=rs1555150374&location=Seed&one=1) | chr12:6964158 | C/A | -/- | [3,438](http://bioinfo.life.hust.edu.cn/miRNASNP/#!/snp?snp_id=rs1555150374&location=Seed&two='1') | [462](http://bioinfo.life.hust.edu.cn/miRNASNP/#!/snp?snp_id=rs1555150374&location=Seed&three='1') |
| CXCL12 | [hsa-miR-141-3p](http://bioinfo.life.hust.edu.cn/miRNASNP/#!/mirna?mirna_id=hsa-miR-141-3p&one='1') | [rs782556563](http://bioinfo.life.hust.edu.cn/miRNASNP/#!/snp?snp_id=rs782556563&location=Seed&one=1) | chr12:6964159 | ACTGT/A | -/- | - | - |
| CXCL12 | [hsa-miR-144-3p](http://bioinfo.life.hust.edu.cn/miRNASNP/#!/mirna?mirna_id=hsa-miR-144-3p&one='1') | [rs1218721253](http://bioinfo.life.hust.edu.cn/miRNASNP/#!/snp?snp_id=rs1218721253&location=Seed&one=1) | chr17:28861562 | A/G | -/- | [3,619](http://bioinfo.life.hust.edu.cn/miRNASNP/#!/snp?snp_id=rs1218721253&location=Seed&two='1') | [2,048](http://bioinfo.life.hust.edu.cn/miRNASNP/#!/snp?snp_id=rs1218721253&location=Seed&three='1') |
| CXCL12 | [hsa-miR-144-3p](http://bioinfo.life.hust.edu.cn/miRNASNP/#!/mirna?mirna_id=hsa-miR-144-3p&one='1') | [rs917554219](http://bioinfo.life.hust.edu.cn/miRNASNP/#!/snp?snp_id=rs917554219&location=Seed&one=1) | chr17:28861563 | C/T | 1.0/- | [2,303](http://bioinfo.life.hust.edu.cn/miRNASNP/#!/snp?snp_id=rs917554219&location=Seed&two='1') | [2,425](http://bioinfo.life.hust.edu.cn/miRNASNP/#!/snp?snp_id=rs917554219&location=Seed&three='1') |
| CXCL12 | [hsa-miR-144-3p](http://bioinfo.life.hust.edu.cn/miRNASNP/#!/mirna?mirna_id=hsa-miR-144-3p&one='1') | [rs947719319](http://bioinfo.life.hust.edu.cn/miRNASNP/#!/snp?snp_id=rs947719319&location=Seed&one=1) | chr17:28861564 | T/G | -/- | [247](http://bioinfo.life.hust.edu.cn/miRNASNP/#!/snp?snp_id=rs947719319&location=Seed&two='1') | [5,582](http://bioinfo.life.hust.edu.cn/miRNASNP/#!/snp?snp_id=rs947719319&location=Seed&three='1') |
| CXCL12 | [hsa-miR-200a-3p](http://bioinfo.life.hust.edu.cn/miRNASNP/#!/mirna?mirna_id=hsa-miR-200a-3p&one='1') | [rs1377467792](http://bioinfo.life.hust.edu.cn/miRNASNP/#!/snp?snp_id=rs1377467792&location=Seed&one=1) | chr1:1167920 | A/G | 1.0/- | [426](http://bioinfo.life.hust.edu.cn/miRNASNP/#!/snp?snp_id=rs1377467792&location=Seed&two='1') | [5,725](http://bioinfo.life.hust.edu.cn/miRNASNP/#!/snp?snp_id=rs1377467792&location=Seed&three='1') |
| CXCL12 | [hsa-miR-200a-3p](http://bioinfo.life.hust.edu.cn/miRNASNP/#!/mirna?mirna_id=hsa-miR-200a-3p&one='1') | [rs749623182](http://bioinfo.life.hust.edu.cn/miRNASNP/#!/snp?snp_id=rs749623182&location=Seed&one=1) | chr1:1167920 | ACTGT/A | -/- | - | - |
| CXCL12 | [hsa-miR-200a-3p](http://bioinfo.life.hust.edu.cn/miRNASNP/#!/mirna?mirna_id=hsa-miR-200a-3p&one='1') | [rs1301032989](http://bioinfo.life.hust.edu.cn/miRNASNP/#!/snp?snp_id=rs1301032989&location=Seed&one=1) | chr1:1167923 | G/T | -/- | 0 | 0 |
| DCN | [hsa-miR-298](http://bioinfo.life.hust.edu.cn/miRNASNP/#!/mirna?mirna_id=hsa-miR-298&one='1') | [rs755174560](http://bioinfo.life.hust.edu.cn/miRNASNP/#!/snp?snp_id=rs755174560&location=Seed&one=1) | chr20:58818297 | T/C | -/- | [2,956](http://bioinfo.life.hust.edu.cn/miRNASNP/#!/snp?snp_id=rs755174560&location=Seed&two='1') | [2,718](http://bioinfo.life.hust.edu.cn/miRNASNP/#!/snp?snp_id=rs755174560&location=Seed&three='1') |
| DCN | [hsa-miR-298](http://bioinfo.life.hust.edu.cn/miRNASNP/#!/mirna?mirna_id=hsa-miR-298&one='1') | [rs1331296704](http://bioinfo.life.hust.edu.cn/miRNASNP/#!/snp?snp_id=rs1331296704&location=Seed&one=1) | chr20:58818298 | T/C | -/- | [2,946](http://bioinfo.life.hust.edu.cn/miRNASNP/#!/snp?snp_id=rs1331296704&location=Seed&two='1') | [2,803](http://bioinfo.life.hust.edu.cn/miRNASNP/#!/snp?snp_id=rs1331296704&location=Seed&three='1') |
| DCN | [hsa-miR-298](http://bioinfo.life.hust.edu.cn/miRNASNP/#!/mirna?mirna_id=hsa-miR-298&one='1') | [rs1235209161](http://bioinfo.life.hust.edu.cn/miRNASNP/#!/snp?snp_id=rs1235209161&location=Seed&one=1) | chr20:58818299 | C/T | -/- | [2,889](http://bioinfo.life.hust.edu.cn/miRNASNP/#!/snp?snp_id=rs1235209161&location=Seed&two='1') | [2,719](http://bioinfo.life.hust.edu.cn/miRNASNP/#!/snp?snp_id=rs1235209161&location=Seed&three='1') |
| CXCL12 | [hsa-miR-499a-3p](http://bioinfo.life.hust.edu.cn/miRNASNP/#!/mirna?mirna_id=hsa-miR-499a-3p&one='1') | [rs768246420](http://bioinfo.life.hust.edu.cn/miRNASNP/#!/snp?snp_id=rs768246420&location=Seed&one=1) | chr20:34990447 | C/T | -/- | [2,070](http://bioinfo.life.hust.edu.cn/miRNASNP/#!/snp?snp_id=rs768246420&location=Seed&two='1') | [3,153](http://bioinfo.life.hust.edu.cn/miRNASNP/#!/snp?snp_id=rs768246420&location=Seed&three='1') |
| CXCL12 | [hsa-miR-499a-3p](http://bioinfo.life.hust.edu.cn/miRNASNP/#!/mirna?mirna_id=hsa-miR-499a-3p&one='1') | [rs3746444](http://bioinfo.life.hust.edu.cn/miRNASNP/#!/snp?snp_id=rs3746444&location=Seed&one=1) | chr20:34990448 | A/G | 0.8171/0.1829 | [573](http://bioinfo.life.hust.edu.cn/miRNASNP/#!/snp?snp_id=rs3746444&location=Seed&two='1') | [5,392](http://bioinfo.life.hust.edu.cn/miRNASNP/#!/snp?snp_id=rs3746444&location=Seed&three='1') |
| CXCL12 | [hsa-miR-499a-3p](http://bioinfo.life.hust.edu.cn/miRNASNP/#!/mirna?mirna_id=hsa-miR-499a-3p&one='1') | [rs761417578](http://bioinfo.life.hust.edu.cn/miRNASNP/#!/snp?snp_id=rs761417578&location=Seed&one=1) | chr20:34990450 | C/A | -/- | [2,847](http://bioinfo.life.hust.edu.cn/miRNASNP/#!/snp?snp_id=rs761417578&location=Seed&two='1') | [2,496](http://bioinfo.life.hust.edu.cn/miRNASNP/#!/snp?snp_id=rs761417578&location=Seed&three='1') |
| CXCL12 | [hsa-miR-499a-3p](http://bioinfo.life.hust.edu.cn/miRNASNP/#!/mirna?mirna_id=hsa-miR-499a-3p&one='1') | [rs150018420](http://bioinfo.life.hust.edu.cn/miRNASNP/#!/snp?snp_id=rs150018420&location=Seed&one=1) | chr20:34990452 | C/T | 0.9995/0.0005 | 0 | 0 |
| DCN | [hsa-miR-541-3p](http://bioinfo.life.hust.edu.cn/miRNASNP/#!/mirna?mirna_id=hsa-miR-541-3p&one='1') | [rs1201957390](http://bioinfo.life.hust.edu.cn/miRNASNP/#!/snp?snp_id=rs1201957390&location=Seed&one=1) | chr14:101064549 | G/A | 1.0/- | [1,970](http://bioinfo.life.hust.edu.cn/miRNASNP/#!/snp?snp_id=rs1201957390&location=Seed&two='1') | [3,364](http://bioinfo.life.hust.edu.cn/miRNASNP/#!/snp?snp_id=rs1201957390&location=Seed&three='1') |
| IGF1 | [hsa-miR-5585-3p](http://bioinfo.life.hust.edu.cn/miRNASNP/#!/mirna?mirna_id=hsa-miR-5585-3p&one='1') | [rs1261632635](http://bioinfo.life.hust.edu.cn/miRNASNP/#!/snp?snp_id=rs1261632635&location=Seed&one=1) | chr1:32086988 | G/A | 1.0/- | [3,818](http://bioinfo.life.hust.edu.cn/miRNASNP/#!/snp?snp_id=rs1261632635&location=Seed&two='1') | [1,320](http://bioinfo.life.hust.edu.cn/miRNASNP/#!/snp?snp_id=rs1261632635&location=Seed&three='1') |
| IGF1 | [hsa-miR-5585-3p](http://bioinfo.life.hust.edu.cn/miRNASNP/#!/mirna?mirna_id=hsa-miR-5585-3p&one='1') | [rs141449846](http://bioinfo.life.hust.edu.cn/miRNASNP/#!/snp?snp_id=rs141449846&location=Seed&one=1) | chr1:32086991 | T/C | 0.9977/- | [2,889](http://bioinfo.life.hust.edu.cn/miRNASNP/#!/snp?snp_id=rs141449846&location=Seed&two='1') | [1,034](http://bioinfo.life.hust.edu.cn/miRNASNP/#!/snp?snp_id=rs141449846&location=Seed&three='1') |
| IGF1 | [hsa-miR-5585-3p](http://bioinfo.life.hust.edu.cn/miRNASNP/#!/mirna?mirna_id=hsa-miR-5585-3p&one='1') | [rs141449846](http://bioinfo.life.hust.edu.cn/miRNASNP/#!/snp?snp_id=rs141449846&location=Seed&one=1) | chr1:32086991 | T/G | 0.9977/0.0023 | [3,280](http://bioinfo.life.hust.edu.cn/miRNASNP/#!/snp?snp_id=rs141449846&location=Seed&two='1') | [681](http://bioinfo.life.hust.edu.cn/miRNASNP/#!/snp?snp_id=rs141449846&location=Seed&three='1') |
| DCN | [hsa-miR-875-3p](http://bioinfo.life.hust.edu.cn/miRNASNP/#!/mirna?mirna_id=hsa-miR-875-3p&one='1') | [rs1000558271](http://bioinfo.life.hust.edu.cn/miRNASNP/#!/snp?snp_id=rs1000558271&location=Seed&one=1) | chr8:99536812 | T/A | -/- | [1,355](http://bioinfo.life.hust.edu.cn/miRNASNP/#!/snp?snp_id=rs1000558271&location=Seed&two='1') | [4,743](http://bioinfo.life.hust.edu.cn/miRNASNP/#!/snp?snp_id=rs1000558271&location=Seed&three='1') |
| DCN | [hsa-miR-875-3p](http://bioinfo.life.hust.edu.cn/miRNASNP/#!/mirna?mirna_id=hsa-miR-875-3p&one='1') | [rs1325672064](http://bioinfo.life.hust.edu.cn/miRNASNP/#!/snp?snp_id=rs1325672064&location=Seed&one=1) | chr8:99536813 | C/T | -/- | [2,977](http://bioinfo.life.hust.edu.cn/miRNASNP/#!/snp?snp_id=rs1325672064&location=Seed&two='1') | [2,669](http://bioinfo.life.hust.edu.cn/miRNASNP/#!/snp?snp_id=rs1325672064&location=Seed&three='1') |
