# Supplementary material
Source: Research Square preprint supplement (doi:10.21203/rs.3.rs-5336506/v1)
Supplement: Supplementary file 5 [file 9c790c7aecee3df0b4f1fb6d.docx]

| Table S2 GO enrichment analysis | |  |  |  | |  | |  | |  | |  |  | |  |  |  |
| --- | --- | --- | --- | --- | --- | --- | --- | --- | --- | --- | --- | --- | --- | --- | --- | --- | --- |
| ONTOLOGY | ID | Description | | GeneRatio | BgRatio | | *P* | *Padj* | q-value | | geneID | | | Count |
| BP | GO:0001558 | regulation of cell growth | | 12/75 | 422/18903 | | 9.62E-08 | 0.00019 | 0.000143 | | S100A9/S100A8/IGF1/CXCL12/SFRP2/IGFBP5/KRT17/SFN/SPHK1/IGFBP4/PI16/IGFBP7 | | | 12 |
| BP | GO:0030307 | positive regulation of cell growth | | 8/75 | 167/18903 | | 3.20E-07 | 0.000316 | 0.000239 | | S100A9/S100A8/IGF1/CXCL12/SFRP2/KRT17/SFN/SPHK1 | | | 8 |
| BP | GO:0016049 | cell growth | | 12/75 | 493/18903 | | 5.09E-07 | 0.000335 | 0.000253 | | S100A9/S100A8/IGF1/CXCL12/SFRP2/IGFBP5/KRT17/SFN/SPHK1/IGFBP4/PI16/IGFBP7 | | | 12 |
| BP | GO:2001233 | regulation of apoptotic signaling pathway | | 10/75 | 374/18903 | | 2.15E-06 | 0.000952 | 0.00072 | | S100A9/S100A8/IGF1/CXCL12/SFRP2/GSTP1/MIF/CLU/TIMP3/CTSH | | | 10 |
| BP | GO:0043567 | regulation of insulin-like growth factor receptor signaling pathway | | 4/75 | 25/18903 | | 2.71E-06 | 0.000952 | 0.00072 | | IGF1/IGFBP5/IGFBP6/IGFBP4 | | | 4 |
| BP | GO:0050900 | leukocyte migration | | 10/75 | 398/18903 | | 3.75E-06 | 0.000952 | 0.00072 | | S100A9/S100A8/APOD/EPS8/CXCL12/S100A14/MIF/CXCL8/CXCL2/CCL3 | | | 10 |
| BP | GO:0060326 | cell chemotaxis | | 9/75 | 319/18903 | | 4.69E-06 | 0.000952 | 0.00072 | | S100A9/S100A8/CXCL12/S100A14/MIF/CXCL8/CXCL2/CXCL14/CCL3 | | | 9 |
| BP | GO:0006959 | humoral immune response | | 9/75 | 320/18903 | | 4.81E-06 | 0.000952 | 0.00072 | | S100A9/CFH/CLU/CXCL8/CXCL2/CFD/A2M/CXCL14/VSIG4 | | | 9 |
| BP | GO:0030595 | leukocyte chemotaxis | | 8/75 | 240/18903 | | 4.87E-06 | 0.000952 | 0.00072 | | S100A9/S100A8/CXCL12/S100A14/MIF/CXCL8/CXCL2/CCL3 | | | 8 |
| BP | GO:0097529 | myeloid leukocyte migration | | 8/75 | 242/18903 | | 5.18E-06 | 0.000952 | 0.00072 | | S100A9/S100A8/CXCL12/S100A14/MIF/CXCL8/CXCL2/CCL3 | | | 8 |
| BP | GO:0050918 | positive chemotaxis | | 5/75 | 64/18903 | | 5.46E-06 | 0.000952 | 0.00072 | | CXCL12/MIF/CXCL8/CCL3/GPNMB | | | 5 |
| BP | GO:1902230 | negative regulation of intrinsic apoptotic signaling pathway in response to DNA damage | | 4/75 | 30/18903 | | 5.79E-06 | 0.000952 | 0.00072 | | CXCL12/SFRP2/MIF/CLU | | | 4 |
| BP | GO:0032496 | response to lipopolysaccharide | | 9/75 | 339/18903 | | 7.66E-06 | 0.001095 | 0.000828 | | S100A9/S100A8/S100A14/GSTP1/MIF/CXCL8/CXCL2/VIM/CCL3 | | | 9 |
| BP | GO:0032640 | tumor necrosis factor production | | 7/75 | 184/18903 | | 8.39E-06 | 0.001095 | 0.000828 | | ZBTB20/IGF1/GSTP1/MIF/CLU/CCL3/GPNMB | | | 7 |
| BP | GO:0032680 | regulation of tumor necrosis factor production | | 7/75 | 184/18903 | | 8.39E-06 | 0.001095 | 0.000828 | | ZBTB20/IGF1/GSTP1/MIF/CLU/CCL3/GPNMB | | | 7 |
| BP | GO:0045927 | positive regulation of growth | | 8/75 | 261/18903 | | 9.01E-06 | 0.001095 | 0.000828 | | S100A9/S100A8/IGF1/CXCL12/SFRP2/KRT17/SFN/SPHK1 | | | 8 |
| BP | GO:0071706 | tumor necrosis factor superfamily cytokine production | | 7/75 | 189/18903 | | 9.99E-06 | 0.001095 | 0.000828 | | ZBTB20/IGF1/GSTP1/MIF/CLU/CCL3/GPNMB | | | 7 |
| BP | GO:1903555 | regulation of tumor necrosis factor superfamily cytokine production | | 7/75 | 189/18903 | | 9.99E-06 | 0.001095 | 0.000828 | | ZBTB20/IGF1/GSTP1/MIF/CLU/CCL3/GPNMB | | | 7 |
| BP | GO:0002237 | response to molecule of bacterial origin | | 9/75 | 360/18903 | | 1.24E-05 | 0.001171 | 0.000885 | | S100A9/S100A8/S100A14/GSTP1/MIF/CXCL8/CXCL2/VIM/CCL3 | | | 9 |
| BP | GO:0071621 | granulocyte chemotaxis | | 6/75 | 130/18903 | | 1.29E-05 | 0.001171 | 0.000885 | | S100A9/S100A8/S100A14/CXCL8/CXCL2/CCL3 | | | 6 |
| BP | GO:0008544 | epidermis development | | 9/75 | 362/18903 | | 1.29E-05 | 0.001171 | 0.000885 | | KRT2/IGFBP5/EREG/KRT17/TXNIP/KRT14/SFN/APCDD1/SFRP4 | | | 9 |
| BP | GO:0052547 | regulation of peptidase activity | | 10/75 | 459/18903 | | 1.31E-05 | 0.001171 | 0.000885 | | S100A9/S100A8/CLDN4/SFRP2/SFN/A2M/TIMP3/CTSH/GSN/PI16 | | | 10 |
| BP | GO:0048009 | insulin-like growth factor receptor signaling pathway | | 4/75 | 38/18903 | | 1.52E-05 | 0.001251 | 0.000947 | | IGF1/IGFBP5/IGFBP6/IGFBP4 | | | 4 |
| BP | GO:1902229 | regulation of intrinsic apoptotic signaling pathway in response to DNA damage | | 4/75 | 38/18903 | | 1.52E-05 | 0.001251 | 0.000947 | | CXCL12/SFRP2/MIF/CLU | | | 4 |
| BP | GO:0043568 | positive regulation of insulin-like growth factor receptor signaling pathway | | 3/75 | 13/18903 | | 1.67E-05 | 0.001315 | 0.000995 | | IGF1/IGFBP5/IGFBP4 | | | 3 |
| BP | GO:0048145 | regulation of fibroblast proliferation | | 5/75 | 87/18903 | | 2.46E-05 | 0.001868 | 0.001413 | | IGF1/GSTP1/EREG/MIF/SPHK1 | | | 5 |
| BP | GO:0043588 | skin development | | 8/75 | 302/18903 | | 2.58E-05 | 0.001884 | 0.001425 | | KRT2/CLDN4/IGFBP5/EREG/KRT17/TXNIP/SFN/APCDD1 | | | 8 |
| BP | GO:0097530 | granulocyte migration | | 6/75 | 158/18903 | | 3.88E-05 | 0.002732 | 0.002067 | | S100A9/S100A8/S100A14/CXCL8/CXCL2/CCL3 | | | 6 |
| BP | GO:0006957 | complement activation, alternative pathway | | 3/75 | 18/18903 | | 4.69E-05 | 0.003189 | 0.002412 | | CFH/CFD/VSIG4 | | | 3 |
| BP | GO:0001503 | ossification | | 9/75 | 429/18903 | | 4.90E-05 | 0.003223 | 0.002438 | | IGF1/MGP/SFRP2/IGFBP5/JUNB/CTSK/VCAN/CCL3/ASPN | | | 9 |
| BP | GO:0008630 | intrinsic apoptotic signaling pathway in response to DNA damage | | 5/75 | 102/18903 | | 5.30E-05 | 0.003373 | 0.002551 | | CXCL12/SFRP2/MIF/CLU/SFN | | | 5 |
| BP | GO:0048144 | fibroblast proliferation | | 5/75 | 103/18903 | | 5.56E-05 | 0.003423 | 0.002589 | | IGF1/GSTP1/EREG/MIF/SPHK1 | | | 5 |
| BP | GO:0048146 | positive regulation of fibroblast proliferation | | 4/75 | 53/18903 | | 5.78E-05 | 0.003452 | 0.002611 | | IGF1/EREG/MIF/SPHK1 | | | 4 |
| BP | GO:0070371 | ERK1 and ERK2 cascade | | 8/75 | 340/18903 | | 5.97E-05 | 0.003461 | 0.002618 | | IGF1/GSTP1/MIF/DUSP5/TIMP3/CTSH/CCL3/GPNMB | | | 8 |
| BP | GO:2001242 | regulation of intrinsic apoptotic signaling pathway | | 6/75 | 172/18903 | | 6.23E-05 | 0.00349 | 0.00264 | | S100A9/S100A8/CXCL12/SFRP2/MIF/CLU | | | 6 |
| BP | GO:0030593 | neutrophil chemotaxis | | 5/75 | 106/18903 | | 6.37E-05 | 0.00349 | 0.00264 | | S100A9/S100A8/CXCL8/CXCL2/CCL3 | | | 5 |
| BP | GO:0042116 | macrophage activation | | 5/75 | 109/18903 | | 7.28E-05 | 0.003879 | 0.002934 | | MIF/CLU/SPHK1/VSIG4/CCL3 | | | 5 |
| BP | GO:0071216 | cellular response to biotic stimulus | | 7/75 | 261/18903 | | 7.87E-05 | 0.004085 | 0.00309 | | GSTP1/TXNIP/MIF/CXCL8/CXCL2/VIM/CCL3 | | | 7 |
| BP | GO:0030449 | regulation of complement activation | | 3/75 | 22/18903 | | 8.75E-05 | 0.004425 | 0.003347 | | CFH/A2M/VSIG4 | | | 3 |
| BP | GO:0021782 | glial cell development | | 5/75 | 117/18903 | | 0.000102 | 0.005021 | 0.003798 | | S100A9/S100A8/CLU/VIM/PHGDH | | | 5 |
| BP | GO:0043030 | regulation of macrophage activation | | 4/75 | 62/18903 | | 0.000107 | 0.005152 | 0.003897 | | MIF/SPHK1/VSIG4/CCL3 | | | 4 |
| BP | GO:0010952 | positive regulation of peptidase activity | | 6/75 | 194/18903 | | 0.000121 | 0.005679 | 0.004296 | | S100A9/S100A8/CLDN4/SFRP2/CTSH/GSN | | | 6 |
| BP | GO:0051216 | cartilage development | | 6/75 | 201/18903 | | 0.000147 | 0.006716 | 0.00508 | | MGP/SFRP2/PRRX1/CTSK/BGN/EFEMP1 | | | 6 |
| BP | GO:0002688 | regulation of leukocyte chemotaxis | | 5/75 | 127/18903 | | 0.00015 | 0.006716 | 0.00508 | | CXCL12/S100A14/MIF/CXCL8/CCL3 | | | 5 |
| BP | GO:0045109 | intermediate filament organization | | 4/75 | 69/18903 | | 0.000163 | 0.007005 | 0.005299 | | KRT2/KRT17/KRT14/VIM | | | 4 |
| BP | GO:0043281 | regulation of cysteine-type endopeptidase activity involved in apoptotic process | | 6/75 | 205/18903 | | 0.000163 | 0.007005 | 0.005299 | | S100A9/S100A8/SFRP2/SFN/CTSH/GSN | | | 6 |
| BP | GO:1990266 | neutrophil migration | | 5/75 | 130/18903 | | 0.000167 | 0.007014 | 0.005305 | | S100A9/S100A8/CXCL8/CXCL2/CCL3 | | | 5 |
| BP | GO:0097193 | intrinsic apoptotic signaling pathway | | 7/75 | 298/18903 | | 0.000179 | 0.007226 | 0.005465 | | S100A9/S100A8/CXCL12/SFRP2/MIF/CLU/SFN | | | 7 |
| BP | GO:0006956 | complement activation | | 5/75 | 132/18903 | | 0.00018 | 0.007226 | 0.005465 | | CFH/CLU/CFD/A2M/VSIG4 | | | 5 |
| BP | GO:0150076 | neuroinflammatory response | | 4/75 | 73/18903 | | 0.000202 | 0.007976 | 0.006033 | | IGF1/CLU/SPHK1/CCL3 | | | 4 |
| BP | GO:0042063 | gliogenesis | | 7/75 | 310/18903 | | 0.000228 | 0.008814 | 0.006666 | | S100A9/S100A8/CLU/VIM/APCDD1/PHGDH/CCL3 | | | 7 |
| BP | GO:0071222 | cellular response to lipopolysaccharide | | 6/75 | 222/18903 | | 0.000251 | 0.009533 | 0.007211 | | GSTP1/MIF/CXCL8/CXCL2/VIM/CCL3 | | | 6 |
| BP | GO:0052548 | regulation of endopeptidase activity | | 8/75 | 428/18903 | | 0.00029 | 0.010785 | 0.008157 | | S100A9/S100A8/SFRP2/SFN/A2M/TIMP3/CTSH/GSN | | | 8 |
| BP | GO:0045684 | positive regulation of epidermis development | | 3/75 | 33/18903 | | 0.0003 | 0.010821 | 0.008185 | | KRT2/SFN/SFRP4 | | | 3 |
| BP | GO:0061844 | antimicrobial humoral immune response mediated by antimicrobial peptide | | 4/75 | 81/18903 | | 0.000302 | 0.010821 | 0.008185 | | S100A9/CXCL8/CXCL2/CXCL14 | | | 4 |
| BP | GO:0002685 | regulation of leukocyte migration | | 6/75 | 231/18903 | | 0.000311 | 0.010944 | 0.008278 | | APOD/CXCL12/S100A14/MIF/CXCL8/CCL3 | | | 6 |
| BP | GO:2001021 | negative regulation of response to DNA damage stimulus | | 4/75 | 82/18903 | | 0.000316 | 0.010944 | 0.008278 | | CXCL12/SFRP2/MIF/CLU | | | 4 |
| BP | GO:2001234 | negative regulation of apoptotic signaling pathway | | 6/75 | 233/18903 | | 0.000326 | 0.011022 | 0.008337 | | IGF1/CXCL12/SFRP2/GSTP1/MIF/CLU | | | 6 |
| BP | GO:0071219 | cellular response to molecule of bacterial origin | | 6/75 | 234/18903 | | 0.000333 | 0.011022 | 0.008337 | | GSTP1/MIF/CXCL8/CXCL2/VIM/CCL3 | | | 6 |
| BP | GO:0009913 | epidermal cell differentiation | | 6/75 | 235/18903 | | 0.000341 | 0.011022 | 0.008337 | | KRT2/EREG/KRT17/TXNIP/SFN/SFRP4 | | | 6 |
| BP | GO:2000116 | regulation of cysteine-type endopeptidase activity | | 6/75 | 235/18903 | | 0.000341 | 0.011022 | 0.008337 | | S100A9/S100A8/SFRP2/SFN/CTSH/GSN | | | 6 |
| BP | GO:0002274 | myeloid leukocyte activation | | 6/75 | 237/18903 | | 0.000357 | 0.011218 | 0.008485 | | MIF/CLU/CXCL8/SPHK1/VSIG4/CCL3 | | | 6 |
| BP | GO:0048048 | embryonic eye morphogenesis | | 3/75 | 35/18903 | | 0.000358 | 0.011218 | 0.008485 | | FBN1/MFAP5/EFEMP1 | | | 3 |
| BP | GO:0090287 | regulation of cellular response to growth factor stimulus | | 7/75 | 338/18903 | | 0.000385 | 0.011827 | 0.008946 | | ZEB2/FBN1/SFRP2/DCN/FSTL1/SFRP4/ASPN | | | 7 |
| BP | GO:0018149 | peptide cross-linking | | 3/75 | 36/18903 | | 0.00039 | 0.011827 | 0.008946 | | KRT2/DCN/BGN | | | 3 |
| BP | GO:0002683 | negative regulation of immune system process | | 8/75 | 449/18903 | | 0.000399 | 0.011926 | 0.00902 | | APOD/CXCL12/FBN1/MIF/A2M/VSIG4/CCL3/GPNMB | | | 8 |
| BP | GO:0045104 | intermediate filament cytoskeleton organization | | 4/75 | 89/18903 | | 0.000432 | 0.012608 | 0.009536 | | KRT2/KRT17/KRT14/VIM | | | 4 |
| BP | GO:0001649 | osteoblast differentiation | | 6/75 | 246/18903 | | 0.000435 | 0.012608 | 0.009536 | | IGF1/SFRP2/IGFBP5/JUNB/VCAN/CCL3 | | | 6 |
| BP | GO:0045103 | intermediate filament-based process | | 4/75 | 90/18903 | | 0.000451 | 0.012711 | 0.009614 | | KRT2/KRT17/KRT14/VIM | | | 4 |
| BP | GO:0070098 | chemokine-mediated signaling pathway | | 4/75 | 90/18903 | | 0.000451 | 0.012711 | 0.009614 | | CXCL12/CXCL8/CXCL2/CCL3 | | | 4 |
| BP | GO:0070661 | leukocyte proliferation | | 7/75 | 348/18903 | | 0.000458 | 0.012716 | 0.009618 | | IGF1/GSTP1/JUNB/MIF/CLU/VSIG4/GPNMB | | | 7 |
| BP | GO:0032103 | positive regulation of response to external stimulus | | 8/75 | 464/18903 | | 0.000496 | 0.013589 | 0.010278 | | S100A9/S100A8/CXCL12/S100A14/EREG/MIF/CXCL8/CCL3 | | | 8 |
| BP | GO:0097305 | response to alcohol | | 6/75 | 253/18903 | | 0.000504 | 0.013621 | 0.010303 | | S100A8/EPS8/CTSK/A2M/CCL3/IGFBP7 | | | 6 |
| BP | GO:0150077 | regulation of neuroinflammatory response | | 3/75 | 41/18903 | | 0.000574 | 0.015144 | 0.011455 | | IGF1/SPHK1/CCL3 | | | 3 |
| BP | GO:0030216 | keratinocyte differentiation | | 5/75 | 170/18903 | | 0.000576 | 0.015144 | 0.011455 | | KRT2/EREG/KRT17/TXNIP/SFN | | | 5 |
| BP | GO:0002690 | positive regulation of leukocyte chemotaxis | | 4/75 | 97/18903 | | 0.000599 | 0.015205 | 0.011501 | | CXCL12/S100A14/CXCL8/CCL3 | | | 4 |
| BP | GO:0014002 | astrocyte development | | 3/75 | 42/18903 | | 0.000616 | 0.015205 | 0.011501 | | S100A9/S100A8/VIM | | | 3 |
| BP | GO:1990868 | response to chemokine | | 4/75 | 98/18903 | | 0.000623 | 0.015205 | 0.011501 | | CXCL12/CXCL8/CXCL2/CCL3 | | | 4 |
| BP | GO:1990869 | cellular response to chemokine | | 4/75 | 98/18903 | | 0.000623 | 0.015205 | 0.011501 | | CXCL12/CXCL8/CXCL2/CCL3 | | | 4 |
| BP | GO:0050673 | epithelial cell proliferation | | 8/75 | 481/18903 | | 0.000628 | 0.015205 | 0.011501 | | IGF1/KRT2/CXCL12/SFRP2/IGFBP5/EREG/SFN/IGFBP4 | | | 8 |
| BP | GO:0030336 | negative regulation of cell migration | | 7/75 | 368/18903 | | 0.000638 | 0.015205 | 0.011501 | | APOD/CXCL12/TPM1/SFRP2/IGFBP5/DCN/MIF | | | 7 |
| BP | GO:0010950 | positive regulation of endopeptidase activity | | 5/75 | 174/18903 | | 0.00064 | 0.015205 | 0.011501 | | S100A9/S100A8/SFRP2/CTSH/GSN | | | 5 |
| BP | GO:0030178 | negative regulation of Wnt signaling pathway | | 5/75 | 174/18903 | | 0.00064 | 0.015205 | 0.011501 | | SFRP2/IGFBP6/IGFBP4/APCDD1/SFRP4 | | | 5 |
| BP | GO:0048660 | regulation of smooth muscle cell proliferation | | 5/75 | 175/18903 | | 0.000657 | 0.015419 | 0.011663 | | APOD/IGF1/TPM1/IGFBP5/EREG | | | 5 |
| BP | GO:0045862 | positive regulation of proteolysis | | 7/75 | 372/18903 | | 0.00068 | 0.015772 | 0.01193 | | S100A9/S100A8/CLDN4/SFRP2/CLU/CTSH/GSN | | | 7 |
| BP | GO:2001243 | negative regulation of intrinsic apoptotic signaling pathway | | 4/75 | 101/18903 | | 0.000698 | 0.015998 | 0.0121 | | CXCL12/SFRP2/MIF/CLU | | | 4 |
| BP | GO:0045840 | positive regulation of mitotic nuclear division | | 3/75 | 44/18903 | | 0.000707 | 0.016022 | 0.012118 | | IGF1/EREG/SPHK1 | | | 3 |
| BP | GO:0048659 | smooth muscle cell proliferation | | 5/75 | 179/18903 | | 0.000727 | 0.016299 | 0.012328 | | APOD/IGF1/TPM1/IGFBP5/EREG | | | 5 |
| BP | GO:0061448 | connective tissue development | | 6/75 | 274/18903 | | 0.000766 | 0.016964 | 0.012831 | | MGP/SFRP2/PRRX1/CTSK/BGN/EFEMP1 | | | 6 |
| BP | GO:0002920 | regulation of humoral immune response | | 3/75 | 46/18903 | | 0.000806 | 0.017301 | 0.013086 | | CFH/A2M/VSIG4 | | | 3 |
| BP | GO:2000146 | negative regulation of cell motility | | 7/75 | 383/18903 | | 0.000807 | 0.017301 | 0.013086 | | APOD/CXCL12/TPM1/SFRP2/IGFBP5/DCN/MIF | | | 7 |
| BP | GO:0032760 | positive regulation of tumor necrosis factor production | | 4/75 | 105/18903 | | 0.000807 | 0.017301 | 0.013086 | | ZBTB20/MIF/CLU/CCL3 | | | 4 |
| BP | GO:0048563 | post-embryonic animal organ morphogenesis | | 2/75 | 11/18903 | | 0.000835 | 0.0177 | 0.013388 | | FBN1/EFEMP1 | | | 2 |
| BP | GO:0001774 | microglial cell activation | | 3/75 | 47/18903 | | 0.000858 | 0.018001 | 0.013615 | | CLU/SPHK1/CCL3 | | | 3 |
| BP | GO:0007178 | transmembrane receptor protein serine/threonine kinase signaling pathway | | 7/75 | 390/18903 | | 0.000897 | 0.018614 | 0.014079 | | ZEB2/FBN1/SFRP2/FSTL1/VIM/SFRP4/ASPN | | | 7 |
| BP | GO:1903557 | positive regulation of tumor necrosis factor superfamily cytokine production | | 4/75 | 109/18903 | | 0.000928 | 0.019067 | 0.014422 | | ZBTB20/MIF/CLU/CCL3 | | | 4 |
| BP | GO:0030510 | regulation of BMP signaling pathway | | 4/75 | 111/18903 | | 0.000993 | 0.019786 | 0.014965 | | FBN1/SFRP2/FSTL1/SFRP4 | | | 4 |
| BP | GO:0032611 | interleukin-1 beta production | | 4/75 | 111/18903 | | 0.000993 | 0.019786 | 0.014965 | | IGF1/GSTP1/SPHK1/CCL3 | | | 4 |
| BP | GO:0032651 | regulation of interleukin-1 beta production | | 4/75 | 111/18903 | | 0.000993 | 0.019786 | 0.014965 | | IGF1/GSTP1/SPHK1/CCL3 | | | 4 |
| BP | GO:0090092 | regulation of transmembrane receptor protein serine/threonine kinase signaling pathway | | 6/75 | 290/18903 | | 0.001027 | 0.020079 | 0.015187 | | ZEB2/FBN1/SFRP2/FSTL1/SFRP4/ASPN | | | 6 |
| BP | GO:0002269 | leukocyte activation involved in inflammatory response | | 3/75 | 50/18903 | | 0.001028 | 0.020079 | 0.015187 | | CLU/SPHK1/CCL3 | | | 3 |
| BP | GO:0009408 | response to heat | | 4/75 | 114/18903 | | 0.001097 | 0.021206 | 0.01604 | | IGF1/CXCL12/HSPA6/IGFBP7 | | | 4 |
| BP | GO:0042303 | molting cycle | | 4/75 | 115/18903 | | 0.001133 | 0.021484 | 0.01625 | | IGFBP5/KRT17/KRT14/APCDD1 | | | 4 |
| BP | GO:0042633 | hair cycle | | 4/75 | 115/18903 | | 0.001133 | 0.021484 | 0.01625 | | IGFBP5/KRT17/KRT14/APCDD1 | | | 4 |
| BP | GO:0003334 | keratinocyte development | | 2/75 | 13/18903 | | 0.001178 | 0.021706 | 0.016418 | | KRT2/SFN | | | 2 |
| BP | GO:0045916 | negative regulation of complement activation | | 2/75 | 13/18903 | | 0.001178 | 0.021706 | 0.016418 | | A2M/VSIG4 | | | 2 |
| BP | GO:0070486 | leukocyte aggregation | | 2/75 | 13/18903 | | 0.001178 | 0.021706 | 0.016418 | | S100A9/S100A8 | | | 2 |
| BP | GO:0061900 | glial cell activation | | 3/75 | 54/18903 | | 0.001287 | 0.023494 | 0.017771 | | CLU/SPHK1/CCL3 | | | 3 |
| BP | GO:0000302 | response to reactive oxygen species | | 5/75 | 204/18903 | | 0.001304 | 0.023598 | 0.017849 | | APOD/TPM1/GSTP1/TXNIP/SPHK1 | | | 5 |
| BP | GO:0002686 | negative regulation of leukocyte migration | | 3/75 | 55/18903 | | 0.001357 | 0.023707 | 0.017932 | | APOD/CXCL12/MIF | | | 3 |
| BP | GO:0043616 | keratinocyte proliferation | | 3/75 | 55/18903 | | 0.001357 | 0.023707 | 0.017932 | | KRT2/EREG/SFN | | | 3 |
| BP | GO:0040013 | negative regulation of locomotion | | 7/75 | 419/18903 | | 0.001358 | 0.023707 | 0.017932 | | APOD/CXCL12/TPM1/SFRP2/IGFBP5/DCN/MIF | | | 7 |
| BP | GO:0071674 | mononuclear cell migration | | 5/75 | 206/18903 | | 0.001362 | 0.023707 | 0.017932 | | APOD/EPS8/CXCL12/S100A14/CCL3 | | | 5 |
| BP | GO:0050930 | induction of positive chemotaxis | | 2/75 | 14/18903 | | 0.001371 | 0.023707 | 0.017932 | | CXCL12/CXCL8 | | | 2 |
| BP | GO:0043500 | muscle adaptation | | 4/75 | 122/18903 | | 0.00141 | 0.024075 | 0.01821 | | IGF1/IGFBP5/GSN/PI16 | | | 4 |
| BP | GO:0001836 | release of cytochrome c from mitochondria | | 3/75 | 56/18903 | | 0.00143 | 0.024075 | 0.01821 | | IGF1/CLU/SFN | | | 3 |
| BP | GO:0050832 | defense response to fungus | | 3/75 | 56/18903 | | 0.00143 | 0.024075 | 0.01821 | | S100A9/DCD/S100A8 | | | 3 |
| BP | GO:0030282 | bone mineralization | | 4/75 | 123/18903 | | 0.001453 | 0.024075 | 0.01821 | | IGF1/MGP/CCL3/ASPN | | | 4 |
| BP | GO:0071675 | regulation of mononuclear cell migration | | 4/75 | 123/18903 | | 0.001453 | 0.024075 | 0.01821 | | APOD/CXCL12/S100A14/CCL3 | | | 4 |
| BP | GO:0019730 | antimicrobial humoral response | | 4/75 | 125/18903 | | 0.001542 | 0.02465 | 0.018645 | | S100A9/CXCL8/CXCL2/CXCL14 | | | 4 |
| BP | GO:0043280 | positive regulation of cysteine-type endopeptidase activity involved in apoptotic process | | 4/75 | 125/18903 | | 0.001542 | 0.02465 | 0.018645 | | S100A9/S100A8/CTSH/GSN | | | 4 |
| BP | GO:0070372 | regulation of ERK1 and ERK2 cascade | | 6/75 | 315/18903 | | 0.001567 | 0.02465 | 0.018645 | | IGF1/GSTP1/MIF/TIMP3/CCL3/GPNMB | | | 6 |
| BP | GO:0003214 | cardiac left ventricle morphogenesis | | 2/75 | 15/18903 | | 0.001577 | 0.02465 | 0.018645 | | SFRP2/CPE | | | 2 |
| BP | GO:0009886 | post-embryonic animal morphogenesis | | 2/75 | 15/18903 | | 0.001577 | 0.02465 | 0.018645 | | FBN1/EFEMP1 | | | 2 |
| BP | GO:0070207 | protein homotrimerization | | 2/75 | 15/18903 | | 0.001577 | 0.02465 | 0.018645 | | MIF/STEAP4 | | | 2 |
| BP | GO:0090280 | positive regulation of calcium ion import | | 2/75 | 15/18903 | | 0.001577 | 0.02465 | 0.018645 | | CXCL12/CCL3 | | | 2 |
| BP | GO:0003231 | cardiac ventricle development | | 4/75 | 126/18903 | | 0.001587 | 0.02465 | 0.018645 | | TPM1/SFRP2/CPE/LMO4 | | | 4 |
| BP | GO:0051785 | positive regulation of nuclear division | | 3/75 | 59/18903 | | 0.001663 | 0.025615 | 0.019375 | | IGF1/EREG/SPHK1 | | | 3 |
| BP | GO:0032612 | interleukin-1 production | | 4/75 | 130/18903 | | 0.00178 | 0.026861 | 0.020317 | | IGF1/GSTP1/SPHK1/CCL3 | | | 4 |
| BP | GO:0032652 | regulation of interleukin-1 production | | 4/75 | 130/18903 | | 0.00178 | 0.026861 | 0.020317 | | IGF1/GSTP1/SPHK1/CCL3 | | | 4 |
| BP | GO:0043508 | negative regulation of JUN kinase activity | | 2/75 | 16/18903 | | 0.001798 | 0.026861 | 0.020317 | | SFRP2/GSTP1 | | | 2 |
| BP | GO:0061684 | chaperone-mediated autophagy | | 2/75 | 16/18903 | | 0.001798 | 0.026861 | 0.020317 | | SYNPO2/CLU | | | 2 |
| BP | GO:0048568 | embryonic organ development | | 7/75 | 449/18903 | | 0.002012 | 0.029198 | 0.022085 | | FBN1/JUNB/PRRX1/CXCL8/A2M/MFAP5/EFEMP1 | | | 7 |
| BP | GO:0002921 | negative regulation of humoral immune response | | 2/75 | 17/18903 | | 0.002033 | 0.029198 | 0.022085 | | A2M/VSIG4 | | | 2 |
| BP | GO:0017014 | protein nitrosylation | | 2/75 | 17/18903 | | 0.002033 | 0.029198 | 0.022085 | | S100A9/S100A8 | | | 2 |
| BP | GO:0018119 | peptidyl-cysteine S-nitrosylation | | 2/75 | 17/18903 | | 0.002033 | 0.029198 | 0.022085 | | S100A9/S100A8 | | | 2 |
| BP | GO:0070206 | protein trimerization | | 2/75 | 17/18903 | | 0.002033 | 0.029198 | 0.022085 | | MIF/STEAP4 | | | 2 |
| BP | GO:2001235 | positive regulation of apoptotic signaling pathway | | 4/75 | 135/18903 | | 0.002043 | 0.029198 | 0.022085 | | S100A9/S100A8/TIMP3/CTSH | | | 4 |
| BP | GO:0010001 | glial cell differentiation | | 5/75 | 227/18903 | | 0.002085 | 0.029574 | 0.022369 | | S100A9/S100A8/CLU/VIM/PHGDH | | | 5 |
| BP | GO:0030111 | regulation of Wnt signaling pathway | | 6/75 | 336/18903 | | 0.002169 | 0.030553 | 0.023109 | | ZEB2/SFRP2/IGFBP6/IGFBP4/APCDD1/SFRP4 | | | 6 |
| BP | GO:0016055 | Wnt signaling pathway | | 7/75 | 456/18903 | | 0.002195 | 0.030649 | 0.023182 | | ZEB2/SFRP2/IGFBP6/IGFBP4/APCDD1/SFRP4/CPE | | | 7 |
| BP | GO:0050920 | regulation of chemotaxis | | 5/75 | 230/18903 | | 0.002207 | 0.030649 | 0.023182 | | CXCL12/S100A14/MIF/CXCL8/CCL3 | | | 5 |
| BP | GO:0198738 | cell-cell signaling by wnt | | 7/75 | 458/18903 | | 0.002249 | 0.03102 | 0.023463 | | ZEB2/SFRP2/IGFBP6/IGFBP4/APCDD1/SFRP4/CPE | | | 7 |
| BP | GO:0048569 | post-embryonic animal organ development | | 2/75 | 18/18903 | | 0.002281 | 0.031203 | 0.023602 | | FBN1/EFEMP1 | | | 2 |
| BP | GO:0045682 | regulation of epidermis development | | 3/75 | 66/18903 | | 0.002294 | 0.031203 | 0.023602 | | KRT2/SFN/SFRP4 | | | 3 |
| BP | GO:0071356 | cellular response to tumor necrosis factor | | 5/75 | 234/18903 | | 0.002378 | 0.031913 | 0.024139 | | GSTP1/CTSK/CXCL8/SPHK1/CCL3 | | | 5 |
| BP | GO:0090090 | negative regulation of canonical Wnt signaling pathway | | 4/75 | 141/18903 | | 0.002393 | 0.031913 | 0.024139 | | SFRP2/IGFBP6/IGFBP4/SFRP4 | | | 4 |
| BP | GO:0009620 | response to fungus | | 3/75 | 67/18903 | | 0.002395 | 0.031913 | 0.024139 | | S100A9/DCD/S100A8 | | | 3 |
| BP | GO:2001056 | positive regulation of cysteine-type endopeptidase activity | | 4/75 | 143/18903 | | 0.002518 | 0.033204 | 0.025115 | | S100A9/S100A8/CTSH/GSN | | | 4 |
| BP | GO:0002523 | leukocyte migration involved in inflammatory response | | 2/75 | 19/18903 | | 0.002542 | 0.033204 | 0.025115 | | S100A9/S100A8 | | | 2 |
| BP | GO:0002544 | chronic inflammatory response | | 2/75 | 19/18903 | | 0.002542 | 0.033204 | 0.025115 | | S100A9/S100A8 | | | 2 |
| BP | GO:0050921 | positive regulation of chemotaxis | | 4/75 | 144/18903 | | 0.002583 | 0.033505 | 0.025343 | | CXCL12/S100A14/CXCL8/CCL3 | | | 4 |
| BP | GO:2000401 | regulation of lymphocyte migration | | 3/75 | 69/18903 | | 0.002605 | 0.033556 | 0.025381 | | APOD/CXCL12/CCL3 | | | 3 |
| BP | GO:0045765 | regulation of angiogenesis | | 6/75 | 349/18903 | | 0.002621 | 0.033556 | 0.025381 | | SFRP2/DCN/CXCL8/SPHK1/CTSH/GPNMB | | | 6 |
| BP | GO:0031333 | negative regulation of protein-containing complex assembly | | 4/75 | 146/18903 | | 0.002714 | 0.034535 | 0.026121 | | EPS8/CLU/GSN/LMO4 | | | 4 |
| BP | GO:1903978 | regulation of microglial cell activation | | 2/75 | 20/18903 | | 0.002818 | 0.035142 | 0.026581 | | SPHK1/CCL3 | | | 2 |
| BP | GO:0002548 | monocyte chemotaxis | | 3/75 | 71/18903 | | 0.002825 | 0.035142 | 0.026581 | | CXCL12/S100A14/CCL3 | | | 3 |
| BP | GO:0003208 | cardiac ventricle morphogenesis | | 3/75 | 71/18903 | | 0.002825 | 0.035142 | 0.026581 | | TPM1/SFRP2/CPE | | | 3 |
| BP | GO:0002687 | positive regulation of leukocyte migration | | 4/75 | 148/18903 | | 0.002851 | 0.035142 | 0.026581 | | CXCL12/S100A14/CXCL8/CCL3 | | | 4 |
| BP | GO:1901342 | regulation of vasculature development | | 6/75 | 355/18903 | | 0.002851 | 0.035142 | 0.026581 | | SFRP2/DCN/CXCL8/SPHK1/CTSH/GPNMB | | | 6 |
| BP | GO:0014743 | regulation of muscle hypertrophy | | 3/75 | 72/18903 | | 0.00294 | 0.036009 | 0.027237 | | IGF1/IGFBP5/PI16 | | | 3 |
| BP | GO:0033002 | muscle cell proliferation | | 5/75 | 247/18903 | | 0.003002 | 0.036034 | 0.027255 | | APOD/IGF1/TPM1/IGFBP5/EREG | | | 5 |
| BP | GO:0071677 | positive regulation of mononuclear cell migration | | 3/75 | 73/18903 | | 0.003057 | 0.036034 | 0.027255 | | CXCL12/S100A14/CCL3 | | | 3 |
| BP | GO:0072678 | T cell migration | | 3/75 | 73/18903 | | 0.003057 | 0.036034 | 0.027255 | | APOD/CXCL12/CCL3 | | | 3 |
| BP | GO:0045821 | positive regulation of glycolytic process | | 2/75 | 21/18903 | | 0.003106 | 0.036034 | 0.027255 | | ZBTB20/IGF1 | | | 2 |
| BP | GO:0061050 | regulation of cell growth involved in cardiac muscle cell development | | 2/75 | 21/18903 | | 0.003106 | 0.036034 | 0.027255 | | IGF1/PI16 | | | 2 |
| BP | GO:0071605 | monocyte chemotactic protein-1 production | | 2/75 | 21/18903 | | 0.003106 | 0.036034 | 0.027255 | | APOD/GSTP1 | | | 2 |
| BP | GO:0071637 | regulation of monocyte chemotactic protein-1 production | | 2/75 | 21/18903 | | 0.003106 | 0.036034 | 0.027255 | | APOD/GSTP1 | | | 2 |
| BP | GO:0090026 | positive regulation of monocyte chemotaxis | | 2/75 | 21/18903 | | 0.003106 | 0.036034 | 0.027255 | | CXCL12/S100A14 | | | 2 |
| BP | GO:0090201 | negative regulation of release of cytochrome c from mitochondria | | 2/75 | 21/18903 | | 0.003106 | 0.036034 | 0.027255 | | IGF1/CLU | | | 2 |
| BP | GO:0048662 | negative regulation of smooth muscle cell proliferation | | 3/75 | 74/18903 | | 0.003177 | 0.036642 | 0.027716 | | APOD/TPM1/IGFBP5 | | | 3 |
| BP | GO:0051092 | positive regulation of NF-kappaB transcription factor activity | | 4/75 | 154/18903 | | 0.003288 | 0.037701 | 0.028516 | | S100A9/S100A8/CLU/SPHK1 | | | 4 |
| BP | GO:2001236 | regulation of extrinsic apoptotic signaling pathway | | 4/75 | 155/18903 | | 0.003365 | 0.038188 | 0.028885 | | IGF1/SFRP2/GSTP1/TIMP3 | | | 4 |
| BP | GO:0034612 | response to tumor necrosis factor | | 5/75 | 254/18903 | | 0.003383 | 0.038188 | 0.028885 | | GSTP1/CTSK/CXCL8/SPHK1/CCL3 | | | 5 |
| BP | GO:0051767 | nitric-oxide synthase biosynthetic process | | 2/75 | 22/18903 | | 0.003408 | 0.038188 | 0.028885 | | GSTP1/NAMPT | | | 2 |
| BP | GO:0051769 | regulation of nitric-oxide synthase biosynthetic process | | 2/75 | 22/18903 | | 0.003408 | 0.038188 | 0.028885 | | GSTP1/NAMPT | | | 2 |
| BP | GO:0090257 | regulation of muscle system process | | 5/75 | 256/18903 | | 0.003498 | 0.038569 | 0.029173 | | IGF1/TPM1/IGFBP5/SPHK1/PI16 | | | 5 |
| BP | GO:0019221 | cytokine-mediated signaling pathway | | 7/75 | 496/18903 | | 0.003501 | 0.038569 | 0.029173 | | CXCL12/GSTP1/EREG/CXCL8/SPHK1/CXCL2/CCL3 | | | 7 |
| BP | GO:0043410 | positive regulation of MAPK cascade | | 7/75 | 496/18903 | | 0.003501 | 0.038569 | 0.029173 | | IGF1/MIF/SPHK1/IGFBP6/IGFBP4/CCL3/GPNMB | | | 7 |
| BP | GO:0006919 | activation of cysteine-type endopeptidase activity involved in apoptotic process | | 3/75 | 77/18903 | | 0.003555 | 0.038734 | 0.029298 | | S100A9/S100A8/CTSH | | | 3 |
| BP | GO:0032720 | negative regulation of tumor necrosis factor production | | 3/75 | 77/18903 | | 0.003555 | 0.038734 | 0.029298 | | IGF1/GSTP1/GPNMB | | | 3 |
| BP | GO:0060828 | regulation of canonical Wnt signaling pathway | | 5/75 | 260/18903 | | 0.003736 | 0.040484 | 0.030621 | | ZEB2/SFRP2/IGFBP6/IGFBP4/SFRP4 | | | 5 |
| BP | GO:1903556 | negative regulation of tumor necrosis factor superfamily cytokine production | | 3/75 | 79/18903 | | 0.003822 | 0.041182 | 0.03115 | | IGF1/GSTP1/GPNMB | | | 3 |
| BP | GO:0010466 | negative regulation of peptidase activity | | 5/75 | 263/18903 | | 0.003923 | 0.042041 | 0.031799 | | SFRP2/SFN/A2M/TIMP3/PI16 | | | 5 |
| BP | GO:1902903 | regulation of supramolecular fiber organization | | 6/75 | 384/18903 | | 0.004188 | 0.04464 | 0.033765 | | SYNPO2/EPS8/CXCL12/TPM1/CLU/GSN | | | 6 |
| BP | GO:0048708 | astrocyte differentiation | | 3/75 | 82/18903 | | 0.004244 | 0.044993 | 0.034032 | | S100A9/S100A8/VIM | | | 3 |
| BP | GO:0070663 | regulation of leukocyte proliferation | | 5/75 | 269/18903 | | 0.004315 | 0.04535 | 0.034302 | | IGF1/GSTP1/MIF/VSIG4/GPNMB | | | 5 |
| BP | GO:0003205 | cardiac chamber development | | 4/75 | 167/18903 | | 0.004389 | 0.04535 | 0.034302 | | TPM1/SFRP2/CPE/LMO4 | | | 4 |
| BP | GO:0030509 | BMP signaling pathway | | 4/75 | 167/18903 | | 0.004389 | 0.04535 | 0.034302 | | FBN1/SFRP2/FSTL1/SFRP4 | | | 4 |
| BP | GO:0042659 | regulation of cell fate specification | | 2/75 | 25/18903 | | 0.004392 | 0.04535 | 0.034302 | | SFRP2/LMO4 | | | 2 |
| BP | GO:0050927 | positive regulation of positive chemotaxis | | 2/75 | 25/18903 | | 0.004392 | 0.04535 | 0.034302 | | CXCL12/CXCL8 | | | 2 |
| BP | GO:0031424 | keratinization | | 3/75 | 84/18903 | | 0.00454 | 0.046632 | 0.035271 | | KRT2/KRT17/SFN | | | 3 |
| BP | GO:0050926 | regulation of positive chemotaxis | | 2/75 | 26/18903 | | 0.004746 | 0.047511 | 0.035936 | | CXCL12/CXCL8 | | | 2 |
| BP | GO:0051016 | barbed-end actin filament capping | | 2/75 | 26/18903 | | 0.004746 | 0.047511 | 0.035936 | | EPS8/GSN | | | 2 |
| BP | GO:0051238 | sequestering of metal ion | | 2/75 | 26/18903 | | 0.004746 | 0.047511 | 0.035936 | | S100A9/S100A8 | | | 2 |
| BP | GO:1905048 | regulation of metallopeptidase activity | | 2/75 | 26/18903 | | 0.004746 | 0.047511 | 0.035936 | | CLDN4/TIMP3 | | | 2 |
| BP | GO:2000050 | regulation of non-canonical Wnt signaling pathway | | 2/75 | 26/18903 | | 0.004746 | 0.047511 | 0.035936 | | SFRP2/SFRP4 | | | 2 |
| BP | GO:0110053 | regulation of actin filament organization | | 5/75 | 278/18903 | | 0.004955 | 0.049353 | 0.03733 | | SYNPO2/EPS8/CXCL12/TPM1/GSN | | | 5 |
| BP | GO:0014910 | regulation of smooth muscle cell migration | | 3/75 | 87/18903 | | 0.005008 | 0.049627 | 0.037537 | | IGF1/TPM1/IGFBP5 | | | 3 |
| BP | GO:0031214 | biomineral tissue development | | 4/75 | 174/18903 | | 0.005073 | 0.049668 | 0.037568 | | IGF1/MGP/CCL3/ASPN | | | 4 |
| BP | GO:0032682 | negative regulation of chemokine production | | 2/75 | 27/18903 | | 0.005113 | 0.049668 | 0.037568 | | APOD/GSTP1 | | | 2 |
| BP | GO:0044342 | type B pancreatic cell proliferation | | 2/75 | 27/18903 | | 0.005113 | 0.049668 | 0.037568 | | IGFBP5/IGFBP4 | | | 2 |
| BP | GO:0061436 | establishment of skin barrier | | 2/75 | 27/18903 | | 0.005113 | 0.049668 | 0.037568 | | CLDN4/SFN | | | 2 |
| CC | GO:0062023 | collagen-containing extracellular matrix | | 19/79 | 433/19869 | | 4.82E-15 | 7.42E-13 | 6.34E-13 | | S100A9/S100A8/MGP/CXCL12/FBN1/CCDC80/SFRP2/DCN/DPT/CLU/A2M/VCAN/BGN/TIMP3/CTSH/MFAP5/EFEMP1/ASPN/IGFBP7 | | | 19 |
| CC | GO:0034774 | secretory granule lumen | | 12/79 | 322/19869 | | 5.19E-09 | 2.37E-07 | 2.03E-07 | | S100A9/S100A8/IGF1/GSTP1/MIF/CLU/CFD/A2M/TIMP3/HSPA6/CTSH/GSN | | | 12 |
| CC | GO:0060205 | cytoplasmic vesicle lumen | | 12/79 | 325/19869 | | 5.76E-09 | 2.37E-07 | 2.03E-07 | | S100A9/S100A8/IGF1/GSTP1/MIF/CLU/CFD/A2M/TIMP3/HSPA6/CTSH/GSN | | | 12 |
| CC | GO:0031983 | vesicle lumen | | 12/79 | 327/19869 | | 6.17E-09 | 2.37E-07 | 2.03E-07 | | S100A9/S100A8/IGF1/GSTP1/MIF/CLU/CFD/A2M/TIMP3/HSPA6/CTSH/GSN | | | 12 |
| CC | GO:1904813 | ficolin-1-rich granule lumen | | 6/79 | 124/19869 | | 1.00E-05 | 0.000309 | 0.000264 | | GSTP1/MIF/CFD/HSPA6/CTSH/GSN | | | 6 |
| CC | GO:0101002 | ficolin-1-rich granule | | 6/79 | 185/19869 | | 9.51E-05 | 0.00244 | 0.002085 | | GSTP1/MIF/CFD/HSPA6/CTSH/GSN | | | 6 |
| CC | GO:0031093 | platelet alpha granule lumen | | 4/79 | 67/19869 | | 0.000147 | 0.003227 | 0.002757 | | IGF1/CLU/CFD/A2M | | | 4 |
| CC | GO:0005788 | endoplasmic reticulum lumen | | 7/79 | 312/19869 | | 0.000243 | 0.00467 | 0.00399 | | FBN1/IGFBP5/FSTL1/CLU/VCAN/IGFBP4/IGFBP7 | | | 7 |
| CC | GO:0072562 | blood microparticle | | 5/79 | 145/19869 | | 0.000282 | 0.004827 | 0.004124 | | CFH/CLU/A2M/HSPA6/GSN | | | 5 |
| CC | GO:0031091 | platelet alpha granule | | 4/79 | 91/19869 | | 0.000476 | 0.007329 | 0.006262 | | IGF1/CLU/CFD/A2M | | | 4 |
| CC | GO:0043202 | lysosomal lumen | | 4/79 | 98/19869 | | 0.00063 | 0.008818 | 0.007534 | | DCN/CTSK/VCAN/BGN | | | 4 |
| CC | GO:0001527 | microfibril | | 2/79 | 13/19869 | | 0.001183 | 0.015187 | 0.012976 | | FBN1/MFAP5 | | | 2 |
| CC | GO:0045111 | intermediate filament cytoskeleton | | 5/79 | 253/19869 | | 0.003372 | 0.039942 | 0.034127 | | S100A8/KRT2/KRT17/KRT14/VIM | | | 5 |
| MF | GO:0005201 | extracellular matrix structural constituent | | 10/77 | 173/18432 | | 2.61E-09 | 6.05E-07 | 4.75E-07 | | MGP/FBN1/DCN/DPT/VCAN/BGN/MFAP5/EFEMP1/ASPN/IGFBP7 | | | 10 |
| MF | GO:0048018 | receptor ligand activity | | 13/77 | 491/18432 | | 1.13E-07 | 1.01E-05 | 7.92E-06 | | IGF1/CXCL12/FBN1/SFRP2/EREG/MIF/CXCL8/CXCL2/CXCL14/NAMPT/EFEMP1/CCL3/GPNMB | | | 13 |
| MF | GO:0030546 | signaling receptor activator activity | | 13/77 | 498/18432 | | 1.33E-07 | 1.01E-05 | 7.92E-06 | | IGF1/CXCL12/FBN1/SFRP2/EREG/MIF/CXCL8/CXCL2/CXCL14/NAMPT/EFEMP1/CCL3/GPNMB | | | 13 |
| MF | GO:0001968 | fibronectin binding | | 5/77 | 31/18432 | | 1.74E-07 | 1.01E-05 | 7.92E-06 | | CCDC80/SFRP2/IGFBP5/CTSK/IGFBP6 | | | 5 |
| MF | GO:0042379 | chemokine receptor binding | | 6/77 | 71/18432 | | 5.03E-07 | 2.34E-05 | 1.83E-05 | | CXCL12/S100A14/CXCL8/CXCL2/CXCL14/CCL3 | | | 6 |
| MF | GO:0005539 | glycosaminoglycan binding | | 9/77 | 237/18432 | | 6.23E-07 | 2.41E-05 | 1.89E-05 | | CFH/FBN1/CCDC80/DCN/FSTL1/CXCL8/VCAN/BGN/GPNMB | | | 9 |
| MF | GO:0005520 | insulin-like growth factor binding | | 4/77 | 19/18432 | | 1.04E-06 | 3.45E-05 | 2.71E-05 | | IGFBP5/IGFBP6/IGFBP4/IGFBP7 | | | 4 |
| MF | GO:0008009 | chemokine activity | | 5/77 | 49/18432 | | 1.84E-06 | 5.01E-05 | 3.94E-05 | | CXCL12/CXCL8/CXCL2/CXCL14/CCL3 | | | 5 |
| MF | GO:0030021 | extracellular matrix structural constituent conferring compression resistance | | 4/77 | 22/18432 | | 1.94E-06 | 5.01E-05 | 3.94E-05 | | DCN/VCAN/BGN/ASPN | | | 4 |
| MF | GO:1901681 | sulfur compound binding | | 8/77 | 270/18432 | | 1.68E-05 | 0.000389 | 0.000306 | | CFH/FBN1/CCDC80/ACOT7/GSTP1/FSTL1/CXCL8/GPNMB | | | 8 |
| MF | GO:0031994 | insulin-like growth factor I binding | | 3/77 | 13/18432 | | 1.95E-05 | 0.00041 | 0.000322 | | IGFBP5/IGFBP6/IGFBP4 | | | 3 |
| MF | GO:0048306 | calcium-dependent protein binding | | 5/77 | 81/18432 | | 2.23E-05 | 0.000431 | 0.000339 | | S100A9/S100A8/S100A14/S100A16/A2M | | | 5 |
| MF | GO:0045236 | CXCR chemokine receptor binding | | 3/77 | 18/18432 | | 5.47E-05 | 0.000976 | 0.000766 | | CXCL12/CXCL8/CXCL2 | | | 3 |
| MF | GO:0005125 | cytokine activity | | 7/77 | 237/18432 | | 5.95E-05 | 0.000986 | 0.000774 | | CXCL12/MIF/CXCL8/CXCL2/CXCL14/NAMPT/CCL3 | | | 7 |
| MF | GO:0008201 | heparin binding | | 6/77 | 171/18432 | | 8.03E-05 | 0.001242 | 0.000975 | | CFH/FBN1/CCDC80/FSTL1/CXCL8/GPNMB | | | 6 |
| MF | GO:0005126 | cytokine receptor binding | | 7/77 | 273/18432 | | 0.000144 | 0.002085 | 0.001637 | | CXCL12/S100A14/MIF/CXCL8/CXCL2/CXCL14/CCL3 | | | 7 |
| MF | GO:0019838 | growth factor binding | | 5/77 | 132/18432 | | 0.000228 | 0.003115 | 0.002445 | | IGFBP5/IGFBP6/A2M/IGFBP4/IGFBP7 | | | 5 |
| MF | GO:0017147 | Wnt-protein binding | | 3/77 | 30/18432 | | 0.000262 | 0.003382 | 0.002655 | | SFRP2/APCDD1/SFRP4 | | | 3 |
| MF | GO:0042056 | chemoattractant activity | | 3/77 | 36/18432 | | 0.000453 | 0.005257 | 0.004127 | | MIF/CCL3/GPNMB | | | 3 |
| MF | GO:0043394 | proteoglycan binding | | 3/77 | 36/18432 | | 0.000453 | 0.005257 | 0.004127 | | CFH/CTSK/GPNMB | | | 3 |
| MF | GO:0005178 | integrin binding | | 5/77 | 156/18432 | | 0.000493 | 0.005443 | 0.004272 | | IGF1/CXCL12/FBN1/SFRP2/GPNMB | | | 5 |
| MF | GO:0050786 | RAGE receptor binding | | 2/77 | 10/18432 | | 0.000759 | 0.007999 | 0.006279 | | S100A9/S100A8 | | | 2 |
| MF | GO:0001851 | complement component C3b binding | | 2/77 | 11/18432 | | 0.000925 | 0.009326 | 0.00732 | | CFH/VSIG4 | | | 2 |
| MF | GO:0005200 | structural constituent of cytoskeleton | | 4/77 | 107/18432 | | 0.001049 | 0.010036 | 0.007878 | | KRT2/TPM1/KRT14/VIM | | | 4 |
| MF | GO:0035325 | Toll-like receptor binding | | 2/77 | 12/18432 | | 0.001106 | 0.010036 | 0.007878 | | S100A9/S100A8 | | | 2 |
| MF | GO:0005504 | fatty acid binding | | 3/77 | 49/18432 | | 0.001125 | 0.010036 | 0.007878 | | S100A9/S100A8/GSTP1 | | | 3 |
| MF | GO:0019215 | intermediate filament binding | | 2/77 | 13/18432 | | 0.001304 | 0.01091 | 0.008564 | | KRT14/VIM | | | 2 |
| MF | GO:0001664 | G protein-coupled receptor binding | | 6/77 | 289/18432 | | 0.001317 | 0.01091 | 0.008564 | | CXCL12/S100A14/CXCL8/CXCL2/CXCL14/CCL3 | | | 6 |
| MF | GO:0036041 | long-chain fatty acid binding | | 2/77 | 15/18432 | | 0.001746 | 0.013969 | 0.010964 | | S100A9/S100A8 | | | 2 |
| MF | GO:0061134 | peptidase regulator activity | | 5/77 | 232/18432 | | 0.002865 | 0.022156 | 0.017391 | | SFRP2/A2M/TIMP3/CTSH/PI16 | | | 5 |
| MF | GO:0005518 | collagen binding | | 3/77 | 69/18432 | | 0.003013 | 0.022549 | 0.0177 | | DCN/CTSK/ASPN | | | 3 |
| MF | GO:0001846 | opsonin binding | | 2/77 | 21/18432 | | 0.003436 | 0.024911 | 0.019553 | | CFH/VSIG4 | | | 2 |
| MF | GO:0004602 | glutathione peroxidase activity | | 2/77 | 22/18432 | | 0.003769 | 0.0265 | 0.020801 | | GSTP1/MGST1 | | | 2 |
| MF | GO:0008083 | growth factor activity | | 4/77 | 162/18432 | | 0.00473 | 0.03138 | 0.024632 | | IGF1/CXCL12/EREG/EFEMP1 | | | 4 |
| MF | GO:0033293 | monocarboxylic acid binding | | 3/77 | 81/18432 | | 0.004734 | 0.03138 | 0.024632 | | S100A9/S100A8/GSTP1 | | | 3 |
| MF | GO:0001848 | complement binding | | 2/77 | 26/18432 | | 0.005246 | 0.032895 | 0.025821 | | CFH/VSIG4 | | | 2 |
| MF | GO:0004364 | glutathione transferase activity | | 2/77 | 26/18432 | | 0.005246 | 0.032895 | 0.025821 | | GSTP1/MGST1 | | | 2 |
| MF | GO:0016209 | antioxidant activity | | 3/77 | 85/18432 | | 0.005416 | 0.033063 | 0.025953 | | S100A9/GSTP1/MGST1 | | | 3 |
| MF | GO:0051787 | misfolded protein binding | | 2/77 | 29/18432 | | 0.006501 | 0.038672 | 0.030355 | | CLU/HSPA6 | | | 2 |
| MF | GO:0005154 | epidermal growth factor receptor binding | | 2/77 | 33/18432 | | 0.008364 | 0.048511 | 0.038078 | | EREG/EFEMP1 | | | 2 |
