# Supplementary material
Source: Research Square preprint supplement (doi:10.21203/rs.3.rs-5336506/v1)
Supplement: Supplementary file 6 [file a94128e09aa493257b25766b.docx]

**Table S5** Details of molecular docking

| Gene symbol | Protein | PDB ID | Molecular name | Minimum binding free energy (kcal/mol) |
| --- | --- | --- | --- | --- |
| CXCL8 | IL-8 | 1ICW | foscarnet | -4.0 |
| CXCL12 | SDF 1 | 1A15 | chlorambucil | -5.2 |
| DCN | Decorin | AF-P07585-F1 | sirolimus | -7.5 |
