# Supplementary material
Source: Research Square preprint supplement (doi:10.21203/rs.3.rs-5336506/v1)
Supplement: Supplementary file 7 [file ac38f09da755be79a159e8fe.docx]

**Table S3** KEGG enrichment analysis

| ID | Description | GeneRatio | BgRatio | pvalue | p.adjust | qvalue | geneID | Count |
| --- | --- | --- | --- | --- | --- | --- | --- | --- |
| hsa04610 | Complement and coagulation cascades | 4/27 | 86/8386 | 0.000151 | 0.000151 | 0.012091 | CFH/CFD/CLU/A2M | 4 |
| hsa05323 | Rheumatoid arthritis | 3/27 | 93/8386 | 0.003185 | 0.003185 | 0.062556 | CXCL12/CTSK/CXCL8 | 3 |
| hsa04657 | IL-17 signaling pathway | 3/27 | 94/8386 | 0.003283 | 0.003283 | 0.062556 | S100A8/S100A9/CXCL8 | 3 |
| hsa05150 | Staphylococcus aureus infection | 3/27 | 96/8386 | 0.003484 | 0.003484 | 0.062556 | CFH/CFD/KRT17 | 3 |
| hsa04061 | Viral protein interaction with cytokine and cytokine receptor | 3/27 | 100/8386 | 0.00391 | 0.00391 | 0.062556 | CXCL12/CXCL14/CXCL8 | 3 |
| hsa04960 | Aldosterone-regulated sodium reabsorption | 2/27 | 37/8386 | 0.006203 | 0.006203 | 0.082704 | SFN/IGF1 | 2 |
| hsa04310 | Wnt signaling pathway | 3/27 | 170/8386 | 0.016752 | 0.016752 | 0.191454 | SFRP4/SFRP2/APCDD1 | 3 |
| hsa04115 | p53 signaling pathway | 2/27 | 73/8386 | 0.022798 | 0.022798 | 0.205136 | SFN/IGF1 | 2 |
| hsa04062 | Chemokine signaling pathway | 3/27 | 192/8386 | 0.023078 | 0.023078 | 0.205136 | CXCL12/CXCL14/CXCL8 | 3 |
| hsa05205 | Proteoglycans in cancer | 3/27 | 205/8386 | 0.027352 | 0.027352 | 0.218818 | DCN/LUM/IGF1 | 3 |
| hsa04350 | TGF-beta signaling pathway | 2/27 | 98/8386 | 0.039259 | 0.039259 | 0.269065 | FBN1/DCN | 2 |
| hsa04064 | NF-kappa B signaling pathway | 2/27 | 104/8386 | 0.043723 | 0.043723 | 0.269065 | CXCL12/CXCL8 | 2 |
| hsa04620 | Toll-like receptor signaling pathway | 2/27 | 104/8386 | 0.043723 | 0.043723 | 0.269065 | CTSK/CXCL8 | 2 |
