# Supplementary material
Source: Research Square preprint supplement (doi:10.21203/rs.3.rs-5336506/v1)

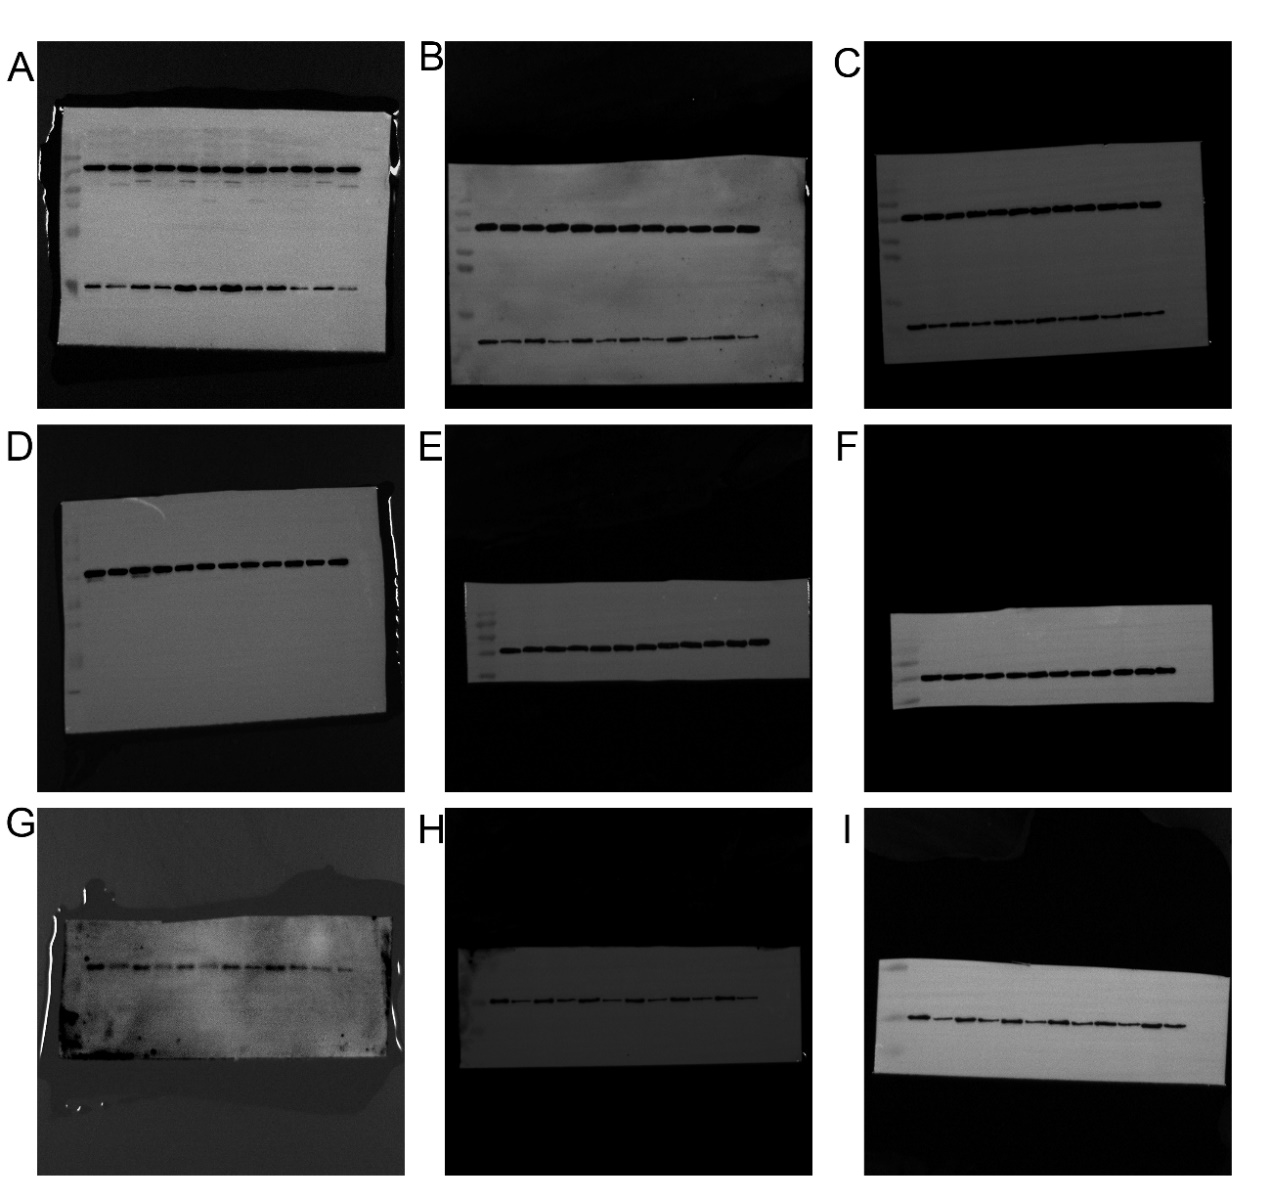


**Original WB gels**

A-I Original blots of CXCL12 and β-actin (A-C), β-actin (D-F), IGF1 (G-I)

Supplement: Supplementary file 4 [file 68ab2c6bc7d3580acda7d76d.docx]
